# Supplementary material for: Convergent energies and anharmonic vibrational spectra of Ca2H2 and Ca2H4 constitutional isomers
Source: Royal Society of Chemistry journal article supplement (doi:10.1039/c9cp01643k), 2019-01-01
Supplement: c9cp01643k1.pdf [file c9cp01643k1.pdf]

**Supplementary Information:  
Convergent Energies and Anharmonic  
Vibrational Spectra of  $\text{Ca}_2\text{H}_2$  and  $\text{Ca}_2\text{H}_4$   
Constitutional Isomers**

Michael C. Bowman

Gary E. Douberly

Henry F. Schaefer III

Center for Computational Quantum Chemistry

University of Georgia

Athens, GA, USA 30602

# Contents

|          |                                                                               |            |
|----------|-------------------------------------------------------------------------------|------------|
| <b>1</b> | <b>Basis Set Benchmarking</b>                                                 | <b>S3</b>  |
| <b>2</b> | <b>Geometries, Frequencies, and Energies</b>                                  | <b>S6</b>  |
| 2.1      | Ca <sub>2</sub> . . . . .                                                     | S6         |
| 2.2      | H <sub>2</sub> . . . . .                                                      | S7         |
| 2.3      | CaH ( <sup>2</sup> Σ <sup>+</sup> ) . . . . .                                 | S8         |
| 2.4      | CaH <sub>2</sub> . . . . .                                                    | S9         |
| 2.5      | M1 [HCaCaH] <i>D</i> <sub>∞h</sub> . . . . .                                  | S10        |
| 2.6      | M2 [Ca(μ <sub>2</sub> -H)CaH] <i>C</i> <sub>s</sub> . . . . .                 | S11        |
| 2.7      | M3 [Ca(μ <sub>2</sub> -H) <sub>2</sub> Ca] <i>D</i> <sub>2h</sub> . . . . .   | S12        |
| 2.8      | M4 [HCa(μ <sub>2</sub> -H) <sub>2</sub> CaH] <i>D</i> <sub>2h</sub> . . . . . | S13        |
| 2.9      | M5 [HCa(μ <sub>2</sub> -H) <sub>3</sub> Ca] <i>C</i> <sub>3v</sub> . . . . .  | S14        |
| 2.10     | M6 [Ca(μ <sub>2</sub> -H) <sub>4</sub> Ca] <i>D</i> <sub>4h</sub> . . . . .   | S15        |
| 2.11     | TS1 [M1 → M2] <i>C</i> <sub>s</sub> . . . . .                                 | S16        |
| 2.12     | TS2 [M2 → M3] <i>C</i> <sub>1</sub> . . . . .                                 | S17        |
| 2.13     | TS3 [M2 → M2] <i>C</i> <sub>2v</sub> . . . . .                                | S18        |
| 2.14     | TS4 [M4 → M5] <i>C</i> <sub>s</sub> . . . . .                                 | S19        |
| 2.15     | TS5 [M5 → M6] <i>C</i> <sub>s</sub> . . . . .                                 | S20        |
| 2.16     | TS6 [M5 → M5] <i>C</i> <sub>2v</sub> . . . . .                                | S21        |
| <b>3</b> | <b>M5 vs. M4 Thermodynamical Analysis</b>                                     | <b>S22</b> |
| <b>4</b> | <b>Relaxed Surface Scans</b>                                                  | <b>S23</b> |
| 4.1      | 2 CaH → M1 . . . . .                                                          | S23        |
| 4.2      | CaH <sub>2</sub> + Ca → M2 . . . . .                                          | S24        |
| 4.3      | 2 CaH <sub>2</sub> → Ca <sub>2</sub> H <sub>4</sub> . . . . .                 | S25        |
| <b>5</b> | <b>QSD Reaction Paths</b>                                                     | <b>S26</b> |
| 5.1      | M1 → TS1 → M2 . . . . .                                                       | S26        |
| 5.2      | M2 → TS2 → M3 . . . . .                                                       | S28        |
| 5.3      | M2 → TS3 → M2' . . . . .                                                      | S31        |
| 5.4      | M4 → TS4 → M5 . . . . .                                                       | S38        |
| 5.5      | M5 → TS5 → M6 . . . . .                                                       | S43        |
| 5.6      | M5 → TS6 → M5' . . . . .                                                      | S54        |

# 1 Basis Set Benchmarking

In this section we briefly justify the level of theory used in the present research. Table S3 shows the results from various CCSD(T) computations involving different basis sets and different levels of electron correlation. Molpro 2010 was used for these computations with a UHF reference. Spin contamination ( $\langle S^2 - S_z^2 - S_z \rangle$ ) for each computation was less than or equal to 0.003. For the pseudopotential computations we used the small-core (10 electron) DHF-adjusted pseudopotentials of Lim et al. <sup>1</sup> along with the correlation consistent basis sets designed by Hill and Peterson <sup>2</sup> to complement the small-core pseudopotentials. From Table S3 we were able to make the following observations:

1. Correlating the 3s and 3p electrons on the calcium atom dramatically improved  $R_e$ ,  $\omega_e$ , and  $D_e$ . Correlating the 1s, 2s, and 2p electrons on calcium (in addition to the 3s and 3p electrons) had a minor affect on any molecular property
2. Using a pseudopotential for the ten inner-core electrons did not appreciably change  $R_e$  or  $\omega_e$ . Due to technical limitations with using a small-core pseudopotential we chose to use regular cc-pwCVXZ basis sets instead.
3. The cc-pwCVQZ basis set slightly outperformed the cc-pCVQZ basis set at predicting  $R_e$  and  $\omega_e$ . Thus we decided to employed the weighted core valence basis sets over the core valence basis sets.
4. The higher order correlation correction ( $\delta_{TQ}$ ) has a minor impact on the value of  $D_e$  ( $\leq 0.1$  kcal mol<sup>-1</sup>). Given the same number of electrons correlated, this correction is relatively independent of the basis set.
5. The relativistic computations (e.g. cc-pwCVDZ-DK) did not considerably disagree from the non-relativistic computations (e.g. cc-pwCVDZ) in terms of  $R_e$  and  $\omega_e$ . There is a considerable difference in  $D_e$  between relativistic and non-relativistic computations, but this difference can be accounted for by a post hoc computation.
6. The addition of diffuse functions to hydrogen atoms has a more significant on molecular properties than the addition of diffuse functions to calcium atoms. This is in agreement with the relative electronegativity of hydrogen and calcium. Given the computational limitations it is lucrative to add diffuse functions to the hydrogen atoms alone.

Table S1: CCSD(T) benchmarking results for CaH.

| E <sup>a</sup> | Calcium                 | Hydrogen    | R <sub>e</sub> | ω <sub>e</sub> | D <sub>e</sub> | δ <sub>TQ</sub> <sup>b</sup> |
|----------------|-------------------------|-------------|----------------|----------------|----------------|------------------------------|
| 3              | cc-pVDZ                 | cc-pVDZ     | 2.0548         | 1247.6         | 34.88          | 0.10                         |
| 11             | cc-pCVDZ                | cc-pVDZ     | 2.0321         | 1254.8         | 33.21          | 0.02                         |
| 11             | cc-pwCVDZ               | cc-pVDZ     | 2.0319         | 1260.2         | 32.97          | 0.03                         |
| 21             | cc-pwCVDZ               | cc-pVDZ     | 2.0315         | 1259.4         | 32.98          | 0.03                         |
| 3              | cc-pVDZ-PP              | cc-pVDZ     | 2.0503         | 1251.5         | 34.34          | 0.10                         |
| 11             | cc-pCVDZ-PP             | cc-pVDZ     | 2.0269         | 1261.6         | 32.74          | 0.03                         |
| 11             | cc-pwCVDZ-PP            | cc-pVDZ     | 2.0273         | 1265.1         | 32.63          | 0.02                         |
| 11             | aug-cc-pwCVDZ-PP        | cc-pVDZ     | 2.0282         | 1263.5         | 32.65          | 0.02                         |
| 11             | cc-pwCVDZ-PP            | aug-cc-pVDZ | 2.0352         | 1261.3         | 36.32          | 0.03                         |
| 11             | aug-cc-pwCVDZ-PP        | aug-cc-pVDZ | 2.0282         | 1263.5         | 32.65          | 0.02                         |
| 11             | cc-pwCVDZ-DK            | cc-pVDZ     | 2.0206         | 1258.4         | 33.41          | 0.04                         |
| 21             | cc-pwCVDZ-DK            | cc-pVDZ     | 2.0198         | 1258.6         | 33.45          | 0.04                         |
| 3              | cc-pVTZ                 | cc-pVTZ     | 2.0538         | 1274.8         | 40.62          | 0.10                         |
| 11             | cc-pCVTZ                | cc-pVTZ     | 2.0159         | 1281.1         | 39.08          | 0.08                         |
| 11             | cc-pwCVTZ               | cc-pVTZ     | 2.0094         | 1294.4         | 39.40          | 0.08                         |
| 21             | cc-pwCVTZ               | cc-pVTZ     | 2.0077         | 1290.9         | 39.44          |                              |
| 3              | cc-pVTZ-PP              | cc-pVTZ     | 2.0517         | 1273.9         | 40.05          | 0.10                         |
| 11             | cc-pCVTZ-PP             | cc-pVTZ     | 2.0137         | 1284.7         | 38.42          | 0.07                         |
| 11             | cc-pwCVTZ-PP            | cc-pVTZ     | 2.0075         | 1299.5         | 38.75          | 0.08                         |
| 11             | aug-cc-pwCVTZ-PP        | cc-pVTZ     | 2.0082         | 1297.6         | 38.80          | 0.08                         |
| 11             | cc-pwCVTZ-PP            | aug-cc-pVTZ | 2.0108         | 1290.4         | 39.50          | 0.06                         |
| 11             | aug-cc-pwCVTZ-PP        | aug-cc-pVTZ | 2.0110         | 1289.6         | 39.49          | 0.07                         |
| 11             | cc-pwCVTZ-DK            | cc-pVTZ     | 2.0103         | 1296.1         | 38.79          | 0.08                         |
| 21             | cc-pwCVTZ-DK            | cc-pVTZ     | 2.0083         | 1296.0         | 38.85          |                              |
| 3              | cc-pVQZ                 | cc-pVQZ     | 2.0534         | 1273.8         | 41.93          |                              |
| 11             | cc-pCVQZ                | cc-pVQZ     | 2.0053         | 1295.1         | 40.83          |                              |
| 11             | cc-pwCVQZ               | cc-pVQZ     | 2.0033         | 1299.9         | 40.90          |                              |
| 3              | cc-pVQZ-PP              | cc-pVQZ     | 2.0502         | 1273.1         | 41.31          |                              |
| 11             | cc-pCVQZ-PP             | cc-pVQZ     | 2.0036         | 1297.3         | 40.08          |                              |
| 11             | cc-pwCVQZ-PP            | cc-pVQZ     | 2.0023         | 1302.3         | 40.14          |                              |
| 11             | aug-cc-pwCVQZ-PP        | cc-pVQZ     | 2.0028         | 1300.6         | 40.16          |                              |
| 11             | cc-pwCVQZ-PP            | aug-cc-pVQZ | 2.0060         | 1295.1         | 39.81          |                              |
| 11             | aug-cc-pwCVQZ-PP        | aug-cc-pVQZ | 2.0035         | 1298.6         | 40.43          |                              |
| 11             | cc-pwCVQZ-DK            | cc-pVQZ     | 2.0044         | 1299.4         | 40.25          |                              |
| 3              | cc-pV5Z                 | cc-pV5Z     | 2.0541         | 1271.1         | 42.27          |                              |
| 11             | cc-pCV5Z                | cc-pV5Z     | 2.0028         | 1297.8         | 41.39          |                              |
| 11             | cc-pwCV5Z               | cc-pV5Z     | 2.0022         | 1300.2         | 41.40          |                              |
| 3              | cc-pV5Z-PP              | cc-pV5Z     | 2.0506         | 1272.7         | 41.69          |                              |
| 11             | cc-pCV5Z-PP             | cc-pV5Z     | 2.0020         | 1298.6         | 40.59          |                              |
| 11             | cc-pwCV5Z-PP            | cc-pV5Z     | 2.0013         | 1301.0         | 40.60          |                              |
| 11             | aug-cc-pwCV5Z-PP        | cc-pV5Z     | 2.0015         | 1300.4         | 40.61          |                              |
| 11             | cc-pwCV5Z-PP            | aug-cc-pV5Z | 2.0015         | 1300.6         | 40.71          |                              |
| 11             | aug-cc-pwCV5Z-PP        | aug-cc-pV5Z | 2.0015         | 1300.6         | 40.70          |                              |
|                | Experiment <sup>c</sup> |             | 2.0025         | 1298.3         | 41.10          |                              |

<sup>a</sup> Number of electrons correlated<sup>b</sup> CCSDTQ correction to the dissociation energy ( $D_e$ )<sup>c</sup> Huber and Herzberg <sup>3</sup>

Table S2: CCSD(T) benchmarking results for Ca<sub>2</sub>H<sub>2</sub>.

| E <sup>a</sup> | Calcium          | Hydrogen    | Ca-Ca  | Ca-H   | D <sub>e</sub> |
|----------------|------------------|-------------|--------|--------|----------------|
| 6              | cc-pVDZ          | cc-pVDZ     | 3.8576 | 2.0649 | 30.12          |
| 22             | cc-pCVDZ         | cc-pVDZ     | 3.7964 | 2.0433 | 29.49          |
| 22             | cc-pwCVDZ        | cc-pVDZ     | 3.7940 | 2.0428 | 29.13          |
| 42             | cc-pwCVDZ        | cc-pVDZ     | 3.7928 | 2.0425 | 29.19          |
| 6              | cc-pVDZ-PP       | cc-pVDZ     | 3.8381 | 2.0594 | 29.88          |
| 22             | cc-pCVDZ-PP      | cc-pVDZ     | 3.7762 | 2.0369 | 29.31          |
| 22             | cc-pwCVDZ-PP     | cc-pVDZ     | 3.7757 | 2.0370 | 29.10          |
| 22             | aug-cc-pwCVDZ-PP | cc-pVDZ     | 3.7748 | 2.0379 | 29.49          |
| 22             | cc-pwCVDZ-PP     | aug-cc-pVDZ | 3.7873 | 2.0433 | 28.81          |
| 22             | aug-cc-pwCVDZ-PP | aug-cc-pVDZ | 3.7840 | 2.0443 | 36.39          |
| 22             | cc-pwCVDZ-DK     | cc-pVDZ     | 3.7892 | 2.0355 | 30.11          |
| 42             | cc-pwCVDZ-DK     | cc-pVDZ     | 3.7884 | 2.0348 | 30.16          |
| 6              | cc-pVTZ          | cc-pVTZ     | 3.8114 | 2.0682 | 32.67          |
| 22             | cc-pCVTZ         | cc-pVTZ     | 3.7342 | 2.0332 | 31.39          |
| 22             | cc-pwCVTZ        | cc-pVTZ     | 3.7312 | 2.0275 | 31.24          |
| 42             | cc-pwCVTZ        | cc-pVTZ     | 3.7210 | 2.0260 | 31.49          |
| 6              | cc-pVTZ-PP       | cc-pVTZ     | 3.7987 | 2.0654 | 32.83          |
| 22             | cc-pCVTZ-PP      | cc-pVTZ     | 3.7200 | 2.0296 | 31.74          |
| 22             | cc-pwCVTZ-PP     | cc-pVTZ     | 3.7170 | 2.0241 | 31.60          |
| 22             | aug-cc-pwCVTZ-PP | cc-pVTZ     | 3.7179 | 2.0250 | 31.82          |
| 22             | cc-pwCVTZ-PP     | aug-cc-pVTZ | 3.7173 | 2.0272 | 31.61          |
| 22             | aug-cc-pwCVTZ-PP | aug-cc-pVTZ | 3.7202 | 2.0270 | 31.83          |
| 22             | cc-pwCVTZ-DK     | cc-pVTZ     | 3.7240 | 2.0274 | 31.24          |
| 42             | cc-pwCVTZ-DK     | cc-pVTZ     | 3.7152 | 2.0254 | 31.49          |
| 6              | cc-pVQZ          | cc-pVQZ     | 3.8239 | 2.0686 | 33.35          |
| 22             | cc-pCVQZ         | cc-pVQZ     | 3.7336 | 2.0247 | 32.05          |
| 22             | cc-pwCVQZ        | cc-pVQZ     | 3.7335 | 2.0230 | 31.52          |
| 6              | cc-pVQZ-PP       | cc-pVQZ     | 3.8081 | 2.0647 | 33.36          |
| 22             | cc-pCVQZ-PP      | cc-pVQZ     | 3.7184 | 2.0212 | 31.82          |
| 22             | cc-pwCVQZ-PP     | cc-pVQZ     | 3.7144 | 2.0201 | 31.82          |
| 22             | aug-cc-pwCVQZ-PP | cc-pVQZ     | 3.7151 | 2.0205 | 31.87          |
| 22             | cc-pwCVQZ-PP     | aug-cc-pVQZ | 3.7139 | 2.0233 | 31.82          |
| 22             | aug-cc-pwCVQZ-PP | aug-cc-pVQZ | 3.7150 | 2.0210 | 31.87          |
| 22             | cc-pwCVQZ-DK     | cc-pVQZ     | 3.7254 | 2.0232 | 31.53          |
| 6              | cc-pV5Z          | cc-pV5Z     | 3.8252 | 2.0691 | 33.41          |
| 22             | cc-pCV5Z         | cc-pV5Z     | 3.7303 | 2.0228 | 31.61          |
| 22             | cc-pwCV5Z        | cc-pV5Z     | 3.7291 | 2.0222 | 31.61          |
| 6              | cc-pV5Z-PP       | cc-pV5Z     | 3.8081 | 2.0649 | 33.38          |
| 22             | cc-pCV5Z-PP      | cc-pV5Z     | 3.7107 | 2.0201 | 31.83          |
| 22             | cc-pwCV5Z-PP     | cc-pV5Z     | 3.7096 | 2.0195 | 31.84          |
| 22             | aug-cc-pwCV5Z-PP | cc-pV5Z     | 3.7106 | 2.0196 | 31.88          |
| 22             | cc-pwCV5Z-PP     | aug-cc-pV5Z | 3.7098 | 2.0196 | 31.84          |
| 22             | aug-cc-pwCV5Z-PP | aug-cc-pV5Z | 3.7106 | 2.0196 | 31.88          |

<sup>a</sup> Number of electrons correlated

## 2 Geometries, Frequencies, and Energies

### 2.1 Ca<sub>2</sub>

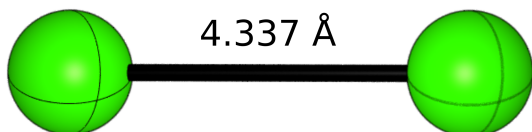**Level of Theory:**

Geometry: CCSD(T)/QZ

Harmonics: CCSD(T)/QZ

Anharmonics: CCSD(T)/TZ

**Wavefunction Diagnostics:**

T1 = 0.019 D1 = 0.072

Figure S1: Ca<sub>2</sub>

Cartesian Coordinates of Optimized Geometry (Å):

|    |              |              |               |
|----|--------------|--------------|---------------|
| Ca | 0.0000000000 | 0.0000000000 | -2.1686786514 |
| Ca | 0.0000000000 | 0.0000000000 | 2.1686786514  |

Rotational Constants (GHz): 0.000 1.341 1.341

Vibrational Frequencies (cm<sup>-1</sup>):

| Mode | Symmetry     | $\omega$ | $\delta\nu$ | $\nu$ | Intensity |
|------|--------------|----------|-------------|-------|-----------|
| 1    | $\sigma_g^+$ | 61.1     | -2.4        | 58.7  | 0.0       |

## 2.2 H<sub>2</sub>

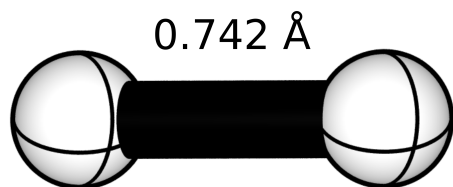

### Level of Theory:

Geometry: CCSD(T)/QZ

Harmonics: CCSD(T)/QZ

Anharmonics: CCSD(T)/TZ

### Wavefunction Diagnostics:

T1 = 0.006 D1 = 0.008

Figure S2: H<sub>2</sub>

Cartesian Coordinates of Optimized Geometry (Å):

|   |              |              |               |
|---|--------------|--------------|---------------|
| H | 0.0000000000 | 0.0000000000 | -0.3710126020 |
| H | 0.0000000000 | 0.0000000000 | 0.3710126020  |

Rotational Constants (GHz): 0.000, 1821.274, 1821.274

Vibrational Frequencies (cm<sup>-1</sup>):

| Mode | Symmetry     | $\omega$ | $\delta\nu$ | $\nu$  | Intensity |
|------|--------------|----------|-------------|--------|-----------|
| 1    | $\sigma_g^+$ | 4344.5   | -254.9      | 4089.6 | 0.0       |

## 2.3 CaH ( $^2\Sigma^+$ )

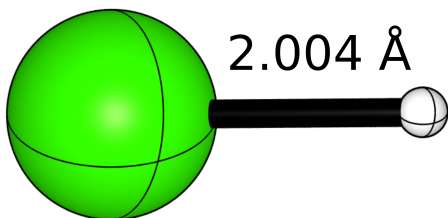

### Level of Theory:

Geometry: CCSD(T)/QZ

Harmonics: CCSD(T)/QZ

Anharmonics: CCSD(T)/TZ

### Wavefunction Diagnostics:

T1 = 0.026 D1 = 0.072

Figure S3: CaH

Cartesian Coordinates of Optimized Geometry (Å):

|    |              |              |               |
|----|--------------|--------------|---------------|
| Ca | 0.0000000000 | 0.0000000000 | -0.0491723631 |
| H  | 0.0000000000 | 0.0000000000 | 1.9553032053  |

Rotational Constants (GHz): 0.000, 127.929, 127.929

Dipole Moment (Debye): 0.0, 0.0, 2.52

Vibrational Frequencies ( $\text{cm}^{-1}$ ):

| Mode | Symmetry   | $\omega$ | $\delta\nu$ | $\nu$  | Intensity |
|------|------------|----------|-------------|--------|-----------|
| 1    | $\sigma^+$ | 1296.6   | -43.9       | 1252.7 | 251.2     |

Focal Point Analysis (in  $\text{kcal mol}^{-1}$ ) of 2 CaH ( $^2\Sigma^+$ ) relative to  $\text{Ca}_2 + \text{H}_2$ :

| Basis     | $\Delta E_e$ HF | $+\delta$ MP2 | $+\delta$ CCSD | $+\delta$ (T) | $+\delta$ T | $+\delta$ (Q) | $\Delta E_e$ Net |
|-----------|-----------------|---------------|----------------|---------------|-------------|---------------|------------------|
| cc-pwCVDZ | +11.43          | +20.81        | -2.05          | +1.85         | -0.01       | +0.33         | [+32.36]         |
| cc-pwCVTZ | +11.47          | +19.69        | -3.72          | +2.83         | -0.17       | [+0.33]       | [+30.43]         |
| cc-pwCVQZ | +11.27          | +19.39        | -4.26          | +3.01         | [-0.17]     | [+0.33]       | [+29.57]         |
| cc-pwCV5Z | +11.26          | +19.31        | -4.56          | +3.08         | [-0.17]     | [+0.33]       | [+29.25]         |
| CBS Limit | [+11.26]        | [+19.23]      | [-4.88]        | [+3.16]       | [-0.17]     | [+0.33]       | [+28.93]         |



## 2.4 CaH<sub>2</sub>

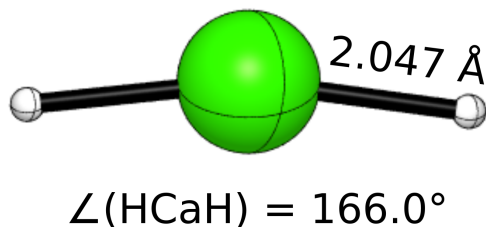

### Level of Theory:

Geometry: CCSD(T)/QZ

Harmonics: CCSD(T)/QZ

Anharmonics: CCSD(T)/TZ

### Wavefunction Diagnostics:

T1 = 0.010    D1 = 0.031

Figure S4: CaH<sub>2</sub>

Cartesian Coordinates of Optimized Geometry (Å):

|    |              |               |               |
|----|--------------|---------------|---------------|
| Ca | 0.0000000000 | 0.0000000000  | -0.0119235058 |
| H  | 0.0000000000 | 2.0313823586  | 0.2370647628  |
| H  | 0.0000000000 | -2.0313823586 | 0.2370647628  |

Rotational Constants (GHz): 59.896, 60.753, 4247.238

Dipole Moment (Debye): 0.0, 0.0, 0.71

Harmonic Vibrational Frequencies (cm<sup>-1</sup>):

| Mode | Symmetry              | $\omega$ | $\delta\nu^*$ | $\nu$  | Intensity |
|------|-----------------------|----------|---------------|--------|-----------|
| 1    | <i>a</i> <sub>1</sub> | 1330.8   | -35.1         | 1295.7 | 4.8       |
| 2    | <i>a</i> <sub>1</sub> | 91.2     |               |        |           |
| 3    | <i>b</i> <sub>2</sub> | 1249.6   | -34.9         | 1214.7 | 859.2     |

Focal Point Analysis (in kcal mol<sup>-1</sup>) of CaH<sub>2</sub> + Ca relative to Ca<sub>2</sub> + H<sub>2</sub>:

| Basis     | $\Delta E_e$ HF | $+\delta$ MP2 | $+\delta$ CCSD | $+\delta$ (T) | $+\delta$ T | $+\delta$ (Q) | $\Delta E_e$ Net |
|-----------|-----------------|---------------|----------------|---------------|-------------|---------------|------------------|
| cc-pwCVDZ | +4.13           | +7.72         | -3.66          | +1.36         | +0.14       | +0.27         | [+9.97]          |
| cc-pwCVTZ | +4.64           | +6.35         | -3.99          | +2.01         | +0.05       | [+0.27]       | [+9.34]          |
| cc-pwCVQZ | +4.53           | +5.86         | -4.01          | +2.15         | [+0.05]     | [+0.27]       | [+8.85]          |
| cc-pwCV5Z | +4.53           | +5.71         | -4.08          | +2.20         | [+0.05]     | [+0.27]       | [+8.69]          |
| CBS Limit | [+4.54]         | [+5.55]       | [-4.15]        | [+2.26]       | [+0.05]     | [+0.27]       | [+8.52]          |

Focal Point Analysis (in kcal mol<sup>-1</sup>) of 2 CaH<sub>2</sub> relative to Ca<sub>2</sub> + 2 H<sub>2</sub>:

| Basis     | $\Delta E_e$ HF | $+\delta$ MP2 | $+\delta$ CCSD | $+\delta$ (T) | $+\delta$ T | $+\delta$ (Q) | $\Delta E_e$ Net |
|-----------|-----------------|---------------|----------------|---------------|-------------|---------------|------------------|
| cc-pwCVDZ | +10.09          | +11.97        | -6.17          | +1.78         | +0.08       | +0.36         | [+18.11]         |
| cc-pwCVTZ | +11.01          | +8.57         | -6.65          | +2.85         | -0.06       | [+0.36]       | [+16.07]         |
| cc-pwCVQZ | +10.76          | +7.23         | -6.59          | +3.00         | [-0.06]     | [+0.36]       | [+14.69]         |
| cc-pwCV5Z | +10.75          | +6.84         | -6.69          | +3.07         | [-0.06]     | [+0.36]       | [+14.27]         |
| CBS Limit | [+10.77]        | [+6.43]       | [-6.80]        | [+3.15]       | [-0.06]     | [+0.36]       | [+13.85]         |

## 2.5 M1 [HCaCaH] $D_{\infty h}$

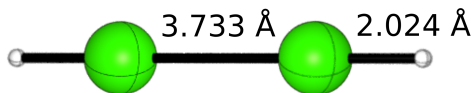

### Level of Theory:

Geometry: CCSD(T)/QZ

Harmonics: CCSD(T)/QZ

Anharmonics: CCSD(T)/TZ

### Wavefunction Diagnostics:

T1 = 0.011    D1 = 0.037

Figure S5: M1

Cartesian Coordinates of Optimized Geometry (Å):

|    |              |              |               |
|----|--------------|--------------|---------------|
| Ca | 0.0000000000 | 0.0000000000 | -1.8666839110 |
| Ca | 0.0000000000 | 0.0000000000 | 1.8666839110  |
| H  | 0.0000000000 | 0.0000000000 | -3.8905587102 |
| H  | 0.0000000000 | 0.0000000000 | 3.8905587102  |

Rotational Constants (GHz): 0.0, 1.631, 1.631

Harmonic Vibrational Frequencies ( $\text{cm}^{-1}$ ):

| Mode | Symmetry     | $\omega$ | $\delta\nu$ | $\nu$  | Intensity |
|------|--------------|----------|-------------|--------|-----------|
| 1    | $\sigma_g^+$ | 1300.3   | -36.3       | 1264.0 | 0.0       |
| 2    | $\sigma_g^+$ | 151.7    | -0.6        | 151.0  | 0.0       |
| 3    | $\pi_g$      | 144.4    | 22.9*       | 167.3  | 0.0       |
| 4    | $\sigma_u^-$ | 1287.9   | -43.0*      | 1244.9 | 1683.9    |
| 5    | $\pi_u$      | 130.1    | 10.3*       | 140.4  | 428.3     |

\* $\nu_3$  corrected for resonance with  $\nu_4 + \nu_5$

\* $\nu_4$  corrected for resonance with  $\nu_3 + \nu_5$

\* $\nu_5$  corrected for resonance with  $\nu_3 + \nu_4$

Focal Point Analysis (in  $\text{kcal mol}^{-1}$ ) relative to  $\text{Ca}_2 + \text{H}_2$ :

| Basis     | $\Delta E_e$ HF | $+\delta$ MP2 | $+\delta$ CCSD | $+\delta$ (T) | $+\delta$ T | $+\delta$ (Q) | $\Delta E_e$ Net |
|-----------|-----------------|---------------|----------------|---------------|-------------|---------------|------------------|
| cc-pwCVDZ | -2.72           | +9.71         | -4.78          | +0.86         | -0.02       | +0.25         | [+3.30]          |
| cc-pwCVTZ | -2.62           | +5.80         | -5.63          | +1.49         | -0.15       | [+0.25]       | [-0.86]          |
| cc-pwCVQZ | -2.77           | +4.59         | -5.52          | +1.58         | [-0.15]     | [+0.25]       | [-2.03]          |
| cc-pwCV5Z | -2.78           | +4.16         | -5.51          | +1.61         | [-0.15]     | [+0.25]       | [-2.42]          |
| CBS Limit | [-2.77]         | [+3.72]       | [-5.51]        | [+1.64]       | [-0.15]     | [+0.25]       | [-2.82]          |

## 2.6 M2 [Ca( $\mu_2$ -H)CaH] $C_s$

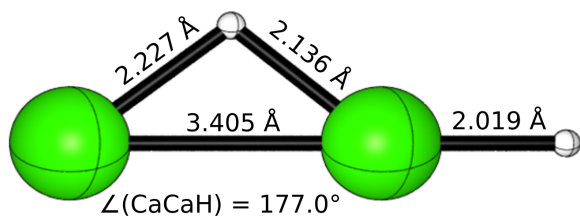

### Level of Theory:

Geometry: CCSD(T)/QZ

Harmonics: CCSD(T)/QZ

Anharmonics: CCSD(T)/TZ

### Wavefunction Diagnostics:

T1 = 0.021    D1 = 0.091

Figure S6: M2

Cartesian Coordinates of Optimized Geometry (Å):

|    |               |              |               |
|----|---------------|--------------|---------------|
| Ca | 0.0207918523  | 0.0000000000 | -1.6563291001 |
| Ca | 0.0150922579  | 0.0000000000 | 1.7490613730  |
| H  | -0.0817695443 | 0.0000000000 | -3.6730098568 |
| H  | -1.3451359629 | 0.0000000000 | -0.0144214354 |

Rotational Constants (GHz): 2.038, 2.053, 272.155

Dipole Moment (Debye): 0.0, 0.0, 2.79

Vibrational Frequencies ( $\text{cm}^{-1}$ ):

| Mode | Symmetry | $\omega$ | $\delta\nu$ | $\nu$  | Intensity |
|------|----------|----------|-------------|--------|-----------|
| 1    | $a'$     | 1304.2   | -34.4       | 1269.7 | 811.1     |
| 2    | $a'$     | 1042.3   | -83.6       | 958.4  | 52.8*     |
| 3    | $a'$     | 843.0    | -46.4       | 796.6  | 729.5     |
| 4    | $a'$     | 214.0    | 4.7         | 218.7  | 247.8     |
| 5    | $a'$     | 163.9    | -3.8        | 160.1  | 25.6      |
| 6    | $a''$    | 136.9    | 11.4        | 148.3  | 313.4     |

\* $\nu_1$  corrected for resonance with  $2\nu_6$

\* $\nu_2$  corrected for resonance with  $\nu_3 + \nu_4$

Focal Point Analysis (in  $\text{kcal mol}^{-1}$ ) relative to  $\text{Ca}_2 + \text{H}_2$ :

| Basis     | $\Delta E_e$ HF | $+\delta$ MP2 | $+\delta$ CCSD | $+\delta$ (T) | $+\delta$ T | $+\delta$ (Q) | $\Delta E_e$ Net |
|-----------|-----------------|---------------|----------------|---------------|-------------|---------------|------------------|
| cc-pwCVDZ | -3.24           | +4.10         | -3.95          | +0.03         | -0.08       | +0.15         | [-2.98]          |
| cc-pwCVTZ | -3.22           | +0.05         | -4.00          | +0.29         | -0.21       | [+0.15]       | [-6.94]          |
| cc-pwCVQZ | -3.48           | -1.24         | -3.89          | +0.29         | [-0.21]     | [+0.15]       | [-8.38]          |
| cc-pwCV5Z | -3.50           | -1.70         | -3.93          | +0.30         | [-0.21]     | [+0.15]       | [-8.90]          |
| CBS Limit | [-3.50]         | [-2.17]       | [-3.98]        | [+0.30]       | [-0.21]     | [+0.15]       | [-9.42]          |

## 2.7 M3 [Ca( $\mu_2$ -H) $_2$ Ca] $D_{2h}$

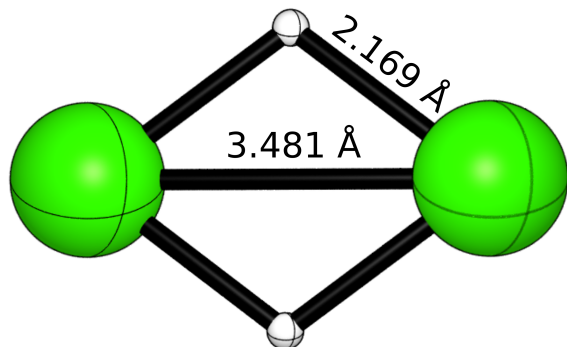

### Level of Theory:

Geometry: CCSD(T)/QZ

Harmonics: CCSD(T)/QZ

Anharmonics: CCSD(T)/TZ

### Wavefunction Diagnostics:

T1 = 0.026 D1 = 0.117

Figure S7: M3

Cartesian Coordinates of Optimized Geometry (Å):

|    |              |               |               |
|----|--------------|---------------|---------------|
| Ca | 0.0000000000 | 0.0000000000  | 1.7403045964  |
| Ca | 0.0000000000 | 0.0000000000  | -1.7403045964 |
| H  | 0.0000000000 | 1.2954015373  | 0.0000000000  |
| H  | 0.0000000000 | -1.2954015373 | 0.0000000000  |

Rotational Constants (GHz): 2.053, 2.082, 149.398

Vibrational Frequencies ( $\text{cm}^{-1}$ ):

| Mode | Symmetry | $\omega$ | $\delta\nu$ | $\nu$  | Intensity |
|------|----------|----------|-------------|--------|-----------|
| 1    | $a_g$    | 1012.0   | -26.6       | 985.4  | 0.0       |
| 2    | $a_g$    | 224.1    | -7.5        | 216.5  | 0.0       |
| 3    | $b_{1g}$ | 1030.1   | -73.9       | 956.2  | 0.0       |
| 4    | $b_{1u}$ | 434.5    | -12.7       | 421.7  | 4.9       |
| 5    | $b_{2u}$ | 829.7    | -28.9       | 800.8  | 122.6     |
| 6    | $b_{3u}$ | 1071.8   | -66.9       | 1004.9 | 25.0      |

Focal Point Analysis (in  $\text{kcal mol}^{-1}$ ) relative to  $\text{Ca}_2 + \text{H}_2$ :

| Basis     | $\Delta E_e$ HF | $+\delta$ MP2 | $+\delta$ CCSD | $+\delta$ (T) | $+\delta$ T | $+\delta$ (Q) | $\Delta E_e$ Net |
|-----------|-----------------|---------------|----------------|---------------|-------------|---------------|------------------|
| cc-pwCVDZ | +4.32           | -9.43         | -2.73          | -4.37         | +0.54       | -0.40         | [-12.07]         |
| cc-pwCVTZ | +4.41           | -11.98        | -2.61          | -4.60         | +0.50       | [-0.40]       | [-14.67]         |
| cc-pwCVQZ | +4.11           | -12.89        | -2.47          | -4.72         | [+0.50]     | [-0.40]       | [-15.87]         |
| cc-pwCV5Z | +4.08           | -13.15        | -2.54          | -4.77         | [+0.50]     | [-0.40]       | [-16.27]         |
| CBS Limit | [+4.09]         | [-13.42]      | [-2.61]        | [-4.81]       | [+0.50]     | [-0.40]       | [-16.66]         |

## 2.8 M4 [HCa( $\mu_2$ -H) $_2$ CaH] $D_{2h}$

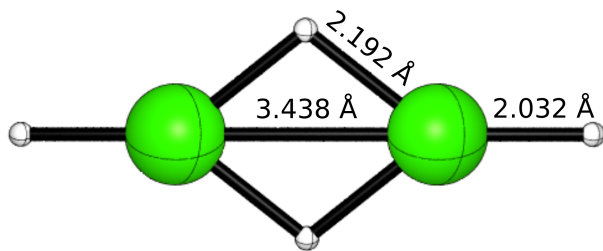

### Level of Theory:

Geometry: CCSD(T)/QZ

Harmonics: CCSD(T)/QZ

Anharmonics: CCSD(T)/TZ

### Wavefunction Diagnostics:

T1 = 0.009 D1 = 0.028

Figure S8: M4

Cartesian Coordinates of Optimized Geometry (Å):

|    |              |               |               |
|----|--------------|---------------|---------------|
| Ca | 0.0000000000 | 0.0000000000  | 1.7191306432  |
| Ca | 0.0000000000 | 0.0000000000  | -1.7191306432 |
| H  | 0.0000000000 | 1.3606949333  | 0.0000000000  |
| H  | 0.0000000000 | -1.3606949333 | 0.0000000000  |
| H  | 0.0000000000 | 0.0000000000  | -3.7512220621 |
| H  | 0.0000000000 | 0.0000000000  | 3.7512220621  |

Rotational Constants (GHz): 1.879, 1.905, 135.404

Vibrational Frequencies ( $\text{cm}^{-1}$ ):

| Mode | Symmetry | $\omega$ | $\delta\nu$ | $\nu$  | Intensity | VCI <sup>a</sup> |
|------|----------|----------|-------------|--------|-----------|------------------|
| 1    | $a_g$    | 1309.7   | -37.3       | 1272.4 | 0.0       | 1264.9           |
| 2    | $a_g$    | 1009.3   | 13.3        | 1022.6 | 0.0       | 996.6            |
| 3    | $a_g$    | 212.0    | -5.4        | 206.6  | 0.0       | 209.1            |
| 4    | $b_{1g}$ | 1008.8   | -57.0       | 951.8  | 0.0       | 933.9            |
| 5    | $b_{1g}$ | 241.9    | 3.3         | 245.2  | 0.0       | 241.1            |
| 6    | $b_{2g}$ | 87.8     | 22.8        | 110.6  | 0.0       | 179.0            |
| 7    | $b_{1u}$ | 498.4    | -2.4        | 496.0  | 731.9     | 519.9            |
| 8    | $b_{1u}$ | 103.2    | 15.4        | 118.6  | 651.8     | 169.0            |
| 9    | $b_{2u}$ | 904.4    | -28.1       | 876.3  | 844.0     | 849.5            |
| 10   | $b_{2u}$ | 223.5    | 5.6         | 229.1  | 611.1     | 236.2            |
| 11   | $b_{3u}$ | 1299.5   | -42.0       | 1257.5 | 566.3     | 1237.7           |
| 12   | $b_{3u}$ | 1120.7   | -64.3       | 1056.4 | 1486.1    | 1035.7           |

<sup>a</sup> Multi-level vibration configuration interaction frequencies <sup>4</sup>

\* $\nu_2$  corrected for resonance with  $2\nu_7$

\* $\nu_{11}$  corrected for resonance with  $\nu_6 + \nu_8$

Focal Point Analysis (in  $\text{kcal mol}^{-1}$ ) relative to  $\text{Ca}_2 + 2\text{H}_2$ :

| Basis     | $\Delta E_e$ HF | $+\delta$ MP2 | $+\delta$ CCSD | $+\delta$ (T) | $+\delta$ T | $+\delta$ (Q) | $\Delta E_e$ Net |
|-----------|-----------------|---------------|----------------|---------------|-------------|---------------|------------------|
| cc-pwCVDZ | -37.87          | +8.44         | -5.00          | +1.42         | +0.03       | +0.33         | [-32.66]         |
| cc-pwCVTZ | -37.07          | +3.49         | -5.25          | +2.20         | -0.13       | [+0.33]       | [-36.43]         |
| cc-pwCVQZ | -37.40          | +1.78         | -5.15          | +2.27         | [-0.13]     | [+0.33]       | [-38.30]         |
| cc-pwCV5Z | -37.40          | +1.26         | -5.25          | +2.31         | [-0.13]     | [+0.33]       | [-38.87]         |
| CBS Limit | [-37.37]        | [+0.71]       | [-5.35]        | [+2.36]       | [-0.13]     | [+0.33]       | [-39.45]         |

## 2.9 M5 [HCa( $\mu_2$ -H)<sub>3</sub>Ca] $C_{3v}$

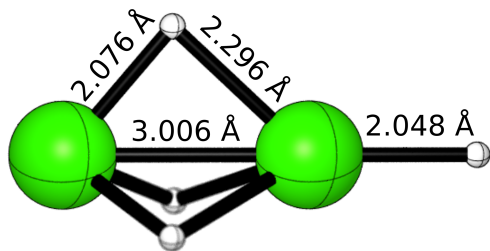

### Level of Theory:

Geometry: CCSD(T)/QZ

Harmonics: CCSD(T)/QZ

Anharmonics: CCSD(T)/DZ

### Wavefunction Diagnostics:

T1 = 0.011 D1 = 0.029

Figure S9: M5

Cartesian Coordinates of Optimized Geometry (Å):

|    |               |               |               |
|----|---------------|---------------|---------------|
| Ca | 0.0000000000  | 0.0000000000  | 1.4663417338  |
| Ca | -0.0000000000 | 0.0000000000  | -1.5398961593 |
| H  | 1.5833387792  | 0.0000000000  | -0.1965133772 |
| H  | -0.7916693896 | -1.3712116056 | -0.1965133772 |
| H  | -0.7916693896 | 1.3712116056  | -0.1965133772 |
| H  | 0.0000000000  | 0.0000000000  | 3.5143782916  |

Rotational Constants (GHz): 2.558, 2.558, 66.667

Dipole Moment (Debye): 0.0, 0.0, 10.72

Vibrational Frequencies ( $\text{cm}^{-1}$ ):

| Mode | Symmetry | $\omega$ | $\delta\nu$ | $\nu$  | Intensity |
|------|----------|----------|-------------|--------|-----------|
| 1    | $a'$     | 1260.8   | -37.8       | 1223.0 | 550.6     |
| 2    | $a'$     | 1229.7   | -61.5       | 1168.2 | 39.2      |
| 3    | $a'$     | 911.3    | -60.9       | 850.4  | 1121.8    |
| 4    | $a'$     | 262.2    | -7.5        | 254.7  | 0.0       |
| 5    | $e$      | 1114.8   | -41.2       | 1073.6 | 502.2     |
| 6    | $e$      | 726.8    | -45.0       | 681.8  | 88.6      |
| 7    | $e$      | 622.2    | -29.2       | 593.0  | 700.3     |
| 8    | $e$      | 236.5    | 2.5         | 239.0  | 283.4     |

Focal Point Analysis (in  $\text{kcal mol}^{-1}$ ) relative to  $\text{Ca}_2 + 2 \text{H}_2$ :

| Basis     | $\Delta E_e$ HF | $+\delta$ MP2 | $+\delta$ CCSD | $+\delta$ (T) | $+\delta$ T | $+\delta$ (Q) | $\Delta E_e$ Net |
|-----------|-----------------|---------------|----------------|---------------|-------------|---------------|------------------|
| cc-pwCVDZ | -33.46          | +5.25         | -4.08          | +0.94         | -0.05       | +0.31         | [-31.10]         |
| cc-pwCVTZ | -33.00          | -1.81         | -4.15          | +1.42         | -0.23       | [+0.31]       | [-37.46]         |
| cc-pwCVQZ | -33.49          | -4.01         | -4.03          | +1.39         | [-0.23]     | [+0.31]       | [-40.06]         |
| cc-pwCV5Z | -33.51          | -4.72         | -4.13          | +1.39         | [-0.23]     | [+0.31]       | [-40.88]         |
| CBS Limit | [-33.48]        | [-5.46]       | [-4.23]        | [+1.39]       | [-0.23]     | [+0.31]       | [-41.70]         |

## 2.10 M6 [Ca( $\mu_2$ -H)<sub>4</sub>Ca] $D_{4h}$

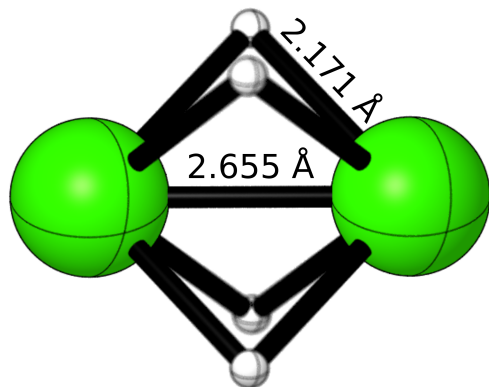

### Level of Theory:

Geometry: CCSD(T)/QZ

Harmonics: CCSD(T)/QZ

Anharmonics: CCSD(T)/TZ

### Wavefunction Diagnostics:

T1 = 0.014 D1 = 0.041

Figure S10: M6

Cartesian Coordinates of Optimized Geometry (Å):

|    |               |               |               |
|----|---------------|---------------|---------------|
| Ca | 0.0000000000  | 0.0000000000  | 1.3277090839  |
| Ca | 0.0000000000  | 0.0000000000  | -1.3277090839 |
| H  | 1.7177315542  | 0.0000000000  | 0.0000000000  |
| H  | 0.0000000000  | -1.7177315542 | 0.0000000000  |
| H  | 0.0000000000  | 1.7177315542  | 0.0000000000  |
| H  | -1.7177315542 | 0.0000000000  | 0.0000000000  |

Rotational Constants (GHz): 3.432, 3.432, 42.483

Vibrational Frequencies ( $\text{cm}^{-1}$ ):

Focal Point Analysis:

| Mode | Symmetry | $\omega$ | $\delta\nu$ | $\nu$  | Intensity |
|------|----------|----------|-------------|--------|-----------|
| 1    | $a_{1g}$ | 1149.5   | -50.9       | 1098.6 | 0.0       |
| 2    | $a_{1g}$ | 325.8    | -21.0       | 304.8  | 0.0       |
| 3    | $b_{1g}$ | 906.6    | -84.4       | 822.2  | 0.0       |
| 4    | $b_{2g}$ | 912.0    | -32.7       | 879.3  | 0.0       |
| 5    | $e_g$    | 662.5    | -97.1       | 565.4  | 0.0       |
| 6    | $a_{2u}$ | 984.0    | -131.6*     | 852.4  | 1150.5    |
| 7    | $b_{2u}$ | 443.2    | -83.9       | 359.3  | 0.0       |
| 8    | $e_u$    | 1000.1   | -115.9*     | 884.2  | 969.8     |
| 9    | $e_u$    | 722.5    | -41.4       | 681.1  | 687.1     |

\*Corrected for resonance with  $\nu_3 + \nu_7$

\*Corrected for resonance with  $\nu_5 + \nu_7$

Focal Point Analysis (in  $\text{kcal mol}^{-1}$ ) relative to  $\text{Ca}_2 + 2 \text{H}_2$ :

| Basis     | $\Delta E_e$ HF | $+\delta$ MP2 | $+\delta$ CCSD | $+\delta$ (T) | $+\delta$ T | $+\delta$ (Q) | $\Delta E_e$ Net |
|-----------|-----------------|---------------|----------------|---------------|-------------|---------------|------------------|
| cc-pwCVDZ | +0.40           | -0.61         | -2.71          | -0.02         | -0.15       | +0.26         | [-2.84]          |
| cc-pwCVTZ | -0.40           | -10.72        | -2.51          | -0.02         | -0.38       | [+0.26]       | [-13.77]         |
| cc-pwCVQZ | -1.06           | -13.87        | -2.35          | -0.26         | [-0.38]     | [+0.26]       | [-17.67]         |
| cc-pwCV5Z | -1.11           | -14.85        | -2.47          | -0.32         | [-0.38]     | [+0.26]       | [-18.87]         |
| CBS Limit | [-1.10]         | [-15.88]      | [-2.58]        | [-0.39]       | [-0.38]     | [+0.26]       | [-20.07]         |

## 2.11 TS1 [M1 → M2] $C_s$

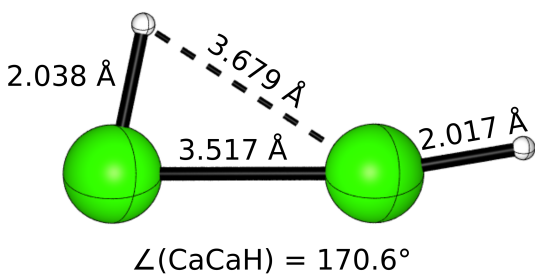

### Level of Theory:

Geometry: CCSD(T)/QZ

Harmonics: CCSD(T)/QZ

### Wavefunction Diagnostics:

T1 = 0.018    D1 = 0.072

Figure S11: TS1

Cartesian Coordinates of Optimized Geometry (Å):

|    |               |              |               |
|----|---------------|--------------|---------------|
| Ca | -0.0388331350 | 0.0000000000 | -1.7879951405 |
| Ca | -0.0185263908 | 0.0000000000 | 1.7290865569  |
| H  | 1.9571521570  | 0.0000000000 | -1.3746679637 |
| H  | 0.3237076095  | 0.0000000000 | 3.7171248854  |

Rotational Constants (GHz): 1.887, 1.916, 125.073

Harmonic Vibrational Frequencies ( $\text{cm}^{-1}$ ):

[ $a'$ ] 1300.5    [ $a''$ ] 138.0  
 [ $a'$ ] 1200.6  
 [ $a'$ ] 176.2  
 [ $a'$ ] 141.0  
 [ $a'$ ] 414.1 i

Focal Point Analysis (in  $\text{kcal mol}^{-1}$ ) relative to  $\text{Ca}_2 + \text{H}_2$ :

| Basis     | $\Delta E_e$ HF | $+\delta$ MP2 | $+\delta$ CCSD | $+\delta$ (T) | $+\delta$ T | $+\delta$ (Q) | $\Delta E_e$ Net |
|-----------|-----------------|---------------|----------------|---------------|-------------|---------------|------------------|
| cc-pwCVDZ | +11.51          | +7.35         | -4.16          | +0.23         | -0.15       | +0.20         | [+14.98]         |
| cc-pwCVTZ | +11.45          | +2.67         | -4.59          | +0.67         | -0.31       | [+0.20]       | [+10.08]         |
| cc-pwCVQZ | +11.24          | +1.28         | -4.54          | +0.71         | [-0.31]     | [+0.20]       | [+8.57]          |
| cc-pwCV5Z | +11.22          | +0.73         | -4.55          | +0.72         | [-0.31]     | [+0.20]       | [+8.00]          |
| CBS Limit | [+11.22]        | [+0.16]       | [-4.56]        | [+0.73]       | [-0.31]     | [+0.20]       | [+7.43]          |



## 2.12 TS2 [M2 → M3] C<sub>1</sub>

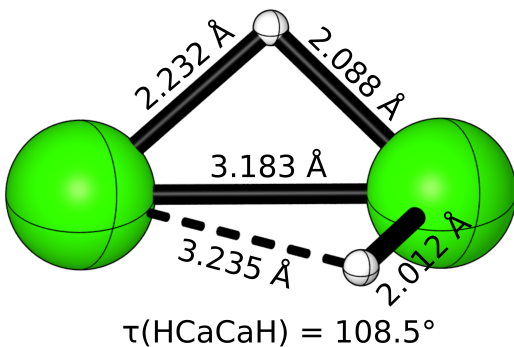

### Level of Theory:

Geometry: CCSD(T)/QZ

Harmonics: CCSD(T)/QZ

### Wavefunction Diagnostics:

T1 = 0.028    D1 = 0.122

Figure S12: TS2

Cartesian Coordinates of Optimized Geometry (Å):

|    |               |               |               |
|----|---------------|---------------|---------------|
| Ca | -0.0262236978 | -0.0266326153 | -1.5776078551 |
| Ca | 0.0020137363  | -0.0162044547 | 1.6050905027  |
| H  | -0.8581004550 | 1.1676405901  | -0.0807079782 |
| H  | 1.8207919405  | 0.5357442965  | -1.0121194880 |

Rotational Constants (GHz): 2.428, 2.456, 86.925

Harmonic Vibrational Frequencies (cm<sup>-1</sup>):

- [a] 1256.1
- [a] 1062.8
- [a] 786.2
- [a] 466.1
- [a] 216.4
- [a] 371.7 i

Focal Point Analysis (in kcal mol<sup>-1</sup>) relative to Ca<sub>2</sub> + H<sub>2</sub>:

| Basis     | $\Delta E_e$ HF | $+\delta$ MP2 | $+\delta$ CCSD | $+\delta$ (T) | $+\delta$ T | $+\delta$ (Q) | $\Delta E_e$ Net |
|-----------|-----------------|---------------|----------------|---------------|-------------|---------------|------------------|
| cc-pwCVDZ | +13.34          | +1.81         | -3.84          | -0.91         | -0.35       | +0.02         | [+10.06]         |
| cc-pwCVTZ | +13.03          | -3.20         | -3.90          | -0.82         | -0.21       | [+0.02]       | [+4.92]          |
| cc-pwCVQZ | +12.69          | -4.76         | -3.81          | -0.88         | [-0.21]     | [+0.02]       | [+3.05]          |
| cc-pwCV5Z | +12.65          | -5.34         | -3.87          | -0.91         | [-0.21]     | [+0.02]       | [+2.33]          |
| CBS Limit | [+12.65]        | [-5.96]       | [-3.94]        | [-0.94]       | [-0.21]     | [+0.02]       | [+1.63]          |

### 2.13 TS3 [M2 → M2] $C_{2v}$

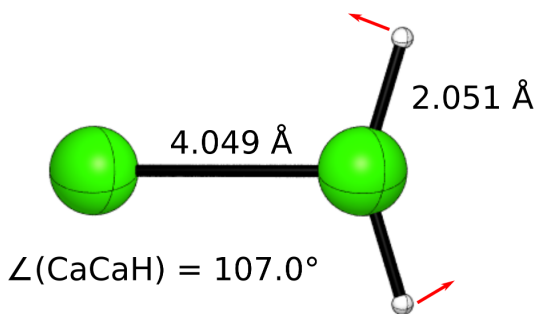

**Level of Theory:**

Geometry: CCSD(T)/QZ

Harmonics: CCSD(T)/QZ

**Wavefunction Diagnostics:**

T1 = 0.014 D1 = 0.057

Figure S13: TS3

Cartesian Coordinates of Optimized Geometry (Å):

|    |              |               |               |
|----|--------------|---------------|---------------|
| Ca | 0.0000000000 | 0.0000000000  | -1.9601554665 |
| Ca | 0.0000000000 | 0.0000000000  | 2.0889192444  |
| H  | 0.0000000000 | 1.9609228149  | -2.5600989227 |
| H  | 0.0000000000 | -1.9609228149 | -2.5600989227 |

Rotational Constants (GHz): 11.445, 1.477, 65.198

Harmonic Vibrational Frequencies ( $\text{cm}^{-1}$ ):

|         |        |         |       |         |        |
|---------|--------|---------|-------|---------|--------|
| $[a_1]$ | 1289.6 | $[b_1]$ | 142.6 | $[b_2]$ | 1226.1 |
| $[a_1]$ | 273.6  |         |       | $[b_2]$ | 58.3 i |
| $[a_1]$ | 82.4   |         |       |         |        |

Focal Point Analysis (in  $\text{kcal mol}^{-1}$ ) relative to  $\text{Ca}_2 + \text{H}_2$ :

| Basis | $\Delta E_e$ HF | $+\delta$ MP2 | $+\delta$ CCSD | $+\delta$ (T) | $+\delta$ T | $+\delta$ (Q) | $\Delta E_e$ Net |
|-------|-----------------|---------------|----------------|---------------|-------------|---------------|------------------|
| DZ    | +3.52           | +4.93         | -3.30          | +0.81         | +0.03       | +0.21         | [+6.21]          |
| TZ    | +3.81           | +2.53         | -3.34          | +1.25         | -0.06       | [+0.21]       | [+4.41]          |
| QZ    | +3.68           | +1.81         | -3.32          | +1.32         | [-0.06]     | [+0.21]       | [+3.64]          |
| 5Z    | +3.67           | +1.60         | -3.38          | +1.35         | [-0.06]     | [+0.21]       | [+3.39]          |
| CBS   | [+3.67]         | [+1.37]       | [-3.45]        | [+1.39]       | [-0.06]     | [+0.21]       | [+3.14]          |

## 2.14 TS4 [M4 → M5] $C_s$

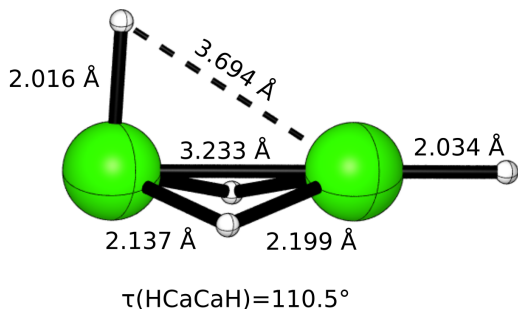

### Level of Theory:

Geometry: CCSD(T)/QZ

Harmonics: CCSD(T)/QZ

### Wavefunction Diagnostics:

T1 = 0.011    D1 = 0.032

Figure S14: TS4

Cartesian Coordinates of Optimized Geometry (Å):

|    |               |               |               |
|----|---------------|---------------|---------------|
| Ca | -0.0342337971 | 0.0000000000  | 1.6412469180  |
| Ca | 0.0095673719  | 0.0000000000  | -1.5916399183 |
| H  | -0.5177970839 | 1.3536556151  | 0.0593662170  |
| H  | -0.5177970839 | -1.3536556151 | 0.0593662170  |
| H  | 0.0371173529  | 0.0000000000  | -3.6250553028 |
| H  | 1.9793192481  | 0.0000000000  | 1.5337366544  |

Rotational Constants (GHz): 2.201, 2.209, 61.368

Harmonic Vibrational Frequencies ( $\text{cm}^{-1}$ ):

|        |         |         |        |
|--------|---------|---------|--------|
| $[a']$ | 1296.7  | $[a'']$ | 1007.7 |
| $[a']$ | 1290.7  | $[a'']$ | 906.6  |
| $[a']$ | 1118.1  | $[a'']$ | 461.6  |
| $[a']$ | 1012.7  | $[a'']$ | 242.5  |
| $[a']$ | 604.9   |         |        |
| $[a']$ | 260.0   |         |        |
| $[a']$ | 168.4   |         |        |
| $[a']$ | 253.2 i |         |        |

Focal Point Analysis (in  $\text{kcal mol}^{-1}$ ) relative to  $\text{Ca}_2 + 2 \text{H}_2$ :

| Basis     | $\Delta E_e$ HF | $+\delta$ MP2 | $+\delta$ CCSD | $+\delta$ (T) | $+\delta$ T | $+\delta$ (Q) | $\Delta E_e$ Net |
|-----------|-----------------|---------------|----------------|---------------|-------------|---------------|------------------|
| cc-pwCVDZ | -29.50          | +6.98         | -4.66          | +1.16         | -0.02       | +0.32         | [-25.72]         |
| cc-pwCVTZ | -28.92          | +1.06         | -4.81          | +1.81         | -0.19       | [+0.32]       | [-30.74]         |
| cc-pwCVQZ | -29.35          | -0.90         | -4.71          | +1.83         | [-0.19]     | [+0.32]       | [-33.01]         |
| cc-pwCV5Z | -29.36          | -1.50         | -4.81          | +1.85         | [-0.19]     | [+0.32]       | [-33.69]         |
| CBS Limit | [-29.34]        | [-2.13]       | [-4.91]        | [+1.88]       | [-0.19]     | [+0.32]       | [-34.38]         |

## 2.15 TS5 [M5 → M6] $C_s$

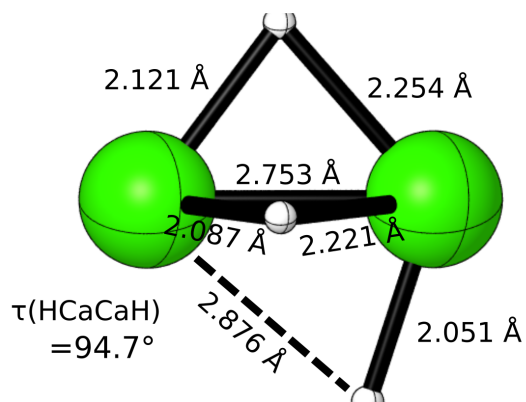

### Level of Theory:

Geometry: CCSD(T)/QZ

Harmonics: CCSD(T)/QZ

### Wavefunction Diagnostics:

T1 = 0.014 D1 = 0.042

Figure S15: TS5

Cartesian Coordinates of Optimized Geometry (Å):

|    |               |               |               |
|----|---------------|---------------|---------------|
| Ca | 0.0088970719  | 0.0000000000  | 1.3815011294  |
| Ca | -0.0213019239 | 0.0000000000  | -1.3712506861 |
| H  | 0.1306651205  | 1.6493635592  | 0.1087810383  |
| H  | 0.1306651205  | -1.6493635592 | 0.1087810383  |
| H  | -1.7031456868 | 0.0000000000  | 0.1288988145  |
| H  | 1.9350853520  | 0.0000000000  | -0.7540623039 |

Rotational Constants (GHz): 3.174, 3.199, 41.297

Harmonic Vibrational Frequencies ( $\text{cm}^{-1}$ ):

|        |         |         |        |
|--------|---------|---------|--------|
| $[a']$ | 1184.6  | $[a'']$ | 1077.4 |
| $[a']$ | 1168.9  | $[a'']$ | 843.5  |
| $[a']$ | 998.5   | $[a'']$ | 743.6  |
| $[a']$ | 891.0   | $[a'']$ | 581.3  |
| $[a']$ | 722.1   |         |        |
| $[a']$ | 552.0   |         |        |
| $[a']$ | 332.9   |         |        |
| $[a']$ | 415.6 i |         |        |

Focal Point Analysis (in  $\text{kcal mol}^{-1}$ ) relative to  $\text{Ca}_2 + 2 \text{H}_2$ :

| Basis     | $\Delta E_e$ HF | $+\delta$ MP2 | $+\delta$ CCSD | $+\delta$ (T) | $+\delta$ T | $+\delta$ (Q) | $\Delta E_e$ Net |
|-----------|-----------------|---------------|----------------|---------------|-------------|---------------|------------------|
| cc-pwCVDZ | +0.86           | +0.75         | -3.28          | +0.16         | -0.16       | +0.27         | [-1.40]          |
| cc-pwCVTZ | +0.36           | -8.45         | -3.14          | +0.28         | -0.37       | [+0.27]       | [-11.07]         |
| cc-pwCVQZ | -0.25           | -11.30        | -3.00          | +0.10         | [-0.37]     | [+0.27]       | [-14.55]         |
| cc-pwCV5Z | -0.29           | -12.20        | -3.11          | +0.06         | [-0.37]     | [+0.27]       | [-15.65]         |
| CBS Limit | [-0.28]         | [-13.15]      | [-3.21]        | [+0.01]       | [-0.37]     | [+0.27]       | [-16.74]         |

## 2.16 TS6 [M5 → M5] $C_{2v}$

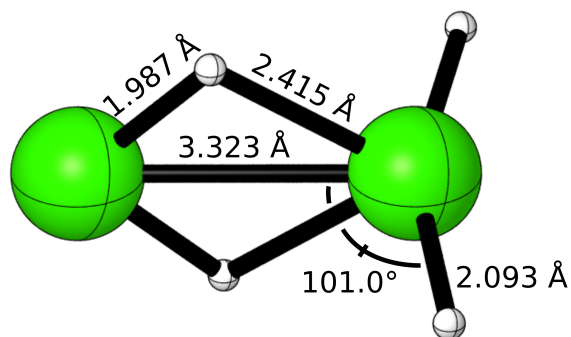

### Level of Theory:

Geometry: CCSD(T)/QZ

Harmonics: CCSD(T)/QZ

### Wavefunction Diagnostics:

T1 = 0.012 D1 = 0.037

Figure S16: TS6

Cartesian Coordinates of Optimized Geometry (Å):

|    |               |               |               |
|----|---------------|---------------|---------------|
| Ca | 0.0000000000  | 0.0000000000  | -1.7041825128 |
| Ca | 0.0000000000  | 0.0000000000  | 1.6191248212  |
| H  | 0.0000000000  | 1.4310774680  | -0.3261232328 |
| H  | 0.0000000000  | -1.4310774680 | -0.3261232328 |
| H  | -2.0548888039 | 0.0000000000  | 2.0172518114  |
| H  | 2.0548888039  | 0.0000000000  | 2.0172518114  |

Rotational Constants (GHz): 2.120, 2.160, 39.980

Harmonic Vibrational Frequencies ( $\text{cm}^{-1}$ ):

|                   |        |                   |       |                   |         |                   |        |
|-------------------|--------|-------------------|-------|-------------------|---------|-------------------|--------|
| [a <sub>1</sub> ] | 1378.7 | [a <sub>2</sub> ] | 389.7 | [b <sub>1</sub> ] | 1146.8  | [b <sub>2</sub> ] | 1312.3 |
| [a <sub>1</sub> ] | 1218.8 |                   |       | [b <sub>1</sub> ] | 526.4   | [b <sub>2</sub> ] | 506.5  |
| [a <sub>1</sub> ] | 739.6  |                   |       | [b <sub>1</sub> ] | 258.7 i | [b <sub>2</sub> ] | 259.5  |
| [a <sub>1</sub> ] | 272.1  |                   |       |                   |         |                   |        |
| [a <sub>1</sub> ] | 112.4  |                   |       |                   |         |                   |        |

Focal Point Analysis (in  $\text{kcal mol}^{-1}$ ) relative to  $\text{Ca}_2 + 2 \text{H}_2$ :

| Basis     | $\Delta E_e$ HF | $+\delta$ MP2 | $+\delta$ CCSD | $+\delta$ (T) | $+\delta$ T | $+\delta$ (Q) | $\Delta E_e$ Net |
|-----------|-----------------|---------------|----------------|---------------|-------------|---------------|------------------|
| cc-pwCVDZ | -3.01           | +7.07         | -5.01          | +1.11         | -0.06       | +0.32         | [+0.42]          |
| cc-pwCVTZ | -2.43           | +1.47         | -5.17          | +1.78         | -0.22       | [+0.32]       | [-4.25]          |
| cc-pwCVQZ | -2.86           | -0.35         | -5.07          | +1.82         | [-0.22]     | [+0.32]       | [-6.36]          |
| cc-pwCV5Z | -2.88           | -0.92         | -5.16          | +1.85         | [-0.22]     | [+0.32]       | [-7.02]          |
| CBS Limit | [-2.86]         | [-1.52]       | [-5.27]        | [+1.88]       | [-0.22]     | [+0.32]       | [-7.68]          |

### 3 M5 vs. M4 Thermodynamical Analysis

Using the rigid rotor harmonic oscillator approximation we have computed the difference in Gibbs free energy ( $\Delta G_T$ ) between the tribridged (M5) and dibridged (M4) isomers of  $\text{Ca}_2\text{H}_4$ . The CCSD(T)/QZ rotational constants and fundamental frequencies were used for this analysis.

| Temp (K) | $\Delta H(T)$ (kcal mol <sup>-1</sup> ) | $\Delta S(T)$ (cal mol <sup>-1</sup> ) | $\Delta G(T)$ (kcal mol <sup>-1</sup> ) | $K_{\text{eq}}$ |
|----------|-----------------------------------------|----------------------------------------|-----------------------------------------|-----------------|
| 100      | -0.970                                  | -1.933                                 | -0.777                                  | 2484.6          |
| 200      | -1.315                                  | -4.341                                 | -0.446                                  | 3.073           |
| 300      | -1.548                                  | -5.306                                 | 0.044                                   | 0.929           |
| 400      | -1.682                                  | -5.696                                 | 0.596                                   | 0.472           |
| 500      | -1.760                                  | -5.872                                 | 1.176                                   | 0.306           |
| 600      | -1.809                                  | -5.961                                 | 1.768                                   | 0.227           |
| 700      | -1.841                                  | -6.011                                 | 2.367                                   | 0.182           |
| 800      | -1.863                                  | -6.041                                 | 2.970                                   | 0.154           |
| 900      | -1.880                                  | -6.060                                 | 3.575                                   | 0.136           |
| 1000     | -1.892                                  | -6.074                                 | 4.181                                   | 0.122           |

## 4 Relaxed Surface Scans

### 4.1 2 CaH $\rightarrow$ M1

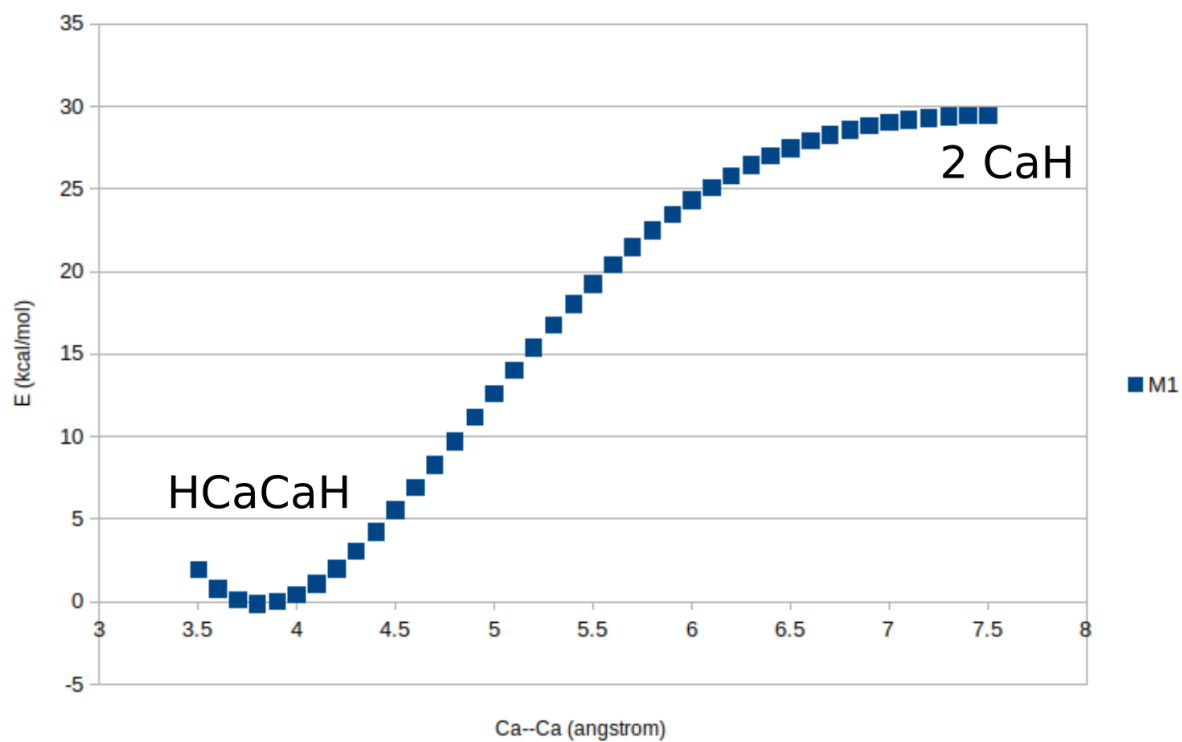

Figure S17: CCSD(T)/DZ//MP2/DZ relaxed surface scan of 2 CaH  $\rightarrow$  M1 approach

## 4.2 $\text{CaH}_2 + \text{Ca} \rightarrow \text{M2}$

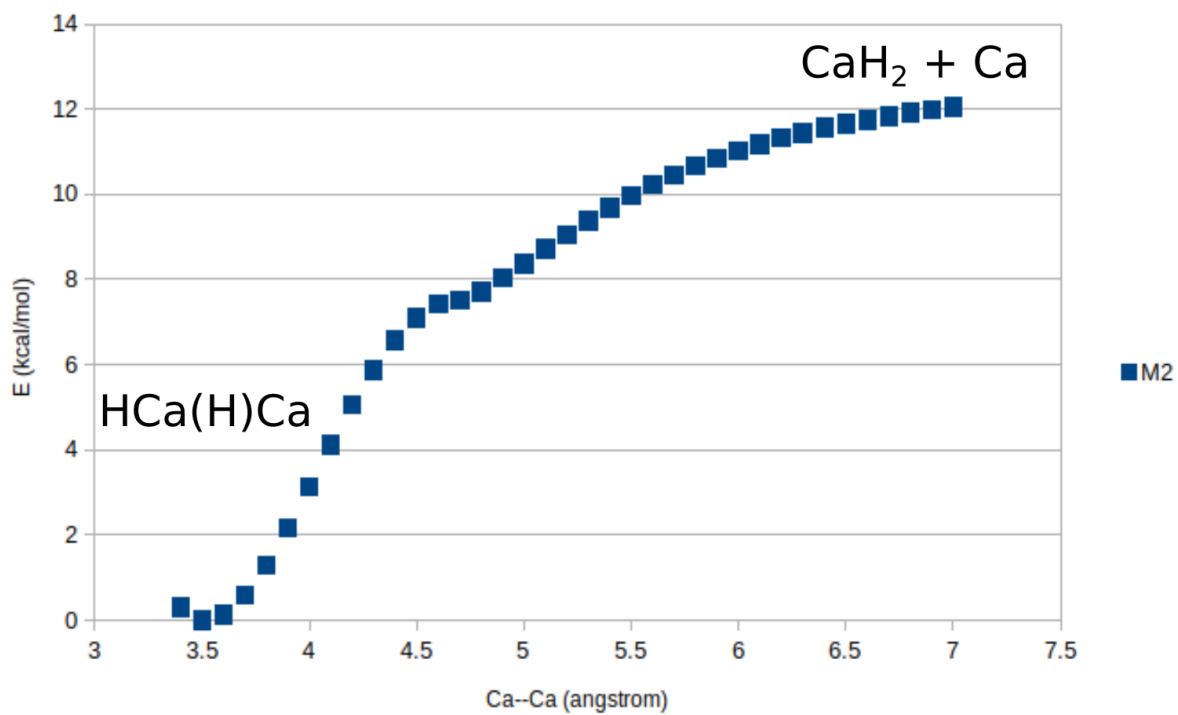

Figure S18: CCSD(T)/DZ//MP2/DZ relaxed surface scan of  $\text{CaH}_2 + \text{Ca} \rightarrow \text{M2}$  approach



### 4.3 $2 \text{CaH}_2 \rightarrow \text{Ca}_2\text{H}_4$

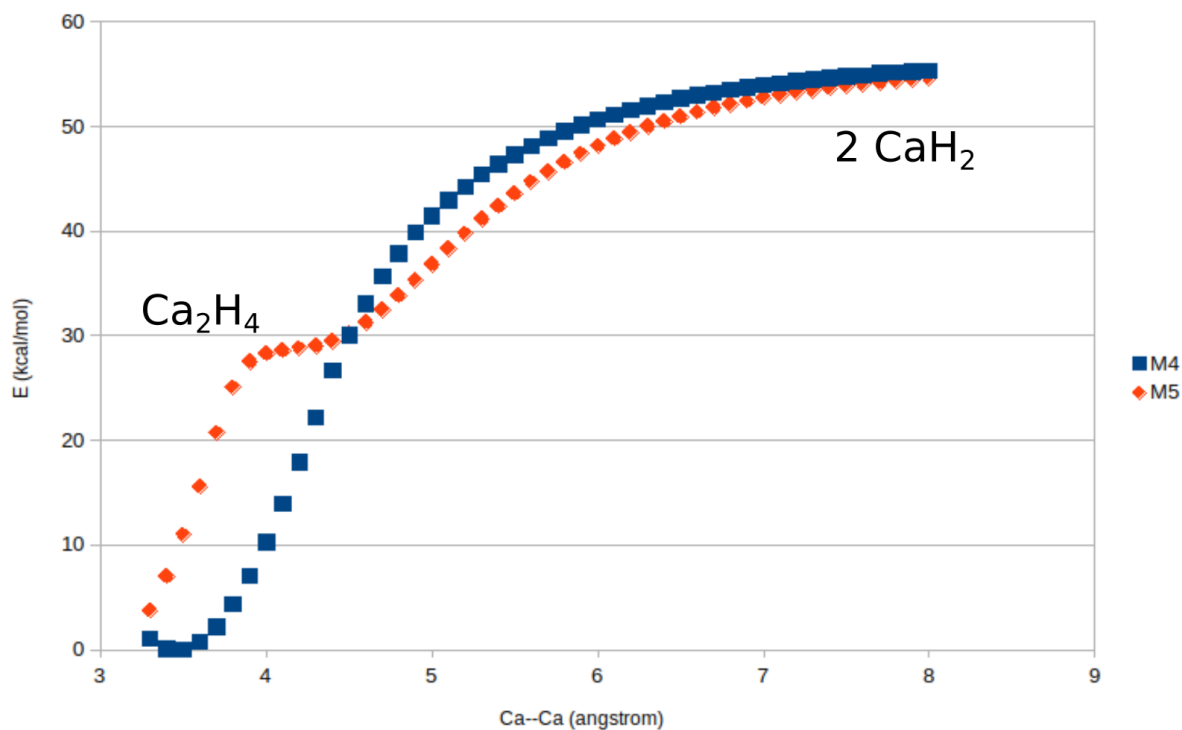

Figure S19: CCSD(T)/DZ//MP2/DZ relaxed surface scan of  $2 \text{CaH}_2 \rightarrow \text{Ca}_2\text{H}_4$

Notice that while both approaches appear barrierless, the steeper slope in the 4-5 Å region suggests that the formation of dibridged  $\text{Ca}_2\text{H}_4$  will be more rapid than tribridged  $\text{Ca}_2\text{H}_4$  which is in agreement with experiment.

## 5 QSD Reaction Paths

### 5.1 M1 → TS1 → M2

|             |               |              |               |
|-------------|---------------|--------------|---------------|
| 4           |               |              |               |
| QSD point 1 |               |              |               |
| Ca          | -0.0000025339 | 0.0000000000 | -1.9019348901 |
| Ca          | 0.0000231298  | 0.0000000000 | 1.9019347037  |
| H           | -0.0001638705 | 0.0000000000 | -3.9510865200 |
| H           | -0.0006551102 | 0.0000005813 | 3.9510939314  |
| 4           |               |              |               |
| QSD point 2 |               |              |               |
| Ca          | -0.0002114596 | 0.0000000000 | -1.9020149334 |
| Ca          | 0.0002726777  | 0.0000000000 | 1.9020087782  |
| H           | 0.0034165302  | 0.0000000000 | -3.9509555416 |
| H           | -0.0058508199 | 0.0000000000 | 3.9512003005  |
| 4           |               |              |               |
| QSD point 3 |               |              |               |
| Ca          | -0.0015381690 | 0.0000000000 | -1.9019743084 |
| Ca          | 0.0010710155  | 0.0000000000 | 1.9019666470  |
| H           | 0.0342614004  | 0.0000000000 | -3.9507877987 |
| H           | -0.0156853832 | 0.0000000000 | 3.9510924506  |
| 4           |               |              |               |
| QSD point 4 |               |              |               |
| Ca          | -0.0087885290 | 0.0000000000 | -1.8992942710 |
| Ca          | 0.0015892758  | 0.0000000000 | 1.8989270621  |
| H           | 0.2428538780  | 0.0000000000 | -3.9330401738 |
| H           | 0.0434191814  | 0.0000000000 | 3.9476419678  |
| 4           |               |              |               |
| QSD point 5 |               |              |               |
| Ca          | -0.0190710771 | 0.0000000000 | -1.8933083087 |
| Ca          | 0.0015218367  | 0.0000000000 | 1.8914234370  |
| H           | 0.5511123835  | 0.0000000000 | -3.8607127022 |
| H           | 0.1467203791  | 0.0000000000 | 3.9356632502  |
| 4           |               |              |               |
| QSD point 6 |               |              |               |
| Ca          | -0.0290204841 | 0.0000000000 | -1.8858915490 |
| Ca          | 0.0013327621  | 0.0000000000 | 1.8811545216  |
| H           | 0.8617220014  | 0.0000000000 | -3.7288073260 |
| H           | 0.2392601016  | 0.0000000000 | 3.9171717704  |
| 4           |               |              |               |
| QSD point 7 |               |              |               |
| Ca          | -0.0378661979 | 0.0000000000 | -1.8776262730 |
| Ca          | 0.0006629228  | 0.0000000000 | 1.8685518066  |
| H           | 1.1628572838  | 0.0000000000 | -3.5335664717 |
| H           | 0.3165038532  | 0.0000000000 | 3.8944060160  |
| 4           |               |              |               |
| QSD point 8 |               |              |               |
| Ca          | -0.0447134356 | 0.0000000000 | -1.8690653567 |
| Ca          | -0.0009219582 | 0.0000000000 | 1.8541801374  |
| H           | 1.4379330679  | 0.0000000000 | -3.2775861658 |
| H           | 0.3767251308  | 0.0000000000 | 3.8694860670  |
| 4           |               |              |               |
| QSD point 9 |               |              |               |
| Ca          | -0.0489525699 | 0.0000000000 | -1.8605415990 |
| Ca          | -0.0037642868 | 0.0000000000 | 1.8383915098  |
| H           | 1.6754106035  | 0.0000000000 | -2.9628783282 |
| H           | 0.4208368091  | 0.0000000000 | 3.8436604948  |
| 4           |               |              |               |

|              |               |               |               |
|--------------|---------------|---------------|---------------|
| QSD point 10 |               |               |               |
| Ca           | -0.0500547272 | 0.0000000000  | -1.8517665984 |
| Ca           | -0.0083116851 | 0.0000000000  | 1.8206635465  |
| H            | 1.8671208493  | 0.0000000000  | -2.5791461055 |
| H            | 0.4537770255  | 0.0000000000  | 3.8159363128  |
| 4            |               |               |               |
| QSD point 11 |               |               |               |
| Ca           | -0.0471288877 | 0.0000000000  | -1.8423387954 |
| Ca           | -0.0148699585 | 0.0000000000  | 1.7995731579  |
| H            | 1.9964617226  | 0.0000004613  | -2.0855795113 |
| H            | 0.4688772412  | -0.0000020243 | 3.7861239371  |
| 4            |               |               |               |
| QSD point 12 |               |               |               |
| Ca           | -0.0382450185 | 0.0000000000  | -1.8332618760 |
| Ca           | -0.0228455633 | 0.0000000000  | 1.7742738540  |
| H            | 1.9920100069  | 0.0000000000  | -1.4160775397 |
| H            | 0.4372124823  | 0.0000009173  | 3.7616932717  |
| 4            |               |               |               |
| QSD point 13 |               |               |               |
| Ca           | -0.0369317404 | 0.0000000000  | -1.8322116500 |
| Ca           | -0.0237113390 | 0.0000000000  | 1.7713660036  |
| H            | 1.9780708075  | 0.0000000000  | -1.3394470071 |
| H            | 0.4333570804  | 0.0000009177  | 3.7589298242  |
| 4            |               |               |               |
| QSD point 14 |               |               |               |
| Ca           | -0.0248208586 | 0.0000000000  | -1.8229237199 |
| Ca           | -0.0293022955 | 0.0000000000  | 1.7471281127  |
| H            | 1.7505474895  | 0.0000000000  | -0.7220073268 |
| H            | 0.4016203137  | 0.0000009956  | 3.7359644473  |
| 4            |               |               |               |
| QSD point 15 |               |               |               |
| Ca           | -0.0152462364 | 0.0000000000  | -1.8148839624 |
| Ca           | -0.0297524508 | 0.0000000000  | 1.7282535421  |
| H            | 1.4286627765  | 0.0000000000  | -0.2790980772 |
| H            | 0.3606772484  | 0.0000004468  | 3.7238936456  |
| 4            |               |               |               |
| QSD point 16 |               |               |               |
| Ca           | -0.0093051718 | 0.0000000000  | -1.8060538185 |
| Ca           | -0.0278623730 | 0.0000000000  | 1.7128536298  |
| H            | 1.1444002558  | 0.0000000000  | -0.0082128736 |
| H            | 0.3335400956  | 0.0000003678  | 3.7142504997  |
| 4            |               |               |               |
| QSD point 17 |               |               |               |
| Ca           | -0.0149724627 | 0.0000000000  | -1.7957456564 |
| Ca           | -0.0205894563 | 0.0000000000  | 1.7026624637  |
| H            | 1.3150154604  | 0.0000000000  | -0.0344151961 |
| H            | 0.0990783500  | -0.0000003011 | 3.7358005598  |
| 4            |               |               |               |
| QSD point 18 |               |               |               |
| Ca           | -0.0143087608 | 0.0000000000  | -1.7936060878 |
| Ca           | -0.0201558351 | 0.0000000000  | 1.6984077627  |
| H            | 1.2961031287  | 0.0000000000  | 0.0484931520  |
| H            | 0.0743564262  | 0.0000000000  | 3.7369989100  |
| 4            |               |               |               |
| QSD point 19 |               |               |               |
| Ca           | -0.0156012956 | 0.0000000000  | -1.8046790617 |
| Ca           | -0.0206812005 | 0.0000000000  | 1.7093856371  |
| H            | 1.3804285093  | 0.0000000000  | 0.0379590384  |
| H            | 0.0623185237  | 0.0000005317  | 3.7513145882  |

## 5.2 M2 → TS2 → M3

|                                              |
|----------------------------------------------|
| 4                                            |
| QSD Point 1                                  |
| Ca 0.0170817298 0.0006801828 -1.7108018037   |
| Ca 0.0161216135 -0.0002508203 1.8061490148   |
| H -1.3331614210 0.0000607318 -0.0393228315   |
| H 0.0128546551 -0.0171340167 -3.7520895770   |
| 4                                            |
| QSD Point 2                                  |
| Ca 0.0170785727 0.0007350899 -1.7109473820   |
| Ca 0.0161209429 -0.0002711589 1.8062741464   |
| H -1.3326291850 0.0000708187 -0.0381607931   |
| H 0.0124746301 -0.0185186972 -3.7524385620   |
| 4                                            |
| QSD Point 3                                  |
| Ca 0.0162837693 -0.0025176869 -1.7104223418  |
| Ca 0.0164578168 0.0009105270 1.8057615394    |
| H -1.3360272164 0.0008347773 -0.0401259357   |
| H 0.0340818929 0.0630727640 -3.7509678197    |
| 4                                            |
| QSD Point 4                                  |
| Ca 0.0142668910 -0.0098073549 -1.7091527343  |
| Ca 0.0172504548 0.0033642106 1.8040737416    |
| H -1.3395065607 0.0132139101 -0.0404240576   |
| H 0.0862422611 0.2429930296 -3.7340406638    |
| 4                                            |
| QSD Point 5                                  |
| Ca 0.0121242437 -0.0162783389 -1.7074704216  |
| Ca 0.0180652631 0.0052401041 1.8016454218    |
| H -1.3432357396 0.0394229412 -0.0428183820   |
| H 0.1427719907 0.3995044254 -3.7019819119    |
| 4                                            |
| QSD Point 6                                  |
| Ca 0.0081812893 -0.0246345179 -1.7044776015  |
| Ca 0.0194273389 0.0069744021 1.7970088415    |
| H -1.3439093063 0.1070300888 -0.0450942291   |
| H 0.2460723148 0.5952115536 -3.6343431357    |
| 4                                            |
| QSD Point 7                                  |
| Ca -0.0018389291 -0.0349372128 -1.6980658761 |
| Ca 0.0222022847 0.0066278208 1.7869270562    |
| H -1.3175274953 0.3177690341 -0.0506854725   |
| H 0.5077934891 0.8079333204 -3.4828146358    |
| 4                                            |
| QSD Point 8                                  |
| Ca -0.0156084591 -0.0387995436 -1.6912475350 |
| Ca 0.0245550830 0.0025189787 1.7758679733    |
| H -1.2174938058 0.6106796117 -0.0557723836   |
| H 0.8617378212 0.8319906266 -3.3090977171    |
| 4                                            |
| QSD Point 9                                  |
| Ca -0.0298114694 -0.0369457171 -1.6827672525 |
| Ca 0.0251204469 -0.0031011360 1.7618614448   |
| H -1.0529151651 0.8787611030 -0.0625997622   |
| H 1.2394502594 0.7136728451 -3.0825231865    |
| 4                                            |
| QSD Point 10                                 |
| Ca -0.0381328603 -0.0338211141 -1.6739690274 |

|              |               |               |               |
|--------------|---------------|---------------|---------------|
| Ca           | 0.0238563104  | -0.0068527255 | 1.7468805110  |
| H            | -0.9377701550 | 1.0149131567  | -0.0693075369 |
| H            | 1.5054667613  | 0.6024524550  | -2.8299645065 |
| 4            |               |               |               |
| QSD Point 11 |               |               |               |
| Ca           | -0.0423211112 | -0.0310772997 | -1.6624487065 |
| Ca           | 0.0207076792  | -0.0096793266 | 1.7268210015  |
| H            | -0.8695596449 | 1.0953940517  | -0.0793383846 |
| H            | 1.7290020269  | 0.5252635089  | -2.4803790403 |
| 4            |               |               |               |
| QSD Point 12 |               |               |               |
| Ca           | -0.0418274597 | -0.0293938631 | -1.6508158405 |
| Ca           | 0.0162244774  | -0.0116231277 | 1.7059526081  |
| H            | -0.8471722717 | 1.1368569805  | -0.0896691594 |
| H            | 1.8652562166  | 0.4941537854  | -2.1028042461 |
| 4            |               |               |               |
| QSD Point 13 |               |               |               |
| Ca           | -0.0386223317 | -0.0284210374 | -1.6408639193 |
| Ca           | 0.0116973768  | -0.0130240517 | 1.6876898112  |
| H            | -0.8490197933 | 1.1562408530  | -0.0973001129 |
| H            | 1.9196710154  | 0.4917929302  | -1.7646973749 |
| 4            |               |               |               |
| QSD Point 14 |               |               |               |
| Ca           | -0.0345385198 | -0.0277857485 | -1.6330007689 |
| Ca           | 0.0078879563  | -0.0141070115 | 1.6729048696  |
| H            | -0.8618591509 | 1.1621526917  | -0.1011795600 |
| H            | 1.9215994009  | 0.5036824006  | -1.4855779438 |
| 4            |               |               |               |
| QSD Point 15 |               |               |               |
| Ca           | -0.0310746330 | -0.0275970880 | -1.6267942270 |
| Ca           | 0.0054862980  | -0.0148153466 | 1.6621941314  |
| H            | -0.8813361090 | 1.1629695383  | -0.1079481630 |
| H            | 1.8988376147  | 0.5235300344  | -1.2997032550 |
| 4            |               |               |               |
| QSD Point 16 |               |               |               |
| Ca           | -0.0253181237 | -0.0262752602 | -1.6201290790 |
| Ca           | 0.0018339898  | -0.0160382481 | 1.6474118609  |
| H            | -0.8987381491 | 1.1381731371  | -0.0867346144 |
| H            | 1.8325676322  | 0.5443927040  | -0.9981453389 |
| 4            |               |               |               |
| QSD Point 17 |               |               |               |
| Ca           | -0.0237649697 | -0.0259503708 | -1.6185501471 |
| Ca           | 0.0010740899  | -0.0163317609 | 1.6438567732  |
| H            | -0.9060097210 | 1.1288877278  | -0.0810347682 |
| H            | 1.8082960298  | 0.5524304427  | -0.9252647892 |
| 4            |               |               |               |
| QSD Point 18 |               |               |               |
| Ca           | -0.0171585699 | -0.0245773895 | -1.6123463018 |
| Ca           | -0.0011770732 | -0.0174795009 | 1.6298746959  |
| H            | -0.9488962860 | 1.0749605602  | -0.0554870031 |
| H            | 1.6779997806  | 0.5974010570  | -0.6415168225 |
| 4            |               |               |               |
| QSD Point 19 |               |               |               |
| Ca           | -0.0126996303 | -0.0224452564 | -1.6131364350 |
| Ca           | -0.0020476971 | -0.0179512056 | 1.6245086531  |
| H            | -0.9722265443 | 0.9943225679  | -0.0088849145 |
| H            | 1.5586432786  | 0.6120133210  | -0.4433230540 |
| 4            |               |               |               |
| QSD Point 20 |               |               |               |

|              |               |               |               |
|--------------|---------------|---------------|---------------|
| Ca           | -0.0061947188 | -0.0202217527 | -1.6181527092 |
| Ca           | -0.0011655928 | -0.0179052546 | 1.6237032301  |
| H            | -1.0750835630 | 0.8512467584  | 0.0087841551  |
| H            | 1.3677609929  | 0.6648459192  | -0.2294965744 |
| 4            |               |               |               |
| QSD Point 21 |               |               |               |
| Ca           | -0.0004990841 | -0.0183806898 | -1.6257146028 |
| Ca           | 0.0007542555  | -0.0170289925 | 1.6287551690  |
| H            | -1.2198254440 | 0.7010197305  | -0.0268135037 |
| H            | 1.2096787387  | 0.7070205001  | -0.0940923982 |
| 4            |               |               |               |
| QSD Point 22 |               |               |               |
| Ca           | 0.0000749475  | -0.0163944911 | -1.6385622873 |
| Ca           | 0.0008182529  | -0.0156236065 | 1.6404841349  |
| H            | -1.2418991701 | 0.6271255239  | -0.0178489418 |
| H            | 1.2063817087  | 0.6460508065  | -0.0585719258 |
| 4            |               |               |               |
| QSD Point 23 |               |               |               |
| Ca           | 0.0002844379  | -0.0148232591 | -1.6552530552 |
| Ca           | 0.0007525269  | -0.0139577661 | 1.6576861869  |
| H            | -1.2760794530 | 0.5625980675  | -0.0352822218 |
| H            | 1.2348453015  | 0.5818584394  | -0.0614694888 |
| 4            |               |               |               |
| QSD Point 24 |               |               |               |
| Ca           | 0.0001922804  | -0.0128768915 | -1.6745588166 |
| Ca           | 0.0006071838  | -0.0120220220 | 1.6773747073  |
| H            | -1.2889365965 | 0.4887098484  | -0.0444092302 |
| H            | 1.2571464838  | 0.5013773132  | -0.0675626115 |
| 4            |               |               |               |
| QSD Point 25 |               |               |               |
| Ca           | 0.0002733191  | -0.0116986659 | -1.6919594541 |
| Ca           | 0.0005234886  | -0.0102699173 | 1.6973622397  |
| H            | -1.3438687748 | 0.4314435526  | -0.0997582050 |
| H            | 1.3121842967  | 0.4421211600  | -0.1150796328 |

### 5.3 M2 → TS3 → M2'

|                                              |
|----------------------------------------------|
| 4                                            |
| QSD Point 1                                  |
| Ca -0.0000002105 -0.0184376293 -1.7107791619 |
| Ca 0.0000000801 -0.0155831403 1.8060911660   |
| H -0.0000001687 1.3304393608 -0.0384806579   |
| H 0.0000053517 0.0223717640 -3.7515317657    |
| 4                                            |
| QSD Point 2                                  |
| Ca -0.0000002127 -0.0184363879 -1.7107710544 |
| Ca 0.0000000810 -0.0155834870 1.8060833506   |
| H -0.0000001703 1.3304399989 -0.0384998674   |
| H 0.0000054098 0.0223355474 -3.7515241728    |
| 4                                            |
| QSD Point 3                                  |
| Ca -0.0000002000 -0.0183859837 -1.7107431108 |
| Ca 0.0000000760 -0.0156035300 1.8060560620   |
| H -0.0000001548 1.3305328245 -0.0385010078   |
| H 0.0000050828 0.0210354288 -3.7515490781    |
| 4                                            |
| QSD Point 4                                  |
| Ca -0.0000001736 -0.0184724342 -1.7109357069 |
| Ca 0.0000000661 -0.0155667330 1.8062584089   |
| H -0.0000001421 1.3303326305 -0.0387918924   |
| H 0.0000044146 0.0232100654 -3.7516459272    |
| 4                                            |
| QSD Point 5                                  |
| Ca -0.0000001221 -0.0183447003 -1.7140148006 |
| Ca 0.0000000464 -0.0155721177 1.8094418657   |
| H -0.0000000934 1.3282021573 -0.0399044964   |
| H 0.0000031068 0.0204754051 -3.7546832494    |
| 4                                            |
| QSD Point 6                                  |
| Ca -0.0000004104 -0.0185043658 -1.7030348119 |
| Ca 0.0000001560 -0.0157595709 1.7983073903   |
| H -0.0000002902 1.3446005306 -0.0440453396   |
| H 0.0000104052 0.0178799552 -3.7443993510    |
| 4                                            |
| QSD Point 7                                  |
| Ca -0.0000004697 -0.0184917434 -1.7049311420 |
| Ca 0.0000001823 -0.0152343196 1.7993519873   |
| H -0.0000005543 1.3005469504 -0.0090547784   |
| H 0.0000119850 0.0405453807 -3.7455213658    |
| 4                                            |
| QSD Point 8                                  |
| Ca 0.0000000000 -0.0179490541 -1.7263533128  |
| Ca 0.0000000000 -0.0159442160 1.8228375235   |
| H 0.0000000000 1.3524472842 -0.0696384015    |
| H 0.0000015827 -0.0047060842 -3.7669859640   |
| 4                                            |
| QSD Point 9                                  |
| Ca 0.0000000000 -0.0149294691 -1.7454972372  |
| Ca 0.0000000000 -0.0162429224 1.8416165605   |
| H 0.0000000000 1.2922155186 -0.0357327522    |
| H -0.0000024174 -0.0526680750 -3.7863821333  |
| 4                                            |
| QSD Point 10                                 |
| Ca 0.0000004093 -0.0126858576 -1.7647792349  |

|              |               |               |               |
|--------------|---------------|---------------|---------------|
| Ca           | -0.0000001331 | -0.0171260889 | 1.8620557544  |
| H            | -0.0000008529 | 1.3069437365  | -0.0644847215 |
| H            | -0.0000101283 | -0.1214933972 | -3.8036452304 |
| 4            |               |               |               |
| QSD Point 11 |               |               |               |
| Ca           | 0.0000005917  | -0.0092106657 | -1.7839982037 |
| Ca           | -0.0000001750 | -0.0179090971 | 1.8814903996  |
| H            | -0.0000021772 | 1.2781650660  | -0.0595087918 |
| H            | -0.0000143915 | -0.1997674476 | -3.8171973738 |
| 4            |               |               |               |
| QSD Point 12 |               |               |               |
| Ca           | 0.0000010421  | -0.0061082563 | -1.8040193627 |
| Ca           | -0.0000002767 | -0.0189693077 | 1.9024130422  |
| H            | -0.0000055572 | 1.2863119951  | -0.0853025072 |
| H            | -0.0000248779 | -0.2891209283 | -3.8272504990 |
| 4            |               |               |               |
| QSD Point 13 |               |               |               |
| Ca           | 0.0000020807  | -0.0019459284 | -1.8233770593 |
| Ca           | -0.0000004778 | -0.0198863442 | 1.9217323843  |
| H            | -0.0000151381 | 1.2544192299  | -0.0805640645 |
| H            | -0.0000485991 | -0.3862748122 | -3.8304638028 |
| 4            |               |               |               |
| QSD Point 14 |               |               |               |
| Ca           | 0.0000004859  | 0.0009836542  | -1.8427032347 |
| Ca           | -0.0000000980 | -0.0210520691 | 1.9420801089  |
| H            | -0.0000042881 | 1.2827935681  | -0.1232645946 |
| H            | -0.0000111384 | -0.4847876639 | -3.8283844306 |
| 4            |               |               |               |
| QSD Point 15 |               |               |               |
| Ca           | 0.0000005947  | 0.0061160808  | -1.8624085455 |
| Ca           | -0.0000000934 | -0.0218736043 | 1.9609265992  |
| H            | -0.0000066623 | 1.2242023576  | -0.1002452666 |
| H            | -0.0000132697 | -0.5976159116 | -3.8172533840 |
| 4            |               |               |               |
| QSD Point 16 |               |               |               |
| Ca           | 0.0000007007  | 0.0092941996  | -1.8828667911 |
| Ca           | -0.0000000905 | -0.0231758410 | 1.9823641420  |
| H            | -0.0000089388 | 1.2711562208  | -0.1620704354 |
| H            | -0.0000153238 | -0.7191628587 | -3.7943692571 |
| 4            |               |               |               |
| QSD Point 17 |               |               |               |
| Ca           | 0.0000008273  | 0.0160354169  | -1.9099060993 |
| Ca           | -0.0000000563 | -0.0242506318 | 2.0080139404  |
| H            | -0.0000132343 | 1.2196359947  | -0.1559442158 |
| H            | -0.0000174242 | -0.8929639592 | -3.7452426337 |
| 4            |               |               |               |
| QSD Point 18 |               |               |               |
| Ca           | 0.0000007882  | 0.0199086037  | -1.9369803855 |
| Ca           | -0.0000000297 | -0.0254659141 | 2.0355989376  |
| H            | -0.0000139322 | 1.2765893475  | -0.2336119085 |
| H            | -0.0000162293 | -1.0556069487 | -3.6878829875 |
| 4            |               |               |               |
| QSD Point 19 |               |               |               |
| Ca           | 0.0000009500  | 0.0184219459  | -1.9596515190 |
| Ca           | -0.0000000562 | -0.0264075739 | 2.0628323512  |
| H            | -0.0000159570 | 1.5059159152  | -0.4729041792 |
| H            | -0.0000195855 | -1.1883732341 | -3.6300064633 |
| 4            |               |               |               |
| QSD Point 20 |               |               |               |



|              |               |               |               |
|--------------|---------------|---------------|---------------|
| Ca           | 0.0000006642  | 0.0148454041  | -1.9785538672 |
| Ca           | -0.0000000559 | -0.0255582744 | 2.0880917265  |
| H            | -0.0000105584 | 1.7451980837  | -0.8014452095 |
| H            | -0.0000136276 | -1.3192085957 | -3.5542479882 |
| 4            |               |               |               |
| QSD Point 21 |               |               |               |
| Ca           | 0.0000028482  | 0.0116484364  | -1.9934144450 |
| Ca           | -0.0000002788 | -0.0232144029 | 2.1085237571  |
| H            | -0.0000445448 | 1.9053821076  | -1.1180859228 |
| H            | -0.0000576271 | -1.4454698757 | -3.4591520359 |
| 4            |               |               |               |
| QSD Point 22 |               |               |               |
| Ca           | -0.0000024013 | 0.0093889753  | -2.0043858875 |
| Ca           | 0.0000002498  | -0.0205152852 | 2.1234144883  |
| H            | 0.0000377468  | 1.9930257108  | -1.3710678348 |
| H            | 0.0000478074  | -1.5505961019 | -3.3620177856 |
| 4            |               |               |               |
| QSD Point 23 |               |               |               |
| Ca           | 0.0000089337  | 0.0077303944  | -2.0129071718 |
| Ca           | -0.0000009542 | -0.0178712301 | 2.1346794880  |
| H            | -0.0001421890 | 2.0408038837  | -1.5750589410 |
| H            | -0.0001751114 | -1.6375609359 | -3.2671285218 |
| 4            |               |               |               |
| QSD Point 24 |               |               |               |
| Ca           | 0.0000014415  | 0.0064163095  | -2.0197401561 |
| Ca           | -0.0000001557 | -0.0153536184 | 2.1434814176  |
| H            | -0.0000232804 | 2.0661447740  | -1.7458193808 |
| H            | -0.0000278460 | -1.7107591945 | -3.1746617605 |
| 4            |               |               |               |
| QSD Point 25 |               |               |               |
| Ca           | 0.0000024501  | 0.0052916077  | -2.0254082126 |
| Ca           | -0.0000002660 | -0.0129435876 | 2.1506132372  |
| H            | -0.0000401621 | 2.0776600866  | -1.8945617835 |
| H            | -0.0000466851 | -1.7733846771 | -3.0841248308 |
| 4            |               |               |               |
| QSD Point 26 |               |               |               |
| Ca           | 0.0000001644  | 0.0042656824  | -2.0302211324 |
| Ca           | -0.0000000179 | -0.0105750618 | 2.1565303885  |
| H            | -0.0000027351 | 2.0796931880  | -2.0299708442 |
| H            | -0.0000030910 | -1.8288053110 | -2.9926247310 |
| 4            |               |               |               |
| QSD Point 27 |               |               |               |
| Ca           | 0.0000046660  | 0.0032329843  | -2.0341512438 |
| Ca           | -0.0000005064 | -0.0080728474 | 2.1613011062  |
| H            | -0.0000788699 | 2.0737219801  | -2.1634509063 |
| H            | -0.0000865331 | -1.8812683467 | -2.8925707674 |
| 4            |               |               |               |
| QSD Point 28 |               |               |               |
| Ca           | 0.0001369209  | 0.0025912550  | -2.0361910052 |
| Ca           | -0.0000148435 | -0.0064892347 | 2.1637440881  |
| H            | -0.0023370820 | 2.0661552523  | -2.2440653780 |
| H            | -0.0025172401 | -1.9111549293 | -2.8279900655 |
| 4            |               |               |               |
| QSD Point 29 |               |               |               |
| Ca           | -0.0008317497 | 0.0022201326  | -2.0372406463 |
| Ca           | 0.0000901532  | -0.0055726989 | 2.1649995899  |
| H            | 0.0142750143  | 2.0604679868  | -2.2897879528 |
| H            | 0.0152140302  | -1.9271556311 | -2.7904533883 |
| 4            |               |               |               |

|              |               |               |               |
|--------------|---------------|---------------|---------------|
| QSD Point 30 |               |               |               |
| Ca           | 0.0003366292  | 0.0017056823  | -2.0382786360 |
| Ca           | -0.0000364570 | -0.0042852966 | 2.1662447732  |
| H            | -0.0058222730 | 2.0511944903  | -2.3521416965 |
| H            | -0.0061138561 | -1.9486180037 | -2.7363385504 |
| 4            |               |               |               |
| QSD Point 31 |               |               |               |
| Ca           | -0.0000642375 | 0.0014184144  | -2.0387955249 |
| Ca           | 0.0000069551  | -0.0035660543 | 2.1668596874  |
| H            | 0.0011157643  | 2.0452604101  | -2.3864687012 |
| H            | 0.0011620309  | -1.9598610741 | -2.7059094502 |
| 4            |               |               |               |
| QSD Point 32 |               |               |               |
| Ca           | 0.0000118811  | 0.0012007429  | -2.0391328221 |
| Ca           | -0.0000012862 | -0.0030202777 | 2.1672600692  |
| H            | -0.0002070275 | 2.0404118988  | -2.4122392442 |
| H            | -0.0002142718 | -1.9680594214 | -2.6826474173 |
| 4            |               |               |               |
| QSD Point 33 |               |               |               |
| Ca           | -0.0000022461 | 0.0010227084  | -2.0393699468 |
| Ca           | 0.0000002431  | -0.0025733384 | 2.1675411326  |
| H            | 0.0000392409  | 2.0362272186  | -2.4331622472 |
| H            | 0.0000404075  | -1.9745675452 | -2.6634716082 |
| 4            |               |               |               |
| QSD Point 34 |               |               |               |
| Ca           | 0.0000003934  | 0.0008744907  | -2.0395405696 |
| Ca           | -0.0000000426 | -0.0022009585 | 2.1677431091  |
| H            | -0.0000068885 | 2.0325947761  | -2.4504745672 |
| H            | -0.0000070632 | -1.9798487528 | -2.6474060448 |
| 4            |               |               |               |
| QSD Point 35 |               |               |               |
| Ca           | 0.0000000000  | 0.0007492986  | -2.0396784146 |
| Ca           | 0.0000000000  | -0.0018863088 | 2.1679055333  |
| H            | 0.0000016888  | 2.0294167274  | -2.4650542566 |
| H            | 0.0000016888  | -1.9842043460 | -2.6338037272 |
| 4            |               |               |               |
| QSD Point 36 |               |               |               |
| Ca           | 0.0000000000  | 0.0006417239  | -2.0399072453 |
| Ca           | 0.0000000000  | -0.0016167727 | 2.1681663639  |
| H            | 0.0000000000  | 2.0265838022  | -2.4777464676 |
| H            | 0.0000000000  | -1.9878116961 | -2.6223839688 |
| 4            |               |               |               |
| QSD Point 37 |               |               |               |
| Ca           | 0.0000000000  | 0.0002395261  | -2.0400035154 |
| Ca           | 0.0000000000  | -0.0006035992 | 2.1682886173  |
| H            | 0.0000000000  | 2.0155207917  | -2.5235941334 |
| H            | 0.0000000000  | -2.0010436868 | -2.5775695129 |
| 4            |               |               |               |
| QSD Point 38 |               |               |               |
| Ca           | 0.0000000000  | -0.0002396178 | -2.0400035162 |
| Ca           | 0.0000000000  | 0.0006038217  | 2.1682886164  |
| H            | 0.0000000000  | 2.0010409553  | -2.5775794079 |
| H            | 0.0000000000  | -2.0155232563 | -2.5235841713 |
| 4            |               |               |               |
| QSD Point 39 |               |               |               |
| Ca           | 0.0000000000  | -0.0006418614 | -2.0399072080 |
| Ca           | 0.0000000000  | 0.0016171153  | 2.1681663193  |
| H            | 0.0000000000  | 1.9878070835  | -2.6223991554 |
| H            | 0.0000000000  | -2.0265873446 | -2.4777309896 |

|              |               |               |               |
|--------------|---------------|---------------|---------------|
| 4            |               |               |               |
| QSD Point 40 |               |               |               |
| Ca           | 0.0000000000  | -0.0007494535 | -2.0396782851 |
| Ca           | 0.0000000000  | 0.0018866908  | 2.1679053786  |
| H            | -0.0000002879 | 1.9841991940  | -2.6338203160 |
| H            | -0.0000002879 | -2.0294206054 | -2.4650366694 |
| 4            |               |               |               |
| QSD Point 41 |               |               |               |
| Ca           | -0.0000007873 | -0.0008746728 | -2.0395403385 |
| Ca           | 0.0000000852  | 0.0022014046  | 2.1677428407  |
| H            | 0.0000141339  | 1.9798426061  | -2.6474252648 |
| H            | 0.0000137842  | -2.0325991310 | -2.4504538648 |
| 4            |               |               |               |
| QSD Point 42 |               |               |               |
| Ca           | 0.0000039659  | -0.0010228961 | -2.0393697076 |
| Ca           | -0.0000004293 | 0.0025738073  | 2.1675408631  |
| H            | -0.0000713455 | 1.9745607192  | -2.6634920313 |
| H            | -0.0000692854 | -2.0362315708 | -2.4331406178 |
| 4            |               |               |               |
| QSD Point 43 |               |               |               |
| Ca           | -0.0000213243 | -0.0012010591 | -2.0391324004 |
| Ca           | 0.0000023084  | 0.0030210638  | 2.1672595549  |
| H            | 0.0003845793  | 1.9680479119  | -2.6826808429 |
| H            | 0.0003715737  | -2.0404190748 | -2.4122021390 |
| 4            |               |               |               |
| QSD Point 44 |               |               |               |
| Ca           | 0.0001149830  | -0.0014204381 | -2.0387929649 |
| Ca           | -0.0000124494 | 0.0035711481  | 2.1668566046  |
| H            | -0.0020800555 | 1.9597818523  | -2.7061282995 |
| H            | -0.0019971207 | -2.0453032697 | -2.3862290621 |
| 4            |               |               |               |
| QSD Point 45 |               |               |               |
| Ca           | -0.0005395515 | -0.0017399692 | -2.0382257790 |
| Ca           | 0.0000584376  | 0.0043715855  | 2.1661809034  |
| H            | 0.0098040007  | 1.9472100259  | -2.7400152289 |
| H            | 0.0093271425  | -2.0518543319 | -2.3480271011 |
| 4            |               |               |               |
| QSD Point 46 |               |               |               |
| Ca           | 0.0004895029  | -0.0022062718 | -2.0372801858 |
| Ca           | -0.0000530546 | 0.0055372516  | 2.1650454400  |
| H            | -0.0089520295 | 1.9278147396  | -2.7889640970 |
| H            | -0.0084030207 | -2.0602687253 | -2.2915281799 |
| 4            |               |               |               |
| QSD Point 47 |               |               |               |
| Ca           | -0.0000228877 | -0.0025526474 | -2.0362437177 |
| Ca           | 0.0000024810  | 0.0063924212  | 2.1638134281  |
| H            | 0.0004205587  | 1.9129310265  | -2.8238935759 |
| H            | 0.0003909020  | -2.0656168322 | -2.2488230479 |
| 4            |               |               |               |
| QSD Point 48 |               |               |               |
| Ca           | 0.0000065925  | -0.0032327069 | -2.0340987474 |
| Ca           | -0.0000007153 | 0.0080677281  | 2.1612386978  |
| H            | -0.0001222590 | 1.8814647721  | -2.8920989102 |
| H            | -0.0001114434 | -2.0737258670 | -2.1635286192 |
| 4            |               |               |               |
| QSD Point 49 |               |               |               |
| Ca           | 0.0000005906  | -0.0042758349 | -2.0302075142 |
| Ca           | -0.0000000642 | 0.0106017381  | 2.1565110912  |
| H            | -0.0000111065 | 1.8281641419  | -2.9937962420 |

|              |               |               |               |
|--------------|---------------|---------------|---------------|
| H            | -0.0000098244 | -2.0797090748 | -2.0285735106 |
| 4            |               |               |               |
| QSD Point 50 |               |               |               |
| Ca           | -0.0000022808 | -0.0053001522 | -2.0253656922 |
| Ca           | 0.0000002476  | 0.0129636714  | 2.1505613810  |
| H            | 0.0000434642  | 1.7728709521  | -3.0849245098 |
| H            | 0.0000373819  | -2.0776052096 | -1.8933908765 |
| 4            |               |               |               |
| QSD Point 51 |               |               |               |
| Ca           | 0.0000009046  | -0.0064250332 | -2.0196946553 |
| Ca           | -0.0000000977 | 0.0153713027  | 2.1434235736  |
| H            | -0.0000174771 | 1.7102772831  | -3.1753125436 |
| H            | -0.0000146086 | -2.0660191756 | -1.7446777780 |
| 4            |               |               |               |
| QSD Point 52 |               |               |               |
| Ca           | -0.0000077084 | -0.0077438927 | -2.0128302908 |
| Ca           | 0.0000008231  | 0.0178936343  | 2.1345807131  |
| H            | 0.0001511124  | 1.6369060632  | -3.2678838510 |
| H            | 0.0001226737  | -2.0405031439 | -1.5734330186 |
| 4            |               |               |               |
| QSD Point 53 |               |               |               |
| Ca           | 0.0000019982  | -0.0094086954 | -2.0042827791 |
| Ca           | -0.0000002078 | 0.0205432128  | 2.1232776031  |
| H            | -0.0000397881 | 1.5496091110  | -3.3630104557 |
| H            | -0.0000314065 | -1.9923650874 | -1.3687320537 |
| 4            |               |               |               |
| QSD Point 54 |               |               |               |
| Ca           | -0.0000022727 | -0.0116748973 | -1.9932865289 |
| Ca           | 0.0000002223  | 0.0232404620  | 2.1083494836  |
| H            | 0.0000459890  | 1.4443291757  | -3.4601089645 |
| H            | 0.0000355440  | -1.9042254307 | -1.1152856285 |
| 4            |               |               |               |
| QSD Point 55 |               |               |               |
| Ca           | -0.0000004421 | -0.0148820415 | -1.9783791066 |
| Ca           | 0.0000000371  | 0.0255763619  | 2.0878533159  |
| H            | 0.0000090719  | 1.3178747738  | -3.5551323868 |
| H            | 0.0000070305  | -1.7431266355 | -0.7980298137 |
| 4            |               |               |               |
| QSD Point 56 |               |               |               |
| Ca           | -0.0000006750 | -0.0184519031 | -1.9594475596 |
| Ca           | 0.0000000398  | 0.0264059033  | 2.0625708724  |
| H            | 0.0000139163  | 1.1871441556  | -3.6306085856 |
| H            | 0.0000113458  | -1.5034291802 | -0.4700148424 |
| 4            |               |               |               |
| QSD Point 57 |               |               |               |
| Ca           | -0.0000005475 | -0.0199010938 | -1.9367399684 |
| Ca           | 0.0000000206  | 0.0254529424  | 2.0353323847  |
| H            | 0.0000112742  | 1.0542543766  | -3.6884015492 |
| H            | 0.0000096782  | -1.2750195924 | -0.2320540781 |
| 4            |               |               |               |
| QSD Point 58 |               |               |               |
| Ca           | -0.0000005897 | -0.0159688894 | -1.9095746568 |
| Ca           | 0.0000000405  | 0.0242377676  | 2.0076906376  |
| H            | 0.0000124246  | 0.8909673590  | -3.7458548471 |
| H            | 0.0000094143  | -1.2197732787 | -0.1556556693 |
| 4            |               |               |               |
| QSD Point 59 |               |               |               |
| Ca           | -0.0000004878 | -0.0092237739 | -1.8825389205 |
| Ca           | 0.0000000633  | 0.0231592848  | 1.9820402636  |

|              |               |               |               |
|--------------|---------------|---------------|---------------|
| H            | 0.0000106728  | 0.7171222367  | -3.7948544237 |
| H            | 0.0000062072  | -1.2712576749 | -0.1617440171 |
| 4            |               |               |               |
| QSD Point 60 |               |               |               |
| Ca           | -0.0000004230 | -0.0060461404 | -1.8620363639 |
| Ca           | 0.0000000667  | 0.0218528070  | 1.9605475273  |
| H            | 0.0000094437  | 0.5954951975  | -3.8175408699 |
| H            | 0.0000047248  | -1.2240357807 | -0.0996837960 |
| 4            |               |               |               |
| QSD Point 61 |               |               |               |
| Ca           | -0.0000004556 | -0.0009138857 | -1.8423841149 |
| Ca           | 0.0000000921  | 0.0210364204  | 1.9417632712  |
| H            | 0.0000104479  | 0.4830636773  | -3.8284817992 |
| H            | 0.0000040060  | -1.2832216134 | -0.1232579725 |
| 4            |               |               |               |
| QSD Point 62 |               |               |               |
| Ca           | -0.0000003438 | 0.0020013212  | -1.8230947453 |
| Ca           | 0.0000000791  | 0.0198718710  | 1.9214463903  |
| H            | 0.0000080319  | 0.3848440993  | -3.8304557163 |
| H            | 0.0000024918  | -1.2546156603 | -0.0804258160 |
| 4            |               |               |               |
| QSD Point 63 |               |               |               |
| Ca           | -0.0000002506 | 0.0061528908  | -1.8037500350 |
| Ca           | 0.0000000666  | 0.0189551126  | 1.9021337399  |
| H            | 0.0000059835  | 0.2878724438  | -3.8271517174 |
| H            | 0.0000013305  | -1.2862739127 | -0.0850046516 |
| 4            |               |               |               |
| QSD Point 64 |               |               |               |
| Ca           | -0.0000001094 | 0.0092619577  | -1.7837180256 |
| Ca           | 0.0000000324  | 0.0178972397  | 1.8812065414  |
| H            | 0.0000026616  | 0.1985793392  | -3.8170255408 |
| H            | 0.0000003999  | -1.2785450431 | -0.0595342847 |
| 4            |               |               |               |
| QSD Point 65 |               |               |               |
| Ca           | 0.0000000000  | 0.0127255371  | -1.7644763302 |
| Ca           | 0.0000000000  | 0.0171120848  | 1.8617371727  |
| H            | 0.0000018986  | 0.1203484323  | -3.8033982146 |
| H            | 0.0000000000  | -1.3068197347 | -0.0641083491 |
| 4            |               |               |               |
| QSD Point 66 |               |               |               |
| Ca           | 0.0000000000  | 0.0149776126  | -1.7451716825 |
| Ca           | 0.0000000000  | 0.0162346097  | 1.8412881287  |
| H            | 0.0000007498  | 0.0516996135  | -3.7860642589 |
| H            | 0.0000000000  | -1.2928309020 | -0.0359362221 |

## 5.4 M4 → TS4 → M5

6

QSD Point 1

|    |               |               |               |
|----|---------------|---------------|---------------|
| Ca | 0.0000350396  | 0.0000057121  | 1.7478044669  |
| Ca | -0.0000181352 | -0.0000184404 | -1.7477984144 |
| H  | 0.0000629135  | 1.3652736772  | 0.0000010867  |
| H  | 0.0000629609  | -1.3652687541 | -0.0001615058 |
| H  | 0.0000870947  | 0.0005006019  | -3.8011861738 |
| H  | -0.0008851596 | 0.0000006057  | 3.8011059204  |

6

QSD Point 2

|    |               |               |               |
|----|---------------|---------------|---------------|
| Ca | 0.0000550651  | 0.0000093699  | 1.7479517730  |
| Ca | -0.0000197399 | -0.0000188498 | -1.7479528881 |
| H  | 0.0001825379  | 1.3659708649  | -0.0001743509 |
| H  | 0.0001828928  | -1.3655209308 | 0.0000306387  |
| H  | -0.0002011596 | 0.0001846871  | -3.8010660029 |
| H  | -0.0015689539 | -0.0002576600 | 3.8012540562  |

6

QSD Point 3

|    |               |               |               |
|----|---------------|---------------|---------------|
| Ca | -0.0005135058 | 0.0000474947  | 1.7483615323  |
| Ca | 0.0002063204  | -0.0001620068 | -1.7483597407 |
| H  | -0.0018767589 | 1.3658214341  | -0.0002376115 |
| H  | -0.0018772740 | -1.3650616465 | -0.0011037415 |
| H  | 0.0014032807  | 0.0039685883  | -3.8004212693 |
| H  | 0.0145657569  | -0.0001748832 | 3.8016913819  |

6

QSD Point 4

|    |               |               |               |
|----|---------------|---------------|---------------|
| Ca | 0.0013912254  | 0.0002619405  | 1.7481505052  |
| Ca | -0.0006851915 | -0.0008597161 | -1.7481620044 |
| H  | 0.0007802564  | 1.3634877707  | 0.0016846804  |
| H  | 0.0008799130  | -1.3626611173 | -0.0054378923 |
| H  | 0.0041180832  | 0.0230160204  | -3.7974563685 |
| H  | -0.0338531774 | -0.0000725640 | 3.8016668370  |

6

QSD Point 5

|    |               |               |               |
|----|---------------|---------------|---------------|
| Ca | -0.0005316558 | -0.0017421059 | 1.7515622264  |
| Ca | 0.0003549167  | 0.0049153782  | -1.7505031520 |
| H  | 0.0064682596  | 1.3460411577  | -0.0272361859 |
| H  | 0.0073039633  | -1.3863989748 | -0.0160423214 |
| H  | -0.0115240620 | -0.1057228531 | -3.8041580817 |
| H  | 0.0047797405  | 0.0198978094  | 3.8053232651  |

6

QSD Point 6

|    |               |               |               |
|----|---------------|---------------|---------------|
| Ca | -0.0068651123 | 0.0028436745  | 1.7464752133  |
| Ca | 0.0028530361  | -0.0074834951 | -1.7481022667 |
| H  | -0.0116796544 | 1.4127704147  | 0.0320570066  |
| H  | -0.0199915125 | -1.3160671458 | 0.0436490953  |
| H  | 0.0063641299  | 0.1367814670  | -3.8007891336 |
| H  | 0.1848443289  | -0.0489856488 | 3.7897816268  |

6

QSD Point 7

|    |               |               |               |
|----|---------------|---------------|---------------|
| Ca | -0.0116260298 | -0.0001986068 | 1.7473262606  |
| Ca | 0.0049158059  | 0.0004288340  | -1.7465982561 |
| H  | -0.0289420722 | 1.3664792417  | -0.0044897559 |
| H  | -0.0287565390 | -1.3638837562 | 0.0012009363  |
| H  | 0.0099843319  | -0.0126363154 | -3.7995474718 |
| H  | 0.3145414451  | 0.0008860134  | 3.7738877260  |

6

|              |               |               |               |
|--------------|---------------|---------------|---------------|
| QSD Point 8  |               |               |               |
| Ca           | -0.0167480808 | -0.0002241304 | 1.7472390196  |
| Ca           | 0.0070968166  | 0.0005104886  | -1.7458621007 |
| H            | -0.0418632784 | 1.3698789178  | -0.0054944527 |
| H            | -0.0423812895 | -1.3621063481 | 0.0050731663  |
| H            | 0.0127224516  | -0.0181883251 | -3.7982734505 |
| H            | 0.4552976076  | -0.0009710703 | 3.7439425594  |
| 6            |               |               |               |
| QSD Point 9  |               |               |               |
| Ca           | -0.0219167415 | -0.0002892788 | 1.7463363946  |
| Ca           | 0.0092307801  | 0.0005889226  | -1.7438956369 |
| H            | -0.0575233605 | 1.3700822862  | -0.0064993136 |
| H            | -0.0580574606 | -1.3605363398 | 0.0060289598  |
| H            | 0.0175944240  | -0.0210024311 | -3.7962622125 |
| H            | 0.6024344160  | -0.0004586335 | 3.6996776137  |
| 6            |               |               |               |
| QSD Point 10 |               |               |               |
| Ca           | -0.0265417194 | -0.0004296925 | 1.7456194444  |
| Ca           | 0.0111395103  | 0.0009884842  | -1.7419809011 |
| H            | -0.0708019646 | 1.3722055455  | -0.0084042123 |
| H            | -0.0717582084 | -1.3601111067 | 0.0097071606  |
| H            | 0.0188327197  | -0.0333533358 | -3.7938694668 |
| H            | 0.7361850821  | -0.0009610490 | 3.6478824926  |
| 6            |               |               |               |
| QSD Point 11 |               |               |               |
| Ca           | -0.0309854648 | -0.0005449049 | 1.7442265067  |
| Ca           | 0.0128697339  | 0.0011214000  | -1.7389881154 |
| H            | -0.0880383154 | 1.3720991145  | -0.0088962017 |
| H            | -0.0878565295 | -1.3597379791 | 0.0103971633  |
| H            | 0.0232147000  | -0.0363550272 | -3.7917472970 |
| H            | 0.8730389891  | 0.0010699841  | 3.5819455213  |
| 6            |               |               |               |
| QSD Point 12 |               |               |               |
| Ca           | -0.0349576837 | -0.0005083145 | 1.7445451216  |
| Ca           | 0.0143958990  | 0.0010143008  | -1.7377681641 |
| H            | -0.1057504703 | 1.3766843307  | -0.0066610028 |
| H            | -0.1069899188 | -1.3606791070 | 0.0145782228  |
| H            | 0.0265875961  | -0.0357972513 | -3.7854554551 |
| H            | 1.0037771848  | -0.0003281494 | 3.5080574537  |
| 6            |               |               |               |
| QSD Point 13 |               |               |               |
| Ca           | -0.0383981840 | 0.0006659368  | 1.7417290261  |
| Ca           | 0.0155558563  | -0.0022842091 | -1.7334132560 |
| H            | -0.1250248162 | 1.3896627548  | 0.0104026933  |
| H            | -0.1430416733 | -1.3450465142 | 0.0238408784  |
| H            | 0.0390855566  | 0.0352101917  | -3.7801363688 |
| H            | 1.1372894543  | -0.0154770129 | 3.4152222563  |
| 6            |               |               |               |
| QSD Point 14 |               |               |               |
| Ca           | -0.0417450355 | -0.0044196003 | 1.7393765851  |
| Ca           | 0.0170101259  | 0.0096224322  | -1.7265604032 |
| H            | -0.1854552851 | 1.3325301225  | -0.0445398606 |
| H            | -0.1075392809 | -1.4051778315 | -0.0141009345 |
| H            | 0.0277327391  | -0.2045783097 | -3.7741221946 |
| H            | 1.2488274897  | 0.0703391993  | 3.3231368515  |
| 6            |               |               |               |
| QSD Point 15 |               |               |               |
| Ca           | -0.0439454229 | -0.0006416288 | 1.7353763484  |
| Ca           | 0.0178758560  | 0.0011055946  | -1.7224184946 |

|              |               |               |               |
|--------------|---------------|---------------|---------------|
| H            | -0.1691839839 | 1.3864844719  | -0.0021747937 |
| H            | -0.1761114246 | -1.3546274145 | 0.0316959252  |
| H            | 0.0279358250  | -0.0469157175 | -3.7703183966 |
| H            | 1.3539969249  | -0.0033906033 | 3.2255376449  |
| 6            |               |               |               |
| QSD Point 16 |               |               |               |
| Ca           | -0.0460915284 | -0.0016030665 | 1.7316923097  |
| Ca           | 0.0186080884  | 0.0029356344  | -1.7157275637 |
| H            | -0.2089206873 | 1.3790173352  | -0.0071798392 |
| H            | -0.1914925331 | -1.3655142524 | 0.0300029578  |
| H            | 0.0274238523  | -0.0827126485 | -3.7621920745 |
| H            | 1.4658483414  | 0.0162209734  | 3.1045424590  |
| 6            |               |               |               |
| QSD Point 17 |               |               |               |
| Ca           | -0.0476312669 | -0.0018488921 | 1.7267950526  |
| Ca           | 0.0190315118  | 0.0032806825  | -1.7078091957 |
| H            | -0.2444854352 | 1.3803398470  | -0.0044102000 |
| H            | -0.2195271297 | -1.3675620846 | 0.0362764047  |
| H            | 0.0267093919  | -0.0911180476 | -3.7528352577 |
| H            | 1.5745516015  | 0.0214061815  | 2.9660102826  |
| 6            |               |               |               |
| QSD Point 18 |               |               |               |
| Ca           | -0.0484398529 | -0.0025633145 | 1.7210322935  |
| Ca           | 0.0190636323  | 0.0038954142  | -1.6986543312 |
| H            | -0.2948696060 | 1.3773571041  | -0.0014133294 |
| H            | -0.2393670302 | -1.3729498609 | 0.0415632538  |
| H            | 0.0267559192  | -0.1005265211 | -3.7423145275 |
| H            | 1.6756047342  | 0.0431493036  | 2.8123212311  |
| 6            |               |               |               |
| QSD Point 19 |               |               |               |
| Ca           | -0.0484980993 | -0.0032651548 | 1.7149321506  |
| Ca           | 0.0187406723  | 0.0044276346  | -1.6892217934 |
| H            | -0.3473691733 | 1.3725596220  | 0.0023301767  |
| H            | -0.2546557024 | -1.3786392343 | 0.0473828609  |
| H            | 0.0265507197  | -0.1077911549 | -3.7319097429 |
| H            | 1.7587565689  | 0.0676456060  | 2.6598430741  |
| 6            |               |               |               |
| QSD Point 20 |               |               |               |
| Ca           | -0.0472038383 | -0.0090571800 | 1.7084763206  |
| Ca           | 0.0174665264  | 0.0067730561  | -1.6793381468 |
| H            | -0.5425143125 | 1.3147455863  | 0.0065990700  |
| H            | -0.1213772414 | -1.4059234821 | 0.0516174235  |
| H            | 0.0388016792  | -0.1085105416 | -3.7216033627 |
| H            | 1.8075724223  | 0.2905149584  | 2.5047286127  |
| 6            |               |               |               |
| QSD Point 21 |               |               |               |
| Ca           | -0.0468856314 | 0.0034459474  | 1.7019384511  |
| Ca           | 0.0178527372  | 0.0021509441  | -1.6695524159 |
| H            | -0.2151620374 | 1.4138196552  | 0.0121026579  |
| H            | -0.5137310784 | -1.3227950241 | 0.0578417243  |
| H            | 0.0069961493  | -0.1165794801 | -3.7115267831 |
| H            | 1.8763688614  | -0.1970014655 | 2.3537752972  |
| 6            |               |               |               |
| QSD Point 22 |               |               |               |
| Ca           | -0.0451003503 | 0.0003109350  | 1.6968662157  |
| Ca           | 0.0162185371  | 0.0017050809  | -1.6611992511 |
| H            | -0.3608438379 | 1.3958155794  | 0.0271227379  |
| H            | -0.4493971808 | -1.3543148292 | 0.0590432582  |
| H            | 0.0257504579  | -0.0679944706 | -3.7011228108 |



|              |               |               |               |
|--------------|---------------|---------------|---------------|
| H            | 1.9329548278  | -0.0536716832 | 2.1966859412  |
| 6            |               |               |               |
| QSD Point 23 |               |               |               |
| Ca           | -0.0438017399 | 0.0015994061  | 1.6886633549  |
| Ca           | 0.0165080898  | 0.0087075396  | -1.6477736148 |
| H            | -0.2996216036 | 1.3753794460  | -0.0108551000 |
| H            | -0.5640842575 | -1.3588208359 | 0.0313303542  |
| H            | -0.0094001648 | -0.2427849207 | -3.6902199719 |
| H            | 1.9584181438  | -0.1836218784 | 2.0437939834  |
| 6            |               |               |               |
| QSD Point 24 |               |               |               |
| Ca           | -0.0409083057 | -0.0010572812 | 1.6803888243  |
| Ca           | 0.0136521053  | 0.0004707855  | -1.6386027919 |
| H            | -0.4745316183 | 1.3875692859  | 0.0489461860  |
| H            | -0.4542244567 | -1.3564131247 | 0.0813799613  |
| H            | 0.0226752378  | -0.0284380335 | -3.6848519898 |
| H            | 1.9899037962  | 0.0206034494  | 1.8929346977  |
| 6            |               |               |               |
| QSD Point 25 |               |               |               |
| Ca           | -0.0383117575 | -0.0003383570 | 1.6735047147  |
| Ca           | 0.0122906719  | 0.0024134311  | -1.6275474507 |
| H            | -0.4702903385 | 1.3789397493  | 0.0426844744  |
| H            | -0.5204646493 | -1.3602614009 | 0.0669698307  |
| H            | 0.0223683097  | -0.0714569219 | -3.6754484804 |
| H            | 2.0030961935  | -0.0297352382 | 1.7383370408  |
| 6            |               |               |               |
| QSD Point 26 |               |               |               |
| Ca           | -0.0324465842 | -0.0000811000 | 1.6593355301  |
| Ca           | 0.0089664126  | 0.0002286500  | -1.6071717342 |
| H            | -0.5511038957 | 1.3656034709  | 0.0655681886  |
| H            | -0.5506177345 | -1.3656673535 | 0.0677105990  |
| H            | 0.0332513905  | -0.0061261271 | -3.6605075654 |
| H            | 2.0021421637  | 0.0003227897  | 1.4529734287  |
| 6            |               |               |               |
| QSD Point 27 |               |               |               |
| Ca           | -0.0306796822 | 0.0001577911  | 1.6553883767  |
| Ca           | 0.0080573491  | -0.0004413940 | -1.6015228749 |
| H            | -0.5654532210 | 1.3643586350  | 0.0719637337  |
| H            | -0.5664944947 | -1.3641812770 | 0.0678382090  |
| H            | 0.0358697936  | 0.0118063329  | -3.6561651802 |
| H            | 1.9956385198  | -0.0007064260 | 1.3744407897  |
| 6            |               |               |               |
| QSD Point 28 |               |               |               |
| Ca           | -0.0239850332 | 0.0004826258  | 1.6411338567  |
| Ca           | 0.0049927026  | -0.0006028238 | -1.5806405394 |
| H            | -0.6488786110 | 1.3312918966  | 0.0846612461  |
| H            | -0.5903848899 | -1.3851216710 | 0.0564581233  |
| H            | 0.0450141826  | 0.0354879155  | -3.6397852555 |
| H            | 1.9494655107  | 0.0231214423  | 1.0931931808  |
| 6            |               |               |               |
| QSD Point 29 |               |               |               |
| Ca           | -0.0194812386 | 0.0033464828  | 1.6304790452  |
| Ca           | 0.0020211390  | -0.0141190082 | -1.5701992098 |
| H            | -0.5994432351 | 1.4245437705  | 0.1611680313  |
| H            | -0.6920488482 | -1.2866335510 | 0.1115080031  |
| H            | 0.0714866275  | 0.3194921167  | -3.6214051616 |
| H            | 1.9142935981  | -0.0290407100 | 0.9517453761  |
| 6            |               |               |               |
| QSD Point 30 |               |               |               |

|              |               |               |               |
|--------------|---------------|---------------|---------------|
| Ca           | -0.0156118342 | 0.0022819333  | 1.6249624077  |
| Ca           | 0.0015031822  | -0.0063143269 | -1.5585672024 |
| H            | -0.6933818141 | 1.3424737980  | 0.1271796675  |
| H            | -0.6638310187 | -1.3644109344 | 0.0651162014  |
| H            | 0.0613928191  | 0.1735314093  | -3.6162286538 |
| H            | 1.8568402839  | 0.0087509244  | 0.7837758043  |
| 6            |               |               |               |
| QSD Point 31 |               |               |               |
| Ca           | -0.0095008779 | 0.0033714670  | 1.6099200801  |
| Ca           | -0.0005851196 | -0.0092599598 | -1.5391412554 |
| H            | -0.7348259799 | 1.3388262788  | 0.1533075683  |
| H            | -0.6988001431 | -1.3630974982 | 0.0670761932  |
| H            | 0.0725011436  | 0.2503776072  | -3.5982509141 |
| H            | 1.7621873264  | 0.0080452386  | 0.5633987375  |
| 6            |               |               |               |
| QSD Point 32 |               |               |               |
| Ca           | -0.0054115485 | 0.0035930946  | 1.5986465832  |
| Ca           | -0.0012795325 | -0.0101622170 | -1.5251601149 |
| H            | -0.7790490370 | 1.3293246566  | 0.1692032899  |
| H            | -0.7054444957 | -1.3701255592 | 0.0792557821  |
| H            | 0.0672101047  | 0.2716862980  | -3.5834500921 |
| H            | 1.6833493905  | 0.0303309755  | 0.4128551286  |
| 6            |               |               |               |
| QSD Point 33 |               |               |               |
| Ca           | -0.0033264091 | 0.0025581661  | 1.5874819107  |
| Ca           | 0.0001643302  | -0.0088098007 | -1.5125103861 |
| H            | -0.9864794659 | 1.2012282581  | 0.1750003047  |
| H            | -0.5087518034 | -1.4591622769 | 0.1060254602  |
| H            | 0.0149459568  | 0.2328362786  | -3.5734463920 |
| H            | 1.6060230753  | 0.2736894371  | 0.3112325516  |
| 6            |               |               |               |
| QSD Point 34 |               |               |               |
| Ca           | -0.0024184316 | 0.0010723376  | 1.5766372688  |
| Ca           | 0.0012029171  | -0.0053129468 | -1.5016470343 |
| H            | -1.1495589199 | 1.0738598468  | 0.1732856103  |
| H            | -0.3303979814 | -1.5161036359 | 0.1438591485  |
| H            | -0.0167010832 | 0.1343939872  | -3.5648677401 |
| H            | 1.5449920337  | 0.4764745398  | 0.2657909211  |
| 6            |               |               |               |
| QSD Point 35 |               |               |               |
| Ca           | 0.0000891379  | 0.0011520380  | 1.5677888588  |
| Ca           | -0.0021376111 | -0.0016327355 | -1.4927317783 |
| H            | 0.7208904553  | 1.4284707960  | 0.1765567418  |
| H            | -1.5734197518 | -0.0970604112 | 0.1732130883  |
| H            | 0.0515867156  | 0.0296849257  | -3.5568260246 |
| H            | 0.8823986248  | -1.3419807239 | 0.2224660543  |
| 6            |               |               |               |
| QSD Point 36 |               |               |               |
| Ca           | 0.0009338927  | 0.0000645118  | 1.5673523392  |
| Ca           | -0.0020243812 | 0.0024757624  | -1.4941211032 |
| H            | 1.4355428121  | -0.7618251614 | 0.2006354023  |
| H            | -0.0620279305 | 1.5777062350  | 0.2132620932  |
| H            | 0.0387666651  | -0.0450819590 | -3.5562889570 |
| H            | -1.3689190645 | -0.8718112662 | 0.2304046950  |

## 5.5 M5 → TS5 → M6

6

QSD Point 1

|    |               |               |               |
|----|---------------|---------------|---------------|
| Ca | -1.1855190556 | 0.1376994346  | 1.5752605205  |
| Ca | 0.6851409317  | -0.0781657234 | -0.8447986828 |
| H  | 0.4736374673  | 1.3120226496  | 1.0256349219  |
| H  | 0.0694002991  | -1.4366073873 | 0.9583562584  |
| H  | -1.6022621898 | 0.2494518106  | -0.4863056115 |
| H  | 1.9438336172  | -0.2232981756 | -2.4777624967 |

6

QSD Point 2

|    |               |               |               |
|----|---------------|---------------|---------------|
| Ca | -1.1852342456 | 0.1376430387  | 1.5757551722  |
| Ca | 0.6847251812  | -0.0780907917 | -0.8454457683 |
| H  | 0.4733594531  | 1.3118797608  | 1.0253305800  |
| H  | 0.0691688899  | -1.4363701199 | 0.9580628811  |
| H  | -1.6026500769 | 0.2494897300  | -0.4856485315 |
| H  | 1.9448618681  | -0.2234490094 | -2.4776694237 |

6

QSD Point 3

|    |               |               |               |
|----|---------------|---------------|---------------|
| Ca | -1.1848294985 | 0.1375705815  | 1.5762521923  |
| Ca | 0.6842086679  | -0.0779990491 | -0.8461643411 |
| H  | 0.4731904180  | 1.3118010752  | 1.0247781636  |
| H  | 0.0690288991  | -1.4362172235 | 0.9575178906  |
| H  | -1.6032860903 | 0.2495629193  | -0.4848797102 |
| H  | 1.9459186738  | -0.2236156949 | -2.4771192855 |

6

QSD Point 4

|    |               |               |               |
|----|---------------|---------------|---------------|
| Ca | -1.1843678828 | 0.1374904599  | 1.5768413248  |
| Ca | 0.6836596102  | -0.0778973027 | -0.8470765379 |
| H  | 0.4731267446  | 1.3117992404  | 1.0239571811  |
| H  | 0.0689739135  | -1.4361602494 | 0.9566999968  |
| H  | -1.6042188970 | 0.2496767280  | -0.4839371670 |
| H  | 1.9470575814  | -0.2238062677 | -2.4760998881 |

6

QSD Point 5

|    |               |               |               |
|----|---------------|---------------|---------------|
| Ca | -1.1842867112 | 0.1374744346  | 1.5772845593  |
| Ca | 0.6836271244  | -0.0778742532 | -0.8478077764 |
| H  | 0.4732465386  | 1.3119337508  | 1.0233158478  |
| H  | 0.0690633979  | -1.4363042511 | 0.9560531715  |
| H  | -1.6049849910 | 0.2497769527  | -0.4833121482 |
| H  | 1.9475657112  | -0.2239040252 | -2.4751487444 |

6

QSD Point 6

|    |               |               |               |
|----|---------------|---------------|---------------|
| Ca | -1.1849476000 | 0.1375828718  | 1.5772337606  |
| Ca | 0.6845361239  | -0.0780052881 | -0.8478002436 |
| H  | 0.4735129706  | 1.3121737559  | 1.0234958590  |
| H  | 0.0692660013  | -1.4366380410 | 0.9562190914  |
| H  | -1.6048600077 | 0.2497720321  | -0.4836231271 |
| H  | 1.9467235818  | -0.2237827223 | -2.4751404306 |

6

QSD Point 7

|    |               |               |               |
|----|---------------|---------------|---------------|
| Ca | -1.1858879532 | 0.1377369527  | 1.5768338214  |
| Ca | 0.6857663383  | -0.0781977803 | -0.8471972393 |
| H  | 0.4737328758  | 1.3123534704  | 1.0242625410  |
| H  | 0.0694319701  | -1.4369221261 | 0.9569733969  |
| H  | -1.6040946771 | 0.2496849189  | -0.4844984091 |
| H  | 1.9452825160  | -0.2235528271 | -2.4759892011 |

6

|              |               |               |               |
|--------------|---------------|---------------|---------------|
| QSD Point 8  |               |               |               |
| Ca           | -1.1869927074 | 0.1379174621  | 1.5762407197  |
| Ca           | 0.6871917340  | -0.0784286122 | -0.8462081746 |
| H            | 0.4738964474  | 1.3124646603  | 1.0253809407  |
| H            | 0.0695584904  | -1.4371366607 | 0.9580812579  |
| H            | -1.6029864022 | 0.2495536565  | -0.4856735176 |
| H            | 1.9435635077  | -0.2232678974 | -2.4774363164 |
| 6            |               |               |               |
| QSD Point 9  |               |               |               |
| Ca           | -1.1887668184 | 0.1382000475  | 1.5754093418  |
| Ca           | 0.6895034501  | -0.0788120002 | -0.8442999481 |
| H            | 0.4741158706  | 1.3124587185  | 1.0270254623  |
| H            | 0.0697673754  | -1.4372766735 | 0.9597178426  |
| H            | -1.6018653988 | 0.2494297755  | -0.4872460028 |
| H            | 1.9414765911  | -0.2228972593 | -2.4802217861 |
| 6            |               |               |               |
| QSD Point 10 |               |               |               |
| Ca           | -1.1910203503 | 0.1385152630  | 1.5757205343  |
| Ca           | 0.6926366724  | -0.0793541191 | -0.8411510051 |
| H            | 0.4746879591  | 1.3118135145  | 1.0270244226  |
| H            | 0.0704987977  | -1.4368048649 | 0.9597301224  |
| H            | -1.6058600883 | 0.2499983442  | -0.4865363216 |
| H            | 1.9432880793  | -0.2230655291 | -2.4844028429 |
| 6            |               |               |               |
| QSD Point 11 |               |               |               |
| Ca           | -1.1898317523 | 0.1382575117  | 1.5785788332  |
| Ca           | 0.6913671620  | -0.0791722548 | -0.8415557427 |
| H            | 0.4751652923  | 1.3109409738  | 1.0223571633  |
| H            | 0.0712196726  | -1.4358513857 | 0.9550989823  |
| H            | -1.6155062322 | 0.2512759430  | -0.4810567105 |
| H            | 1.9518169276  | -0.2243481796 | -2.4830376158 |
| 6            |               |               |               |
| QSD Point 12 |               |               |               |
| Ca           | -1.1839560479 | 0.1372459472  | 1.5841318373  |
| Ca           | 0.6839291555  | -0.0779614100 | -0.8473053930 |
| H            | 0.4754061933  | 1.3101972718  | 1.0125334832  |
| H            | 0.0716985955  | -1.4347046771 | 0.9453255232  |
| H            | -1.6297148681 | 0.2531011358  | -0.4706885698 |
| H            | 1.9668680416  | -0.2267756592 | -2.4736119711 |
| 6            |               |               |               |
| QSD Point 13 |               |               |               |
| Ca           | -1.1720435826 | 0.1352669674  | 1.5931098880  |
| Ca           | 0.6684283671  | -0.0754034389 | -0.8600797911 |
| H            | 0.4753972525  | 1.3097589111  | 0.9962126606  |
| H            | 0.0718803034  | -1.4334700228 | 0.9290669566  |
| H            | -1.6494655830 | 0.2555893590  | -0.4542575492 |
| H            | 1.9900343124  | -0.2306391673 | -2.4536672552 |
| 6            |               |               |               |
| QSD Point 14 |               |               |               |
| Ca           | -1.1591246988 | 0.1331547637  | 1.6018287213  |
| Ca           | 0.6512975565  | -0.0725608037 | -0.8745246806 |
| H            | 0.4752371962  | 1.3099041943  | 0.9802267027  |
| H            | 0.0717539713  | -1.4327846572 | 0.9131245142  |
| H            | -1.6667713967 | 0.2577404267  | -0.4386195923 |
| H            | 2.0118384415  | -0.2343513153 | -2.4316507556 |
| 6            |               |               |               |
| QSD Point 15 |               |               |               |
| Ca           | -1.1454420287 | 0.1309465372  | 1.6102529494  |
| Ca           | 0.6327720691  | -0.0694743067 | -0.8903665024 |

|              |               |               |               |
|--------------|---------------|---------------|---------------|
| H            | 0.4750590735  | 1.3107256395  | 0.9647274413  |
| H            | 0.0714206099  | -1.4327841513 | 0.8976443764  |
| H            | -1.6819899468 | 0.2596087809  | -0.4238311157 |
| H            | 2.0324112929  | -0.2379198911 | -2.4080422392 |
| 6            |               |               |               |
| QSD Point 16 |               |               |               |
| Ca           | -1.1312083616 | 0.1286739770  | 1.6183860230  |
| Ca           | 0.6130619900  | -0.0661811136 | -0.9073436400 |
| H            | 0.4749644590  | 1.3122931287  | 0.9498153013  |
| H            | 0.0709581043  | -1.4335704402 | 0.8827222802  |
| H            | -1.6955377776 | 0.2612557312  | -0.4098719616 |
| H            | 2.0519926558  | -0.2413686746 | -2.3833230932 |
| 6            |               |               |               |
| QSD Point 17 |               |               |               |
| Ca           | -1.1165922085 | 0.1263603415  | 1.6262688243  |
| Ca           | 0.5922963638  | -0.0627042681 | -0.9252537078 |
| H            | 0.4750261609  | 1.3146981338  | 0.9355861872  |
| H            | 0.0704101252  | -1.4352562321 | 0.8684480576  |
| H            | -1.7078166620 | 0.2627394974  | -0.3966973832 |
| H            | 2.0709072905  | -0.2447348641 | -2.3579670685 |
| 6            |               |               |               |
| QSD Point 18 |               |               |               |
| Ca           | -1.1017504390 | 0.1240277526  | 1.6339164960  |
| Ca           | 0.5706275853  | -0.0590720945 | -0.9438731451 |
| H            | 0.4753168488  | 1.3180223267  | 0.9220903499  |
| H            | 0.0698226341  | -1.4379426881 | 0.8548677808  |
| H            | -1.7192644351 | 0.2641228159  | -0.3842166321 |
| H            | 2.0894788758  | -0.2480555041 | -2.3323999399 |
| 6            |               |               |               |
| QSD Point 19 |               |               |               |
| Ca           | -1.0869388573 | 0.1217164120  | 1.6411008317  |
| Ca           | 0.5487219212  | -0.0553995520 | -0.9625858749 |
| H            | 0.4760315539  | 1.3220229392  | 0.9089448754  |
| H            | 0.0694530522  | -1.4414309713 | 0.8416093442  |
| H            | -1.7308582776 | 0.2655388221  | -0.3719817649 |
| H            | 2.1078216775  | -0.2513450415 | -2.3067025019 |
| 6            |               |               |               |
| QSD Point 20 |               |               |               |
| Ca           | -1.0724412305 | 0.1194700676  | 1.6475452655  |
| Ca           | 0.5275042324  | -0.0518447733 | -0.9806133549 |
| H            | 0.4773698131  | 1.3261607460  | 0.8954923144  |
| H            | 0.0696479867  | -1.4452227688 | 0.8280395898  |
| H            | -1.7437632301 | 0.2671427869  | -0.3593561229 |
| H            | 2.1259134983  | -0.2546034499 | -2.2807227822 |
| 6            |               |               |               |
| QSD Point 21 |               |               |               |
| Ca           | -1.0620053970 | 0.1178630954  | 1.6517026100  |
| Ca           | 0.5127282420  | -0.0493717785 | -0.9931355472 |
| H            | 0.4788844031  | 1.3288681525  | 0.8847872223  |
| H            | 0.0704013969  | -1.4478028274 | 0.8172643633  |
| H            | -1.7549248986 | 0.2685504967  | -0.3492695082 |
| H            | 2.1391473235  | -0.2570045302 | -2.2609642305 |
| 6            |               |               |               |
| QSD Point 22 |               |               |               |
| Ca           | -1.0570401814 | 0.1171029042  | 1.6534233347  |
| Ca           | 0.5060740731  | -0.0482593885 | -0.9987881350 |
| H            | 0.4799110516  | 1.3298159824  | 0.8789615476  |
| H            | 0.0711545309  | -1.4487552208 | 0.8114212736  |
| H            | -1.7614238079 | 0.2693787929  | -0.3437918654 |

|              |               |               |               |
|--------------|---------------|---------------|---------------|
| H            | 2.145554036   | -0.2581804617 | -2.2508412458 |
| 6            |               |               |               |
| QSD Point 23 |               |               |               |
| Ca           | -1.0455892294 | 0.1156113307  | 1.6558294427  |
| Ca           | 0.4950460496  | -0.0458118927 | -1.0079488768 |
| H            | 0.4791926156  | 1.3315641566  | 0.8632232407  |
| H            | 0.0699076385  | -1.4487790149 | 0.7951132019  |
| H            | -1.7723084374 | 0.2713771415  | -0.3318367480 |
| H            | 2.1586087870  | -0.2602387529 | -2.2242684769 |
| 6            |               |               |               |
| QSD Point 24 |               |               |               |
| Ca           | -1.0335588327 | 0.1139198247  | 1.6579954878  |
| Ca           | 0.4837785338  | -0.0435148131 | -1.0172514846 |
| H            | 0.4785180673  | 1.3333782990  | 0.8472940416  |
| H            | 0.0687081811  | -1.4491312777 | 0.7787173807  |
| H            | -1.7830418971 | 0.2731236778  | -0.3196902452 |
| H            | 2.1708360318  | -0.2623613940 | -2.1971059170 |
| 6            |               |               |               |
| QSD Point 25 |               |               |               |
| Ca           | -1.0210570336 | 0.1121157203  | 1.6599541854  |
| Ca           | 0.4722829530  | -0.0413057216 | -1.0267546687 |
| H            | 0.4778689440  | 1.3353896224  | 0.8314300663  |
| H            | 0.0675020952  | -1.4498224186 | 0.7624880127  |
| H            | -1.7933209889 | 0.2746665439  | -0.3076594108 |
| H            | 2.1822211215  | -0.2644747639 | -2.1695986378 |
| 6            |               |               |               |
| QSD Point 26 |               |               |               |
| Ca           | -1.0081470082 | 0.1102313293  | 1.6617125522  |
| Ca           | 0.4605562913  | -0.0391394775 | -1.0364611984 |
| H            | 0.4772393708  | 1.3376211673  | 0.8156528274  |
| H            | 0.0662698818  | -1.4508162061 | 0.7464150434  |
| H            | -1.8029642978 | 0.2760309406  | -0.2958053775 |
| H            | 2.1927257551  | -0.2665352352 | -2.1417252939 |
| 6            |               |               |               |
| QSD Point 27 |               |               |               |
| Ca           | -0.9948160536 | 0.1082754239  | 1.6632650996  |
| Ca           | 0.4485883365  | -0.0369929379 | -1.0463631805 |
| H            | 0.4766106524  | 1.3400771547  | 0.7999654840  |
| H            | 0.0649886845  | -1.4520864567 | 0.7304842995  |
| H            | -1.8118687453 | 0.2772299455  | -0.2841732603 |
| H            | 2.2023104440  | -0.2685176099 | -2.1134431939 |
| 6            |               |               |               |
| QSD Point 28 |               |               |               |
| Ca           | -0.9810690309 | 0.1062541657  | 1.6646104373  |
| Ca           | 0.4363849541  | -0.0348492700 | -1.0564414336 |
| H            | 0.4759753978  | 1.3427566245  | 0.7843599476  |
| H            | 0.0636480338  | -1.4536118245 | 0.7146701842  |
| H            | -1.8199779384 | 0.2782758343  | -0.2727825853 |
| H            | 2.2109520266  | -0.2704043398 | -2.0847233226 |
| 6            |               |               |               |
| QSD Point 29 |               |               |               |
| Ca           | -0.9668995391 | 0.1041698583  | 1.6657435855  |
| Ca           | 0.4239601564  | -0.0326980746 | -1.0666747117 |
| H            | 0.4753248003  | 1.3456610424  | 0.7688357839  |
| H            | 0.0622363436  | -1.4553791928 | 0.6989587656  |
| H            | -1.8272644720 | 0.2791789882  | -0.2616533564 |
| H            | 2.2186338451  | -0.2721831955 | -2.0555515185 |
| 6            |               |               |               |
| QSD Point 30 |               |               |               |

|              |               |               |               |
|--------------|---------------|---------------|---------------|
| Ca           | -0.9523103789 | 0.1020248559  | 1.6666612962  |
| Ca           | 0.4113360619  | -0.0305322235 | -1.0770383089 |
| H            | 0.4746542109  | 1.3487933235  | 0.7533930592  |
| H            | 0.0607459433  | -1.4573803700 | 0.6833381201  |
| H            | -1.8337207335 | 0.2799493484  | -0.2507978674 |
| H            | 2.2253493899  | -0.2738455071 | -2.0259277934 |
| 6            |               |               |               |
| QSD Point 31 |               |               |               |
| Ca           | -0.9373002746 | 0.0998202633  | 1.6673577704  |
| Ca           | 0.3985391068  | -0.0283476482 | -1.0875078034 |
| H            | 0.4739579879  | 1.3521589444  | 0.7380352813  |
| H            | 0.0591678562  | -1.4596117115 | 0.6678020428  |
| H            | -1.8393516115 | 0.2805957284  | -0.2402267773 |
| H            | 2.2310963466  | -0.2753851322 | -1.9958592676 |
| 6            |               |               |               |
| QSD Point 32 |               |               |               |
| Ca           | -0.9218722020 | 0.0975573190  | 1.6678282050  |
| Ca           | 0.3855987756  | -0.0261422017 | -1.0980582915 |
| H            | 0.4732318691  | 1.3557646795  | 0.7227664712  |
| H            | 0.0574943673  | -1.4620725819 | 0.6523463943  |
| H            | -1.8441711966 | 0.2811263862  | -0.2299466426 |
| H            | 2.2358788088  | -0.2767980116 | -1.9653606972 |
| 6            |               |               |               |
| QSD Point 33 |               |               |               |
| Ca           | -0.9060264317 | 0.0952366383  | 1.6680661865  |
| Ca           | 0.3725457284  | -0.0239155326 | -1.1086662127 |
| H            | 0.4724704811  | 1.3596189095  | 0.7075918541  |
| H            | 0.0557165029  | -1.4647648688 | 0.6369698133  |
| H            | -1.8481990080 | 0.2815486483  | -0.2199621280 |
| H            | 2.2397035963  | -0.2780815803 | -1.9344493622 |
| 6            |               |               |               |
| QSD Point 34 |               |               |               |
| Ca           | -0.8897651917 | 0.0928589147  | 1.6680661403  |
| Ca           | 0.3594108652  | -0.0216683205 | -1.1193088476 |
| H            | 0.4716688171  | 1.3637307934  | 0.6925166648  |
| H            | 0.0538256794  | -1.4676923053 | 0.6216722458  |
| H            | -1.8514586451 | 0.2818692712  | -0.2102753915 |
| H            | 2.2425817740  | -0.2792346195 | -1.9031461097 |
| 6            |               |               |               |
| QSD Point 35 |               |               |               |
| Ca           | -0.8730881208 | 0.0904243598  | 1.6678211898  |
| Ca           | 0.3462243610  | -0.0194023024 | -1.1299650645 |
| H            | 0.4708207655  | 1.3681103991  | 0.6775460902  |
| H            | 0.0518121860  | -1.4708599835 | 0.6064547743  |
| H            | -1.8539755452 | 0.2820941921  | -0.2008869534 |
| H            | 2.2445258661  | -0.2802568277 | -1.8714713907 |
| 6            |               |               |               |
| QSD Point 36 |               |               |               |
| Ca           | -0.8559955530 | 0.0879332006  | 1.6673250053  |
| Ca           | 0.3330155123  | -0.0171198696 | -1.1406153136 |
| H            | 0.4699198995  | 1.3727680452  | 0.6626857252  |
| H            | 0.0496661206  | -1.4742738481 | 0.5913198229  |
| H            | -1.8557763507 | 0.2822287371  | -0.1917960437 |
| H            | 2.2455511474  | -0.2811487961 | -1.8394475037 |
| 6            |               |               |               |
| QSD Point 37 |               |               |               |
| Ca           | -0.8384860067 | 0.0853853895  | 1.6665707337  |
| Ca           | 0.3198120629  | -0.0148239987 | -1.1512418278 |
| H            | 0.4689587484  | 1.3777143152  | 0.6479411565  |

|              |               |               |               |
|--------------|---------------|---------------|---------------|
| H            | 0.0473767472  | -1.4779405139 | 0.5762707176  |
| H            | -1.8568880496 | 0.2822776471  | -0.1830009626 |
| H            | 2.2456743866  | -0.2819118151 | -1.8070961583 |
| 6            |               |               |               |
| QSD Point 38 |               |               |               |
| Ca           | -0.8205570202 | 0.0827806948  | 1.6655515786  |
| Ca           | 0.3066400932  | -0.0125180122 | -1.1618281548 |
| H            | 0.4679293060  | 1.3829597380  | 0.6333177435  |
| H            | 0.0449328838  | -1.4818668156 | 0.5613112671  |
| H            | -1.8573377504 | 0.2822451335  | -0.1744993739 |
| H            | 2.2449137714  | -0.2825476974 | -1.7744385837 |
| 6            |               |               |               |
| QSD Point 39 |               |               |               |
| Ca           | -0.8022032669 | 0.0801184865  | 1.6642600063  |
| Ca           | 0.2935243950  | -0.0102055714 | -1.1723589687 |
| H            | 0.4668222779  | 1.3885146063  | 0.6188209542  |
| H            | 0.0423223904  | -1.4860595165 | 0.5464460193  |
| H            | -1.8571525610 | 0.2821350730  | -0.1662891013 |
| H            | 2.2432878716  | -0.2830586413 | -1.7414947756 |
| 6            |               |               |               |
| QSD Point 40 |               |               |               |
| Ca           | -0.7834195557 | 0.0773981371  | 1.6626891643  |
| Ca           | 0.2804882787  | -0.0078905086 | -1.1828197860 |
| H            | 0.4656280169  | 1.3943887416  | 0.6044564337  |
| H            | 0.0395330056  | -1.4905251198 | 0.5316801025  |
| H            | -1.8563593247 | 0.2819510274  | -0.1583679717 |
| H            | 2.2408168801  | -0.2834472565 | -1.7082852740 |
| 6            |               |               |               |
| QSD Point 41 |               |               |               |
| Ca           | -0.7641987087 | 0.0746187632  | 1.6608309564  |
| Ca           | 0.2675532864  | -0.0055767475 | -1.1931973822 |
| H            | 0.4643359757  | 1.4005919292  | 0.5902292046  |
| H            | 0.0365517021  | -1.4952701621 | 0.5170185046  |
| H            | -1.8549838495 | 0.2816961428  | -0.1507329532 |
| H            | 2.2375212022  | -0.2837164039 | -1.6748281623 |
| 6            |               |               |               |
| QSD Point 42 |               |               |               |
| Ca           | -0.7445324213 | 0.0717793577  | 1.6586766741  |
| Ca           | 0.2547393341  | -0.0032684110 | -1.2034797866 |
| H            | 0.4629346695  | 1.4071332324  | 0.5761449932  |
| H            | 0.0333648808  | -1.5003005984 | 0.5024673549  |
| H            | -1.8530513362 | 0.2813732030  | -0.1433811834 |
| H            | 2.2334224321  | -0.2838693352 | -1.6411412927 |
| 6            |               |               |               |
| QSD Point 43 |               |               |               |
| Ca           | -0.7244107470 | 0.0688787024  | 1.6562168682  |
| Ca           | 0.2420645514  | -0.0009696147 | -1.2136561195 |
| H            | 0.4614119167  | 1.4140208526  | 0.5622098305  |
| H            | 0.0299586071  | -1.5056216891 | 0.4880335100  |
| H            | -1.8505869012 | 0.2809848441  | -0.1363100973 |
| H            | 2.2285431160  | -0.2839095790 | -1.6072413918 |
| 6            |               |               |               |
| QSD Point 44 |               |               |               |
| Ca           | -0.7038210552 | 0.0659152425  | 1.6534404733  |
| Ca           | 0.2295452622  | 0.0013155166  | -1.2237163035 |
| H            | 0.4597548289  | 1.4212619799  | 0.5484300274  |
| H            | 0.0263186416  | -1.5112377695 | 0.4737244316  |
| H            | -1.8476158190 | 0.2805335789  | -0.1295176457 |
| H            | 2.2229059622  | -0.2838408646 | -1.5731431151 |



|              |               |               |               |
|--------------|---------------|---------------|---------------|
| 6            |               |               |               |
| QSD Point 45 |               |               |               |
| Ca           | -0.6827490862 | 0.0628872322  | 1.6503351104  |
| Ca           | 0.2171961945  | 0.0035829699  | -1.2336509251 |
| H            | 0.4579504074  | 1.4288623126  | 0.5348125522  |
| H            | 0.0224309792  | -1.5171518913 | 0.4595485416  |
| H            | -1.8441641825 | 0.2800218563  | -0.1230025022 |
| H            | 2.2165342330  | -0.2836670788 | -1.5388599970 |
| 6            |               |               |               |
| QSD Point 46 |               |               |               |
| Ca           | -0.6611786870 | 0.0597926225  | 1.6468866703  |
| Ca           | 0.2050303216  | 0.0058285474  | -1.2434510634 |
| H            | 0.4559849958  | 1.4368257978  | 0.5213649127  |
| H            | 0.0182823569  | -1.5233658700 | 0.4455151612  |
| H            | -1.8402588475 | 0.2794528712  | -0.1167639808 |
| H            | 2.2094516931  | -0.2833923866 | -1.5044041954 |
| 6            |               |               |               |
| QSD Point 47 |               |               |               |
| Ca           | -0.6390918769 | 0.0566294573  | 1.6430788411  |
| Ca           | 0.1930585263  | 0.0080486783  | -1.2531082766 |
| H            | 0.4538466122  | 1.4451539759  | 0.5080950660  |
| H            | 0.0138603488  | -1.5298792180 | 0.4316341305  |
| H            | -1.8359287044 | 0.2788287877  | -0.1108021728 |
| H            | 2.2016817849  | -0.2830208226 | -1.4697853023 |
| 6            |               |               |               |
| QSD Point 48 |               |               |               |
| Ca           | -0.6164694125 | 0.0533953586  | 1.6388932581  |
| Ca           | 0.1812899106  | 0.0102396445  | -1.2626142348 |
| H            | 0.4515231495  | 1.4538459336  | 0.4950113554  |
| H            | 0.0091543266  | -1.5366896614 | 0.4179160957  |
| H            | -1.8312040661 | 0.2781530222  | -0.1051177478 |
| H            | 2.1932482148  | -0.2825566565 | -1.4350113885 |
| 6            |               |               |               |
| QSD Point 49 |               |               |               |
| Ca           | -0.5932905640 | 0.0500879371  | 1.6343089072  |
| Ca           | 0.1697315125  | 0.0123980695  | -1.2719605450 |
| H            | 0.4490038492  | 1.4628975067  | 0.4821223161  |
| H            | 0.0041555897  | -1.5437922297 | 0.4043720603  |
| H            | -1.8261175033 | 0.2774290189  | -0.0997119404 |
| H            | 2.1841742172  | -0.2820041475 | -1.4000879213 |
| 6            |               |               |               |
| QSD Point 50 |               |               |               |
| Ca           | -0.5695345481 | 0.0467048521  | 1.6293027095  |
| Ca           | 0.1583884022  | 0.0145208462  | -1.2811384256 |
| H            | 0.4462795680  | 1.4723007903  | 0.4694365742  |
| H            | -0.0011419086 | -1.5511789121 | 0.3910133343  |
| H            | -1.8207038940 | 0.2766606341  | -0.0945863971 |
| H            | 2.1744829868  | -0.2813675656 | -1.3650186821 |
| 6            |               |               |               |
| QSD Point 51 |               |               |               |
| Ca           | -0.5451800432 | 0.0432437675  | 1.6238488524  |
| Ca           | 0.1472635531  | 0.0166051702  | -1.2901383824 |
| H            | 0.4433429819  | 1.4820438452  | 0.4569623940  |
| H            | -0.0067413160 | -1.5588383764 | 0.3778510668  |
| H            | -1.8150004530 | 0.2758520906  | -0.0897429644 |
| H            | 2.1641969028  | -0.2806511105 | -1.3298047137 |
| 6            |               |               |               |
| QSD Point 52 |               |               |               |
| Ca           | -0.5202072429 | 0.0397026076  | 1.6179198173  |

|              |               |               |               |
|--------------|---------------|---------------|---------------|
| Ca           | 0.1363581328  | 0.0186485413  | -1.2989497775 |
| H            | 0.4401889467  | 1.4921100958  | 0.4447075775  |
| H            | -0.0126423172 | -1.5667554912 | 0.3648961632  |
| H            | -1.8090467139 | 0.2750080494  | -0.0851833987 |
| H            | 2.1533383742  | -0.2798589797 | -1.2944458889 |
| 6            |               |               |               |
| QSD Point 53 |               |               |               |
| Ca           | -0.4945976516 | 0.0360795720  | 1.6114859363  |
| Ca           | 0.1256714015  | 0.0206487515  | -1.3075604723 |
| H            | 0.4368146536  | 1.5024782487  | 0.4326788629  |
| H            | -0.0188410063 | -1.5749112231 | 0.3521586123  |
| H            | -1.8028841091 | 0.2741335057  | -0.0809089859 |
| H            | 2.1419290428  | -0.2789952609 | -1.2589399375 |
| 6            |               |               |               |
| QSD Point 54 |               |               |               |
| Ca           | -0.4683364604 | 0.0323734161  | 1.6045166637  |
| Ca           | 0.1152010114  | 0.0226039355  | -1.3159564984 |
| H            | 0.4332201719  | 1.5131218863  | 0.4208819043  |
| H            | -0.0253292654 | -1.5832823544 | 0.3396474982  |
| H            | -1.7965558350 | 0.2732337852  | -0.0769203089 |
| H            | 2.1299905798  | -0.2780639863 | -1.2232842667 |
| 6            |               |               |               |
| QSD Point 55 |               |               |               |
| Ca           | -0.4414126622 | 0.0285834957  | 1.5969804114  |
| Ca           | 0.1049430579  | 0.0245125095  | -1.3241217719 |
| H            | 0.4294084472  | 1.5240095108  | 0.4093205748  |
| H            | -0.0320947513 | -1.5918415018 | 0.3273702494  |
| H            | -1.7901060405 | 0.2723144349  | -0.0732166557 |
| H            | 2.1175439326  | -0.2770690363 | -1.1874752335 |
| 6            |               |               |               |
| QSD Point 56 |               |               |               |
| Ca           | -0.4138226032 | 0.0247102221  | 1.5888466260  |
| Ca           | 0.0948926322  | 0.0263731559  | -1.3320379995 |
| H            | 0.4253860563  | 1.5351042315  | 0.3979972954  |
| H            | -0.0391201107 | -1.6005569843 | 0.3153329380  |
| H            | -1.7835795846 | 0.2713811931  | -0.0697957758 |
| H            | 2.1046105650  | -0.2760142239 | -1.1515111892 |
| 6            |               |               |               |
| QSD Point 57 |               |               |               |
| Ca           | -0.3855702782 | 0.0207550953  | 1.5800860614  |
| Ca           | 0.0850439224  | 0.0281848223  | -1.3396847652 |
| H            | 0.4211633260  | 1.5463641028  | 0.3869122395  |
| H            | -0.0463829866 | -1.6093931347 | 0.3035394747  |
| H            | -1.7770211655 | 0.2704398372  | -0.0666531706 |
| H            | 2.0912116706  | -0.2749031785 | -1.1153917733 |
| 6            |               |               |               |
| QSD Point 58 |               |               |               |
| Ca           | -0.3566713159 | 0.0167212286  | 1.5706734750  |
| Ca           | 0.0753910616  | 0.0299465796  | -1.3470396211 |
| H            | 0.4167550979  | 1.5577417349  | 0.3760637559  |
| H            | -0.0538551555 | -1.6183101275 | 0.2919919626  |
| H            | -1.7704749738 | 0.2694961639  | -0.0637818407 |
| H            | 2.0773693531  | -0.2737394169 | -1.0791215537 |
| 6            |               |               |               |
| QSD Point 59 |               |               |               |
| Ca           | -0.3271557285 | 0.0126136666  | 1.5605903744  |
| Ca           | 0.0659287613  | 0.0316576811  | -1.3540786247 |
| H            | 0.4121811338  | 1.5691845286  | 0.3654482942  |
| H            | -0.0615022094 | -1.6272642989 | 0.2806906116  |

|              |               |               |               |
|--------------|---------------|---------------|---------------|
| H            | -1.7639840550 | 0.2685559033  | -0.0611719833 |
| H            | 2.0631074062  | -0.2725263997 | -1.0427123832 |
| 6            |               |               |               |
| QSD Point 60 |               |               |               |
| Ca           | -0.2970701344 | 0.0084396730  | 1.5498272616  |
| Ca           | 0.0566528154  | 0.0333174063  | -1.3607772846 |
| H            | 0.4074667061  | 1.5806348635  | 0.3550601163  |
| H            | -0.0692830873 | -1.6362084507 | 0.2696333717  |
| H            | -1.7575896111 | 0.2676245893  | -0.0588102938 |
| H            | 2.0484512719  | -0.2712674499 | -1.0061847400 |
| 6            |               |               |               |
| QSD Point 61 |               |               |               |
| Ca           | -0.2664831544 | 0.0042093646  | 1.5383891207  |
| Ca           | 0.0475616126  | 0.0349249434  | -1.3671112982 |
| H            | 0.4026431121  | 1.5920299479  | 0.3448921253  |
| H            | -0.0771495477 | -1.6450918549 | 0.2588167512  |
| H            | -1.7513307417 | 0.2667075376  | -0.0566801685 |
| H            | 2.0334306441  | -0.2699659761 | -0.9695739251 |
| 6            |               |               |               |
| QSD Point 62 |               |               |               |
| Ca           | -0.2354879112 | -0.0000640364 | 1.5262997564  |
| Ca           | 0.0386567741  | 0.0364793591  | -1.3730579369 |
| H            | 0.3977477788  | 1.6033024212  | 0.3349357088  |
| H            | -0.0850462318 | -1.6538608522 | 0.2482356140  |
| H            | -1.7452437335 | 0.2658097526  | -0.0547616177 |
| H            | 2.0180805844  | -0.2686255687 | -0.9329327455 |
| 6            |               |               |               |
| QSD Point 63 |               |               |               |
| Ca           | -0.2042046934 | -0.0043639455 | 1.5136066579  |
| Ca           | 0.0299441040  | 0.0379794654  | -1.3785974357 |
| H            | 0.3928241005  | 1.6143811935  | 0.3251809388  |
| H            | -0.0929110645 | -1.6624596204 | 0.2378833081  |
| H            | -1.7393614584 | 0.2649358493  | -0.0530314465 |
| H            | 2.0024431976  | -0.2672501446 | -0.8963351370 |
| 6            |               |               |               |
| QSD Point 64 |               |               |               |
| Ca           | -0.1727855055 | -0.0086699168 | 1.5003874659  |
| Ca           | 0.0214346959  | 0.0394234274  | -1.3837142147 |
| H            | 0.3879212105  | 1.6251918404  | 0.3156175105  |
| H            | -0.1006757198 | -1.6708307399 | 0.2277527112  |
| H            | -1.7337132041 | 0.2640902928  | -0.0514639203 |
| H            | 1.9865715968  | -0.2658440373 | -0.8598827022 |
| 6            |               |               |               |
| QSD Point 65 |               |               |               |
| Ca           | -0.1414123911 | -0.0129577583 | 1.4867528103  |
| Ca           | 0.0131448889  | 0.0408101963  | -1.3883979702 |
| H            | 0.3830922868  | 1.6356595465  | 0.3062347560  |
| H            | -0.1082670332 | -1.6789161369 | 0.2178354469  |
| H            | -1.7283241372 | 0.2632759329  | -0.0500317213 |
| H            | 1.9705308314  | -0.2644142621 | -0.8237048287 |
| 6            |               |               |               |
| QSD Point 66 |               |               |               |
| Ca           | -0.1102999951 | -0.0171997960 | 1.4728500960  |
| Ca           | 0.0050962243  | 0.0421368157  | -1.3926431534 |
| H            | 0.3783950517  | 1.6457082060  | 0.2970204649  |
| H            | -0.1156088936 | -1.6866593080 | 0.2081219312  |
| H            | -1.7232151280 | 0.2624968444  | -0.0487058426 |
| H            | 1.9544017819  | -0.2629663028 | -0.7879618246 |
| 6            |               |               |               |

|              |               |               |               |
|--------------|---------------|---------------|---------------|
| QSD Point 67 |               |               |               |
| Ca           | -0.0797010019 | -0.0213637103 | 1.4588685859  |
| Ca           | -0.0026845512 | 0.0434005535  | -1.3964529679 |
| H            | 0.3738879821  | 1.6552632756  | 0.2879750963  |
| H            | -0.1226239177 | -1.6940051881 | 0.1986148315  |
| H            | -1.7184055880 | 0.2617561053  | -0.0474644180 |
| H            | 1.9382946099  | -0.2615103581 | -0.7528649378 |
| 6            |               |               |               |
| QSD Point 68 |               |               |               |
| Ca           | -0.0498451407 | -0.0254203218 | 1.4449901479  |
| Ca           | -0.0101803657 | 0.0446026703  | -1.3998012208 |
| H            | 0.3696447636  | 1.6642400209  | 0.2789993879  |
| H            | -0.1292174697 | -1.7008849560 | 0.1892134706  |
| H            | -1.7139143221 | 0.2610573564  | -0.0462239605 |
| H            | 1.9222749118  | -0.2600514586 | -0.7185063163 |
| 6            |               |               |               |
| QSD Point 69 |               |               |               |
| Ca           | -0.0218896724 | -0.0292197779 | 1.4319118920  |
| Ca           | -0.0171593786 | 0.0457092451  | -1.4028065858 |
| H            | 0.3657639566  | 1.6724935566  | 0.2707468666  |
| H            | -0.1352579039 | -1.7072300790 | 0.1805789623  |
| H            | -1.7098186788 | 0.2604169706  | -0.0452620095 |
| H            | 1.9071139491  | -0.2586619613 | -0.6865029100 |
| 6            |               |               |               |
| QSD Point 70 |               |               |               |
| Ca           | 0.0214470274  | -0.0350895768 | 1.4113167397  |
| Ca           | -0.0279086937 | 0.0473996498  | -1.4064088561 |
| H            | 0.3601876058  | 1.6841929514  | 0.2559136218  |
| H            | -0.1438705616 | -1.7160123472 | 0.1652018615  |
| H            | -1.7040254998 | 0.2594824481  | -0.0423597694 |
| H            | 1.8829146696  | -0.2564473392 | -0.6350001794 |
| 6            |               |               |               |
| QSD Point 71 |               |               |               |
| Ca           | 0.0320870263  | -0.0365304296 | 1.4062596424  |
| Ca           | -0.0305477872 | 0.0478146288  | -1.4072910048 |
| H            | 0.3588192699  | 1.6870632782  | 0.2522666366  |
| H            | -0.1459837471 | -1.7181660597 | 0.1614215861  |
| H            | -1.7026043221 | 0.2592532200  | -0.0416435282 |
| H            | 1.8769720718  | -0.2559035125 | -0.6223505705 |
| 6            |               |               |               |
| QSD Point 72 |               |               |               |
| Ca           | 0.0753527324  | -0.0423904555 | 1.3856940004  |
| Ca           | -0.0412785024 | 0.0495017791  | -1.4108686173 |
| H            | 0.3532581847  | 1.6987239623  | 0.2374156572  |
| H            | -0.1545704651 | -1.7269146359 | 0.1460283963  |
| H            | -1.6968296448 | 0.2583209151  | -0.0387145639 |
| H            | 1.8528034276  | -0.2536920644 | -0.5708949209 |
| 6            |               |               |               |
| QSD Point 73 |               |               |               |
| Ca           | 0.1011809188  | -0.0458923561 | 1.3732954388  |
| Ca           | -0.0476733556 | 0.0504625175  | -1.4121854328 |
| H            | 0.3501205629  | 1.7048536957  | 0.2265259850  |
| H            | -0.1592629283 | -1.7313202080 | 0.1348826335  |
| H            | -1.6937269226 | 0.2577572418  | -0.0354278778 |
| H            | 1.8380662232  | -0.2523861385 | -0.5384280394 |
| 6            |               |               |               |
| QSD Point 74 |               |               |               |
| Ca           | 0.1276938817  | -0.0494847490 | 1.3606137245  |
| Ca           | -0.0542896091 | 0.0514398159  | -1.4132218756 |

|              |               |               |               |
|--------------|---------------|---------------|---------------|
| H            | 0.3468905456  | 1.7110048819  | 0.2143531729  |
| H            | -0.1640385109 | -1.7356556028 | 0.1224678272  |
| H            | -1.6904695974 | 0.2571435597  | -0.0312915303 |
| H            | 1.8228790657  | -0.2510633283 | -0.5042511431 |
| 6            |               |               |               |
| QSD Point 75 |               |               |               |
| Ca           | 0.1516847753  | -0.0527358707 | 1.3491836385  |
| Ca           | -0.0603558485 | 0.0522815618  | -1.4133878016 |
| H            | 0.3439283967  | 1.7160610009  | 0.2008871052  |
| H            | -0.1682259928 | -1.7389817001 | 0.1088543496  |
| H            | -1.6875165923 | 0.2565139744  | -0.0255905522 |
| H            | 1.8090810720  | -0.2499311566 | -0.4712574407 |
| 6            |               |               |               |
| QSD Point 76 |               |               |               |
| Ca           | 0.1723993354  | -0.0555422852 | 1.3393079317  |
| Ca           | -0.0656952442 | 0.0529629925  | -1.4126765007 |
| H            | 0.3411555243  | 1.7199759361  | 0.1860007626  |
| H            | -0.1718872677 | -1.7412246982 | 0.0939167869  |
| H            | -1.6847672482 | 0.2558433026  | -0.0178789070 |
| H            | 1.7972916923  | -0.2490659747 | -0.4399506177 |
| 6            |               |               |               |
| QSD Point 77 |               |               |               |
| Ca           | 0.1890136576  | -0.0577865139 | 1.3311637060  |
| Ca           | -0.0700576513 | 0.0534334851  | -1.4109696546 |
| H            | 0.3384578994  | 1.7225029709  | 0.1691090320  |
| H            | -0.1750542430 | -1.7420955356 | 0.0770973854  |
| H            | -1.6821692521 | 0.2550917298  | -0.0071841930 |
| H            | 1.7881677178  | -0.2485669029 | -0.4104516790 |
| 6            |               |               |               |
| QSD Point 78 |               |               |               |
| Ca           | 0.1998603896  | -0.0592323227 | 1.3251741616  |
| Ca           | -0.0729227934 | 0.0535820836  | -1.4080638807 |
| H            | 0.3357367008  | 1.7230926189  | 0.1495614223  |
| H            | -0.1776537977 | -1.7410333674 | 0.0578106076  |
| H            | -1.6797198800 | 0.2542047578  | 0.0078807752  |
| H            | 1.7828500211  | -0.2485965890 | -0.3835277923 |
| 6            |               |               |               |
| QSD Point 79 |               |               |               |
| Ca           | 0.2026248252  | -0.0595567766 | 1.3221317892  |
| Ca           | -0.0736850885 | 0.0532514564  | -1.4041426206 |
| H            | 0.3331401489  | 1.7212868120  | 0.1281656466  |
| H            | -0.1794079198 | -1.7377538258 | 0.0369751637  |
| H            | -1.6774687872 | 0.2531375289  | 0.0275996086  |
| H            | 1.7825947897  | -0.2493092706 | -0.3617715778 |
| 6            |               |               |               |
| QSD Point 80 |               |               |               |
| Ca           | 0.2057611967  | -0.0599233805 | 1.3186000221  |
| Ca           | -0.0749805996 | 0.0529286020  | -1.4021154041 |
| H            | 0.3308315633  | 1.7212357206  | 0.1091932250  |
| H            | -0.1814024342 | -1.7364870282 | 0.0186171891  |
| H            | -1.6741149410 | 0.2518792308  | 0.0457908751  |
| H            | 1.7812228144  | -0.2498837198 | -0.3409641381 |

## 5.6 M5 → TS6 → M5'

6

QSD Point 1

|    |               |               |               |
|----|---------------|---------------|---------------|
| Ca | 1.2141857380  | 0.0000000000  | -1.0668137357 |
| Ca | -0.5344164320 | -0.0000000000 | 1.4705829326  |
| H  | -0.2043602837 | 1.4084620205  | -0.3451862483 |
| H  | -0.2043602837 | -1.4084620205 | -0.3451862483 |
| H  | -2.0992376216 | 0.0000000000  | 2.8260968395  |
| H  | 1.7712931125  | -0.0000000000 | 0.9431455993  |

6

QSD Point 2

|    |               |               |               |
|----|---------------|---------------|---------------|
| Ca | 1.1849076225  | 0.0000000000  | -1.0774780447 |
| Ca | -0.5155177082 | -0.0000000000 | 1.4749234135  |
| H  | -0.1969936630 | 1.4057774765  | -0.3401976539 |
| H  | -0.1969936630 | -1.4057774765 | -0.3401976539 |
| H  | -2.1113153250 | 0.0000000000  | 2.8055977695  |
| H  | 1.7801815803  | -0.0000000000 | 0.9599907494  |

6

QSD Point 3

|    |               |               |               |
|----|---------------|---------------|---------------|
| Ca | 1.1813330804  | -0.0000000000 | -1.0759730818 |
| Ca | -0.5011211663 | 0.0000000000  | 1.4874071882  |
| H  | -0.1970258862 | 1.4069887194  | -0.3268251205 |
| H  | -0.1970258862 | -1.4069887194 | -0.3268251205 |
| H  | -2.1273839634 | -0.0000000000 | 2.7733619255  |
| H  | 1.7911728601  | 0.0000000000  | 0.9514919414  |

6

QSD Point 4

|    |               |               |               |
|----|---------------|---------------|---------------|
| Ca | 1.1699647811  | -0.0000000000 | -1.0763798841 |
| Ca | -0.4834834508 | -0.0000000000 | 1.4996864375  |
| H  | -0.1975549818 | 1.4084825684  | -0.3161632838 |
| H  | -0.1975549818 | -1.4084825684 | -0.3161632838 |
| H  | -2.1386788944 | -0.0000000000 | 2.7409266173  |
| H  | 1.8008945610  | 0.0000000000  | 0.9507307721  |

6

QSD Point 5

|    |               |               |               |
|----|---------------|---------------|---------------|
| Ca | 1.1556949495  | -0.0000000000 | -1.0758508791 |
| Ca | -0.4639160677 | -0.0000000000 | 1.5133225212  |
| H  | -0.2004469148 | 1.4128427512  | -0.3076508566 |
| H  | -0.2004469148 | -1.4128427512 | -0.3076508566 |
| H  | -2.1452971943 | -0.0000000000 | 2.7073632536  |
| H  | 1.8098088225  | 0.0000000000  | 0.9531040547  |

6

QSD Point 6

|    |               |               |               |
|----|---------------|---------------|---------------|
| Ca | 1.1361020027  | -0.0000000000 | -1.0784273708 |
| Ca | -0.4434489893 | -0.0000000000 | 1.5278125914  |
| H  | -0.2035174204 | 1.4191527909  | -0.3033225870 |
| H  | -0.2035174204 | -1.4191527909 | -0.3033225870 |
| H  | -2.1473964199 | -0.0000000000 | 2.6759877713  |
| H  | 1.8178440097  | 0.0000000000  | 0.9639093638  |

6

QSD Point 7

|    |               |               |               |
|----|---------------|---------------|---------------|
| Ca | 1.1121025264  | -0.0000000000 | -1.0878944055 |
| Ca | -0.4238311745 | -0.0000000000 | 1.5408476259  |
| H  | -0.2049884515 | 1.4249177701  | -0.3026527369 |
| H  | -0.2049884515 | -1.4249177701 | -0.3026527369 |
| H  | -2.1470774465 | -0.0000000000 | 2.6504020379  |
| H  | 1.8253537851  | 0.0000000000  | 0.9845873797  |

6

|              |               |               |               |
|--------------|---------------|---------------|---------------|
| QSD Point 8  |               |               |               |
| Ca           | 1.0860509249  | -0.0000000000 | -1.1036148187 |
| Ca           | -0.4059507860 | -0.0000000000 | 1.5518263355  |
| H            | -0.2049368293 | 1.4295703990  | -0.3037294634 |
| H            | -0.2049368293 | -1.4295703990 | -0.3037294634 |
| H            | -2.1459132886 | -0.0000000000 | 2.6299663999  |
| H            | 1.8330157894  | 0.0000000000  | 1.0119181741  |
| 6            |               |               |               |
| QSD Point 9  |               |               |               |
| Ca           | 1.0591272804  | -0.0000000000 | -1.1238781411 |
| Ca           | -0.3897686030 | -0.0000000000 | 1.5610557455  |
| H            | -0.2037715204 | 1.4333079927  | -0.3054365653 |
| H            | -0.2037715204 | -1.4333079927 | -0.3054365653 |
| H            | -2.1444945247 | -0.0000000000 | 2.6131026696  |
| H            | 1.8410639944  | 0.0000000000  | 1.0432300295  |
| 6            |               |               |               |
| QSD Point 10 |               |               |               |
| Ca           | 1.0317752882  | -0.0000000000 | -1.1472404402 |
| Ca           | -0.3749537415 | -0.0000000000 | 1.5689717527  |
| H            | -0.2017978505 | 1.4363794216  | -0.3073080770 |
| H            | -0.2017978505 | -1.4363794216 | -0.3073080770 |
| H            | -2.1429985429 | -0.0000000000 | 2.5985924932  |
| H            | 1.8494563782  | 0.0000000000  | 1.0769295347  |
| 6            |               |               |               |
| QSD Point 11 |               |               |               |
| Ca           | 1.0041447040  | -0.0000000000 | -1.1726647567 |
| Ca           | -0.3611742086 | -0.0000000000 | 1.5759241630  |
| H            | -0.1992040131 | 1.4389614633  | -0.3091716947 |
| H            | -0.1992040131 | -1.4389614633 | -0.3091716947 |
| H            | -2.1414741022 | -0.0000000000 | 2.5856401832  |
| H            | 1.8580703381  | 0.0000000000  | 1.1120810025  |
| 6            |               |               |               |
| QSD Point 12 |               |               |               |
| Ca           | 0.9762851662  | 0.0000000000  | -1.1994187720 |
| Ca           | -0.3481685656 | -0.0000000000 | 1.5821616345  |
| H            | -0.1961054275 | 1.4411703653  | -0.3109709347 |
| H            | -0.1961054275 | -1.4411703653 | -0.3109709347 |
| H            | -2.1399320295 | -0.0000000000 | 2.5737359028  |
| H            | 1.8667805884  | 0.0000000000  | 1.1481003240  |
| 6            |               |               |               |
| QSD Point 13 |               |               |               |
| Ca           | 0.9482152202  | 0.0000000000  | -1.2269754641 |
| Ca           | -0.3357448705 | -0.0000000000 | 1.5878554503  |
| H            | -0.1925763897 | 1.4430828054  | -0.3126936337 |
| H            | -0.1925763897 | -1.4430828054 | -0.3126936337 |
| H            | -2.1383718876 | -0.0000000000 | 2.5625458115  |
| H            | 1.8754812490  | 0.0000000000  | 1.1845987069  |
| 6            |               |               |               |
| QSD Point 14 |               |               |               |
| Ca           | 0.9199465645  | 0.0000000000  | -1.2549451724 |
| Ca           | -0.3237652056 | 0.0000000000  | 1.5931236128  |
| H            | -0.1886684084 | 1.4447507363  | -0.3143442174 |
| H            | -0.1886684084 | -1.4447507363 | -0.3143442174 |
| H            | -2.1367901671 | 0.0000000000  | 2.5518441846  |
| H            | 1.8840891235  | 0.0000000000  | 1.2213030637  |
| 6            |               |               |               |
| QSD Point 15 |               |               |               |
| Ca           | 0.8914912385  | -0.0000000000 | -1.2830323022 |
| Ca           | -0.3121305460 | 0.0000000000  | 1.5980479987  |

|              |               |               |               |
|--------------|---------------|---------------|---------------|
| H            | -0.1844202406 | 1.4462106733  | -0.3159329405 |
| H            | -0.1844202406 | -1.4462106733 | -0.3159329405 |
| H            | -2.1351826338 | 0.0000000000  | 2.5414728148  |
| H            | 1.8925415619  | 0.0000000000  | 1.2580146393  |
| 6            |               |               |               |
| QSD Point 16 |               |               |               |
| Ca           | 0.8628635636  | -0.0000000000 | -1.3110067912 |
| Ca           | -0.3007694753 | -0.0000000000 | 1.6026855358  |
| H            | -0.1798635598 | 1.4474891046  | -0.3174714095 |
| H            | -0.1798635598 | -1.4474891046 | -0.3174714095 |
| H            | -2.1335451524 | 0.0000000000  | 2.5313168364  |
| H            | 1.9007932225  | 0.0000000000  | 1.2945845217  |
| 6            |               |               |               |
| QSD Point 17 |               |               |               |
| Ca           | 0.8340809856  | -0.0000000000 | -1.3386858588 |
| Ca           | -0.2896301542 | -0.0000000000 | 1.6070758427  |
| H            | -0.1750263453 | 1.4486061808  | -0.3189708417 |
| H            | -0.1750263453 | -1.4486061808 | -0.3189708417 |
| H            | -2.1318736746 | 0.0000000000  | 2.5212899473  |
| H            | 1.9088126821  | 0.0000000000  | 1.3308990480  |
| 6            |               |               |               |
| QSD Point 18 |               |               |               |
| Ca           | 0.8051624487  | -0.0000000000 | -1.3659214175 |
| Ca           | -0.2786745138 | -0.0000000000 | 1.6112459142  |
| H            | -0.1699343227 | 1.4495776454  | -0.3204414628 |
| H            | -0.1699343227 | -1.4495776454 | -0.3204414628 |
| H            | -2.1301641932 | 0.0000000000  | 2.5113248822  |
| H            | 1.9165797890  | 0.0000000000  | 1.3668708523  |
| 6            |               |               |               |
| QSD Point 19 |               |               |               |
| Ca           | 0.7761293971  | -0.0000000000 | -1.3925915680 |
| Ca           | -0.2678746280 | -0.0000000000 | 1.6152137149  |
| H            | -0.1646123990 | 1.4504164020  | -0.3218919483 |
| H            | -0.1646123990 | -1.4504164020 | -0.3218919483 |
| H            | -2.1284127437 | 0.0000000000  | 2.5013676411  |
| H            | 1.9240832277  | 0.0000000000  | 1.4024314215  |
| 6            |               |               |               |
| QSD Point 20 |               |               |               |
| Ca           | 0.7470038904  | -0.0000000000 | -1.4185950089 |
| Ca           | -0.2572095614 | -0.0000000000 | 1.6189904952  |
| H            | -0.1590848725 | 1.4511332924  | -0.3233296266 |
| H            | -0.1590848725 | -1.4511332924 | -0.3233296266 |
| H            | -2.1266152007 | 0.0000000000  | 2.4913732308  |
| H            | 1.9313188164  | 0.0000000000  | 1.4375278531  |
| 6            |               |               |               |
| QSD Point 21 |               |               |               |
| Ca           | 0.7178087351  | -0.0000000000 | -1.4438468517 |
| Ca           | -0.2466635083 | -0.0000000000 | 1.6225827012  |
| H            | -0.1533757853 | 1.4517377169  | -0.3247603116 |
| H            | -0.1533757853 | -1.4517377169 | -0.3247603116 |
| H            | -2.1247674050 | 0.0000000000  | 2.4813031513  |
| H            | 1.9382879047  | 0.0000000000  | 1.4721189397  |
| 6            |               |               |               |
| QSD Point 22 |               |               |               |
| Ca           | 0.6885665423  | -0.0000000000 | -1.4682758162 |
| Ca           | -0.2362240169 | -0.0000000000 | 1.6259933182  |
| H            | -0.1475089190 | 1.4522380659  | -0.3261884221 |
| H            | -0.1475089190 | -1.4522380659 | -0.3261884221 |
| H            | -2.1228651481 | 0.0000000000  | 2.4711234582  |



|              |               |               |               |
|--------------|---------------|---------------|---------------|
| H            | 1.9449961238  | 0.0000000000  | 1.5061731979  |
| 6            |               |               |               |
| QSD Point 23 |               |               |               |
| Ca           | 0.6592993837  | -0.0000000000 | -1.4918222001 |
| Ca           | -0.2258810267 | -0.0000000000 | 1.6292233162  |
| H            | -0.1415076798 | 1.4526420197  | -0.3276170084 |
| H            | -0.1415076798 | -1.4526420197 | -0.3276170084 |
| H            | -2.1209042451 | 0.0000000000  | 2.4608034972  |
| H            | 1.9514523208  | 0.0000000000  | 1.5396667093  |
| 6            |               |               |               |
| QSD Point 24 |               |               |               |
| Ca           | 0.6300278524  | -0.0000000000 | -1.5144365684 |
| Ca           | -0.2156256513 | -0.0000000000 | 1.6322725203  |
| H            | -0.1353948489 | 1.4529567464  | -0.3290478663 |
| H            | -0.1353948489 | -1.4529567464 | -0.3290478663 |
| H            | -2.1188805243 | 0.0000000000  | 2.4503147942  |
| H            | 1.9576675948  | 0.0000000000  | 1.5725822793  |
| 6            |               |               |               |
| QSD Point 25 |               |               |               |
| Ca           | 0.6007703065  | -0.0000000000 | -1.5360782164 |
| Ca           | -0.2054495391 | -0.0000000000 | 1.6351403718  |
| H            | -0.1291922600 | 1.4531891216  | -0.3304816114 |
| H            | -0.1291922600 | -1.4531891216 | -0.3304816114 |
| H            | -2.1167900144 | 0.0000000000  | 2.4396304687  |
| H            | 1.9636545435  | 0.0000000000  | 1.6049078727  |
| 6            |               |               |               |
| QSD Point 26 |               |               |               |
| Ca           | 0.5715435392  | -0.0000000000 | -1.5567145467 |
| Ca           | -0.1953448118 | -0.0000000000 | 1.6378265724  |
| H            | -0.1229207391 | 1.4533457997  | -0.3319174782 |
| H            | -0.1229207391 | -1.4533457997 | -0.3319174782 |
| H            | -2.1146289605 | 0.0000000000  | 2.4287252301  |
| H            | 1.9694263595  | 0.0000000000  | 1.6366349496  |
| 6            |               |               |               |
| QSD Point 27 |               |               |               |
| Ca           | 0.5423609074  | -0.0000000000 | -1.5763205005 |
| Ca           | -0.1853032636 | -0.0000000000 | 1.6403316031  |
| H            | -0.1165995782 | 1.4534334126  | -0.3333536165 |
| H            | -0.1165995782 | -1.4534334126 | -0.3333536165 |
| H            | -2.1123938928 | 0.0000000000  | 2.4175744684  |
| H            | 1.9749967077  | 0.0000000000  | 1.6677588792  |
| 6            |               |               |               |
| QSD Point 28 |               |               |               |
| Ca           | 0.5132325644  | -0.0000000000 | -1.5948775913 |
| Ca           | -0.1753165224 | -0.0000000000 | 1.6426569891  |
| H            | -0.1102463288 | 1.4534585599  | -0.3347871397 |
| H            | -0.1102463288 | -1.4534585599 | -0.3347871397 |
| H            | -2.1100816281 | 0.0000000000  | 2.4061545044  |
| H            | 1.9803790340  | 0.0000000000  | 1.6982775549  |
| 6            |               |               |               |
| QSD Point 29 |               |               |               |
| Ca           | 0.4841655873  | -0.0000000000 | -1.6123731441 |
| Ca           | -0.1653760830 | -0.0000000000 | 1.6448050883  |
| H            | -0.1038766965 | 1.4534278171  | -0.3362139557 |
| H            | -0.1038766965 | -1.4534278171 | -0.3362139557 |
| H            | -2.1076894132 | 0.0000000000  | 2.3944426765  |
| H            | 1.9855862456  | 0.0000000000  | 1.7281904206  |
| 6            |               |               |               |
| QSD Point 30 |               |               |               |

|              |               |               |               |
|--------------|---------------|---------------|---------------|
| Ca           | 0.4551637908  | -0.0000000000 | -1.6287995276 |
| Ca           | -0.1554735684 | -0.0000000000 | 1.6467793493  |
| H            | -0.0975043209 | 1.4533476838  | -0.3376289950 |
| H            | -0.0975043209 | -1.4533476838 | -0.3376289950 |
| H            | -2.1052149135 | 0.0000000000  | 2.3824174227  |
| H            | 1.9906305337  | 0.0000000000  | 1.7574978187  |
| 6            |               |               |               |
| QSD Point 31 |               |               |               |
| Ca           | 0.4262282448  | 0.0000000000  | -1.6441533517 |
| Ca           | -0.1456007871 | -0.0000000000 | 1.6485839816  |
| H            | -0.0911409664 | 1.4532249255  | -0.3390262896 |
| H            | -0.0911409664 | -1.4532249255 | -0.3390262896 |
| H            | -2.1026561118 | 0.0000000000  | 2.3700584350  |
| H            | 1.9955231608  | 0.0000000000  | 1.7862005211  |
| 6            |               |               |               |
| QSD Point 32 |               |               |               |
| Ca           | 0.3973566743  | 0.0000000000  | -1.6584346076 |
| Ca           | -0.1357501135 | -0.0000000000 | 1.6502238707  |
| H            | -0.0847959679 | 1.4530659420  | -0.3403992332 |
| H            | -0.0847959679 | -1.4530659420 | -0.3403992332 |
| H            | -2.1000113578 | 0.0000000000  | 2.3573469128  |
| H            | 2.0002742013  | 0.0000000000  | 1.8142992205  |
| 6            |               |               |               |
| QSD Point 33 |               |               |               |
| Ca           | 0.3685461217  | 0.0000000000  | -1.6716457279 |
| Ca           | -0.1259151545 | -0.0000000000 | 1.6517042679  |
| H            | -0.0784771366 | 1.4528773553  | -0.3417404836 |
| H            | -0.0784771366 | -1.4528773553 | -0.3417404836 |
| H            | -2.0972796678 | 0.0000000000  | 2.3442665807  |
| H            | 2.0048926095  | 0.0000000000  | 1.8417926887  |
| 6            |               |               |               |
| QSD Point 34 |               |               |               |
| Ca           | 0.3397919940  | 0.0000000000  | -1.6837911685 |
| Ca           | -0.1160907460 | -0.0000000000 | 1.6530304953  |
| H            | -0.0721902785 | 1.4526654692  | -0.3430422597 |
| H            | -0.0721902785 | -1.4526654692 | -0.3430422597 |
| H            | -2.0944603603 | 0.0000000000  | 2.3308034179  |
| H            | 2.0093859482  | 0.0000000000  | 1.8686785175  |
| 6            |               |               |               |
| QSD Point 35 |               |               |               |
| Ca           | 0.3110891826  | 0.0000000000  | -1.6948765777 |
| Ca           | -0.1062732049 | -0.0000000000 | 1.6542078024  |
| H            | -0.0659395901 | 1.4524365184  | -0.3442967564 |
| H            | -0.0659395901 | -1.4524365184 | -0.3442967564 |
| H            | -2.0915532875 | 0.0000000000  | 2.3169464622  |
| H            | 2.0137604408  | 0.0000000000  | 1.8949524569  |
| 6            |               |               |               |
| QSD Point 36 |               |               |               |
| Ca           | 0.2824345099  | 0.0000000000  | -1.7049088054 |
| Ca           | -0.0964613426 | -0.0000000000 | 1.6552412922  |
| H            | -0.0597280875 | 1.4521964841  | -0.3454960118 |
| H            | -0.0597280875 | -1.4521964841 | -0.3454960118 |
| H            | -2.0885590829 | 0.0000000000  | 2.3026888172  |
| H            | 2.0180209696  | 0.0000000000  | 1.9206072261  |
| 6            |               |               |               |
| QSD Point 37 |               |               |               |
| Ca           | 0.2538247940  | 0.0000000000  | -1.7138951737 |
| Ca           | -0.0866555463 | -0.0000000000 | 1.6561353183  |
| H            | -0.0535572819 | 1.4519511139  | -0.3466326141 |

|              |               |               |               |
|--------------|---------------|---------------|---------------|
| H            | -0.0535572819 | -1.4519511139 | -0.3466326141 |
| H            | -2.0854786179 | 0.0000000000  | 2.2880269719  |
| H            | 2.0221708963  | 0.0000000000  | 1.9456344806  |
| 6            |               |               |               |
| QSD Point 38 |               |               |               |
| Ca           | 0.2252607428  | 0.0000000000  | -1.7218435461 |
| Ca           | -0.0768588503 | -0.0000000000 | 1.6568937545  |
| H            | -0.0474282009 | 1.4517059843  | -0.3476996630 |
| H            | -0.0474282009 | -1.4517059843 | -0.3476996630 |
| H            | -2.0823135438 | 0.0000000000  | 2.2729625493  |
| H            | 2.0262120691  | 0.0000000000  | 1.9700227859  |
| 6            |               |               |               |
| QSD Point 39 |               |               |               |
| Ca           | 0.1967463753  | -0.0000000000 | -1.7287627633 |
| Ca           | -0.0670767365 | -0.0000000000 | 1.6575196601  |
| H            | -0.0413410365 | 1.4514664174  | -0.3486912127 |
| H            | -0.0413410365 | -1.4514664174 | -0.3486912127 |
| H            | -2.0790658888 | 0.0000000000  | 2.2575022643  |
| H            | 2.0301445280  | 0.0000000000  | 1.9937593166  |
| 6            |               |               |               |
| QSD Point 40 |               |               |               |
| Ca           | 0.1682889741  | 0.0000000000  | -1.7346621853 |
| Ca           | -0.0573165400 | -0.0000000000 | 1.6580146110  |
| H            | -0.0352955257 | 1.4512377235  | -0.3496025163 |
| H            | -0.0352955257 | -1.4512377235 | -0.3496025163 |
| H            | -2.0757377472 | 0.0000000000  | 2.2416575519  |
| H            | 2.0339665676  | 0.0000000000  | 2.0168309275  |
| 6            |               |               |               |
| QSD Point 41 |               |               |               |
| Ca           | 0.1398999222  | 0.0000000000  | -1.7395515876 |
| Ca           | -0.0475884078 | -0.0000000000 | 1.6583790486  |
| H            | -0.0292906260 | 1.4510253943  | -0.3504305957 |
| H            | -0.0292906260 | -1.4510253943 | -0.3504305957 |
| H            | -2.0723318788 | 0.0000000000  | 2.2254471014  |
| H            | 2.0376741842  | 0.0000000000  | 2.0392223066  |
| 6            |               |               |               |
| QSD Point 42 |               |               |               |
| Ca           | 0.1116029745  | 0.0000000000  | -1.7434465495 |
| Ca           | -0.0379039101 | -0.0000000000 | 1.6586117759  |
| H            | -0.0233272348 | 1.4508367887  | -0.3511738978 |
| H            | -0.0233272348 | -1.4508367887 | -0.3511738978 |
| H            | -2.0688490314 | 0.0000000000  | 2.2088941681  |
| H            | 2.0412597810  | 0.0000000000  | 2.0609238668  |
| 6            |               |               |               |
| QSD Point 43 |               |               |               |
| Ca           | 0.0833582773  | -0.0000000000 | -1.7463400844 |
| Ca           | -0.0282870908 | 0.0000000000  | 1.6587111649  |
| H            | -0.0173835775 | 1.4506775688  | -0.3518339392 |
| H            | -0.0173835775 | -1.4506775688 | -0.3518339392 |
| H            | -2.0653035784 | 0.0000000000  | 2.1920598074  |
| H            | 2.0447152398  | 0.0000000000  | 2.0818722599  |
| 6            |               |               |               |
| QSD Point 44 |               |               |               |
| Ca           | 0.0555464628  | -0.0000000000 | -1.7487853090 |
| Ca           | -0.0187586912 | 0.0000000000  | 1.6587051035  |
| H            | -0.0115233955 | 1.4505315685  | -0.3525140605 |
| H            | -0.0115233955 | -1.4505315685 | -0.3525140605 |
| H            | -2.0617085821 | 0.0000000000  | 2.1752412890  |
| H            | 2.0480172844  | 0.0000000000  | 2.1025019061  |

|              |               |               |               |
|--------------|---------------|---------------|---------------|
| 6            |               |               |               |
| QSD Point 45 |               |               |               |
| Ca           | 0.0068667851  | -0.0000000000 | -1.7488262474 |
| Ca           | -0.0023189545 | 0.0000000000  | 1.6587038137  |
| H            | -0.0014244836 | 1.4505290153  | -0.3525272565 |
| H            | -0.0014244836 | -1.4505290153 | -0.3525272565 |
| H            | -2.0557053609 | -0.0000000000 | 2.1434018208  |
| H            | 2.0540127935  | 0.0000000000  | 2.1344099868  |
| 6            |               |               |               |
| QSD Point 46 |               |               |               |
| Ca           | 0.0000000000  | 0.0000000000  | -1.7488055676 |
| Ca           | 0.0000000000  | 0.0000000000  | 1.6587039703  |
| H            | 0.0000000000  | 1.4505284981  | -0.3525164304 |
| H            | 0.0000000000  | -1.4505284981 | -0.3525164304 |
| H            | -2.0548562403 | 0.0000000000  | 2.1388846555  |
| H            | 2.0548562403  | 0.0000000000  | 2.1388846555  |
| 6            |               |               |               |
| QSD Point 47 |               |               |               |
| Ca           | -0.0068667403 | -0.0000000000 | -1.7488262909 |
| Ca           | 0.0023189967  | 0.0000000000  | 1.6587037947  |
| H            | 0.0014245099  | 1.4505289952  | -0.3525272847 |
| H            | 0.0014245099  | -1.4505289952 | -0.3525272847 |
| H            | -2.0540127431 | 0.0000000000  | 2.1344100288  |
| H            | 2.0557053892  | 0.0000000000  | 2.1434018779  |
| 6            |               |               |               |
| QSD Point 48 |               |               |               |
| Ca           | -0.0555460688 | -0.0000000000 | -1.7487852991 |
| Ca           | 0.0187589992  | -0.0000000000 | 1.6587051129  |
| H            | 0.0115235722  | 1.4505315774  | -0.3525140601 |
| H            | 0.0115235722  | -1.4505315774 | -0.3525140601 |
| H            | -2.0480169801 | 0.0000000000  | 2.1025019120  |
| H            | 2.0617089015  | -0.0000000000 | 2.1752412427  |
| 6            |               |               |               |
| QSD Point 49 |               |               |               |
| Ca           | -0.0833586961 | -0.0000000000 | -1.7463400957 |
| Ca           | 0.0282856217  | 0.0000000000  | 1.6587111786  |
| H            | 0.0173829979  | 1.4506775801  | -0.3518339490 |
| H            | 0.0173829979  | -1.4506775801 | -0.3518339490 |
| H            | -2.0447170334 | -0.0000000000 | 2.0818710391  |
| H            | 2.0653017880  | -0.0000000000 | 2.1920610085  |
| 6            |               |               |               |
| QSD Point 50 |               |               |               |
| Ca           | -0.1116033114 | -0.0000000000 | -1.7434465229 |
| Ca           | 0.0379008880  | 0.0000000000  | 1.6586117971  |
| H            | 0.0233258984  | 1.4508368079  | -0.3511738730 |
| H            | 0.0233258984  | -1.4508368079 | -0.3511738730 |
| H            | -2.0412632511 | -0.0000000000 | 2.0609219241  |
| H            | 2.0688455271  | -0.0000000000 | 2.2088959729  |
| 6            |               |               |               |
| QSD Point 51 |               |               |               |
| Ca           | -0.1399003951 | -0.0000000000 | -1.7395516412 |
| Ca           | 0.0475831387  | -0.0000000000 | 1.6583790962  |
| H            | 0.0292882765  | 1.4510253839  | -0.3504305428 |
| H            | 0.0292882765  | -1.4510253839 | -0.3504305428 |
| H            | -2.0376801231 | 0.0000000000  | 2.0392192524  |
| H            | 2.0723258509  | 0.0000000000  | 2.2254500111  |
| 6            |               |               |               |
| QSD Point 52 |               |               |               |
| Ca           | -0.1682899204 | 0.0000000000  | -1.7346623366 |

|              |               |               |               |
|--------------|---------------|---------------|---------------|
| Ca           | 0.0573086830  | -0.0000000000 | 1.6580147101  |
| H            | 0.0352919957  | 1.4512377246  | -0.3496024377 |
| H            | 0.0352919957  | -1.4512377246 | -0.3496024377 |
| H            | -2.0339754124 | 0.0000000000  | 2.0168262876  |
| H            | 2.0757286839  | 0.0000000000  | 2.2416620386  |
| 6            |               |               |               |
| QSD Point 53 |               |               |               |
| Ca           | -0.1967474454 | 0.0000000000  | -1.7287630144 |
| Ca           | 0.0670656855  | -0.0000000000 | 1.6575197843  |
| H            | 0.0413360214  | 1.4514664296  | -0.3486910943 |
| H            | 0.0413360214  | -1.4514664296 | -0.3486910943 |
| H            | -2.0301567979 | 0.0000000000  | 1.9937530822  |
| H            | 2.0790531583  | 0.0000000000  | 2.2575083380  |
| 6            |               |               |               |
| QSD Point 54 |               |               |               |
| Ca           | -0.2252625591 | -0.0000000000 | -1.7218440418 |
| Ca           | 0.0768443029  | -0.0000000000 | 1.6568940018  |
| H            | 0.0474216415  | 1.4517060012  | -0.3476994756 |
| H            | 0.0474216415  | -1.4517060012 | -0.3476994756 |
| H            | -2.0262282124 | 0.0000000000  | 1.9700144200  |
| H            | 2.0822966673  | 0.0000000000  | 2.2729707356  |
| 6            |               |               |               |
| QSD Point 55 |               |               |               |
| Ca           | -0.2824373528 | -0.0000000000 | -1.7049098491 |
| Ca           | 0.0964383710  | 0.0000000000  | 1.6552417644  |
| H            | 0.0597176705  | 1.4521964960  | -0.3454956823 |
| H            | 0.0597176705  | -1.4521964960 | -0.3454956823 |
| H            | -2.0180461134 | -0.0000000000 | 1.9205942588  |
| H            | 2.0885322100  | -0.0000000000 | 2.3027016406  |
| 6            |               |               |               |
| QSD Point 55 |               |               |               |
| Ca           | -0.3110931080 | -0.0000000000 | -1.6948780254 |
| Ca           | 0.1062455371  | 0.0000000000  | 1.6542084739  |
| H            | 0.0659270826  | 1.4524365330  | -0.3442962720 |
| H            | 0.0659270826  | -1.4524365330 | -0.3442962720 |
| H            | -2.0137906334 | -0.0000000000 | 1.8949365287  |
| H            | 2.0915207750  | -0.0000000000 | 2.3169621404  |
| 6            |               |               |               |
| QSD Point 56 |               |               |               |
| Ca           | -0.3397965900 | -0.0000000000 | -1.6837930100 |
| Ca           | 0.1160578717  | 0.0000000000  | 1.6530313287  |
| H            | 0.0721753990  | 1.4526654786  | -0.3430416497 |
| H            | 0.0721753990  | -1.4526654786 | -0.3430416497 |
| H            | -2.0094215154 | -0.0000000000 | 1.8686597388  |
| H            | 2.0944216440  | -0.0000000000 | 2.3308219261  |
| 6            |               |               |               |
| QSD Point 57 |               |               |               |
| Ca           | -0.3685514435 | -0.0000000000 | -1.6716481462 |
| Ca           | 0.1258767261  | 0.0000000000  | 1.6517053294  |
| H            | 0.0784597286  | 1.4528773660  | -0.3417396999 |
| H            | 0.0784597286  | -1.4528773660 | -0.3417396999 |
| H            | -2.0049339087 | -0.0000000000 | 1.8417709889  |
| H            | 2.0972342933  | -0.0000000000 | 2.3442880109  |
| 6            |               |               |               |
| QSD Point 58 |               |               |               |
| Ca           | -0.3973630544 | -0.0000000000 | -1.6584377724 |
| Ca           | 0.1357058692  | 0.0000000000  | 1.6502252840  |
| H            | 0.0847759387  | 1.4530659559  | -0.3403982585 |
| H            | 0.0847759387  | -1.4530659559 | -0.3403982585 |

|              |               |               |               |
|--------------|---------------|---------------|---------------|
| H            | -2.0003215002 | -0.0000000000 | 1.8142742799  |
| H            | 2.0999589654  | -0.0000000000 | 2.3573715962  |
| 6            |               |               |               |
| QSD Point 59 |               |               |               |
| Ca           | -0.4262357737 | -0.0000000000 | -1.6441572352 |
| Ca           | 0.1455504532  | 0.0000000000  | 1.6485857178  |
| H            | 0.0911181420  | 1.4532249471  | -0.3390250682 |
| H            | 0.0911181420  | -1.4532249471 | -0.3390250682 |
| H            | -1.9955766596 | -0.0000000000 | 1.7861720184  |
| H            | 2.1025963120  | -0.0000000000 | 2.3700865827  |
| 6            |               |               |               |
| QSD Point 60 |               |               |               |
| Ca           | -0.4551725849 | -0.0000000000 | -1.6288041854 |
| Ca           | 0.1554168097  | 0.0000000000  | 1.6467813982  |
| H            | 0.0974786018  | 1.4533477281  | -0.3376274922 |
| H            | 0.0974786018  | -1.4533477281 | -0.3376274922 |
| H            | -1.9906904635 | -0.0000000000 | 1.7574656203  |
| H            | 2.1051472993  | -0.0000000000 | 2.3824491653  |
| 6            |               |               |               |
| QSD Point 61 |               |               |               |
| Ca           | -0.4841757836 | -0.0000000000 | -1.6123787399 |
| Ca           | 0.1653126698  | 0.0000000000  | 1.6448076319  |
| H            | 0.1038479249  | 1.4534278690  | -0.3362121536 |
| H            | 0.1038479249  | -1.4534278690 | -0.3362121536 |
| H            | -1.9856528265 | -0.0000000000 | 1.7281543279  |
| H            | 2.1076136154  | -0.0000000000 | 2.3944781581  |
| 6            |               |               |               |
| QSD Point 62 |               |               |               |
| Ca           | -0.5132441222 | -0.0000000000 | -1.5948842113 |
| Ca           | 0.1752461127  | 0.0000000000  | 1.6426599728  |
| H            | 0.1102143437  | 1.4534586277  | -0.3347850299 |
| H            | 0.1102143437  | -1.4534586277 | -0.3347850299 |
| H            | -1.9804524550 | -0.0000000000 | 1.6982375450  |
| H            | 2.1099972468  | -0.0000000000 | 2.4061938723  |
| 6            |               |               |               |
| QSD Point 63 |               |               |               |
| Ca           | -0.5423740124 | -0.0000000000 | -1.5763283015 |
| Ca           | 0.1852255860  | 0.0000000000  | 1.6403351277  |
| H            | 0.1165642763  | 1.4534335056  | -0.3333511279 |
| H            | 0.1165642763  | -1.4534335056 | -0.3333511279 |
| H            | -1.9750771867 | -0.0000000000 | 1.6677147716  |
| H            | 2.1123005650  | -0.0000000000 | 2.4176178170  |
| 6            |               |               |               |
| QSD Point 64 |               |               |               |
| Ca           | -0.5715585441 | -0.0000000000 | -1.5567235360 |
| Ca           | 0.1952596812  | 0.0000000000  | 1.6378306670  |
| H            | 0.1228820354  | 1.4533459315  | -0.3319145420 |
| H            | 0.1228820354  | -1.4533459315 | -0.3319145420 |
| H            | -1.9695140496 | -0.0000000000 | 1.6365863119  |
| H            | 2.1145263555  | -0.0000000000 | 2.4287728327  |
| 6            |               |               |               |
| QSD Point 65 |               |               |               |
| Ca           | -0.6007873274 | -0.0000000000 | -1.5360884527 |
| Ca           | 0.2053566758  | 0.0000000000  | 1.6351450712  |
| H            | 0.1291500016  | 1.4531892829  | -0.3304782128 |
| H            | 0.1291500016  | -1.4531892829 | -0.3304782128 |
| H            | -1.9637495882 | -0.0000000000 | 1.6048545321  |
| H            | 2.1166777566  | -0.0000000000 | 2.4396824923  |
| 6            |               |               |               |

|              |               |               |               |
|--------------|---------------|---------------|---------------|
| QSD Point 66 |               |               |               |
| Ca           | -0.6300466033 | -0.0000000000 | -1.5144483187 |
| Ca           | 0.2155246278  | 0.0000000000  | 1.6322779000  |
| H            | 0.1353487998  | 1.4529569080  | -0.3290440320 |
| H            | 0.1353487998  | -1.4529569080 | -0.3290440320 |
| H            | -1.9577702155 | -0.0000000000 | 1.5725245302  |
| H            | 2.1187581809  | -0.0000000000 | 2.4503711893  |
| 6            |               |               |               |
| QSD Point 67 |               |               |               |
| Ca           | -0.6593208224 | -0.0000000000 | -1.4918355397 |
| Ca           | 0.2257718450  | 0.0000000000  | 1.6292294893  |
| H            | 0.1414578934  | 1.4526422589  | -0.3276125668 |
| H            | 0.1414578934  | -1.4526422589 | -0.3276125668 |
| H            | -1.9515626353 | -0.0000000000 | 1.5396037268  |
| H            | 2.1207715330  | -0.0000000000 | 2.4608647079  |
| 6            |               |               |               |
| QSD Point 68 |               |               |               |
| Ca           | -0.6885904576 | -0.0000000000 | -1.4682906268 |
| Ca           | 0.2361063176  | 0.0000000000  | 1.6260002299  |
| H            | 0.1474551392  | 1.4522383214  | -0.3261833898 |
| H            | 0.1474551392  | -1.4522383214 | -0.3261833898 |
| H            | -1.9451142306 | -0.0000000000 | 1.5061048710  |
| H            | 2.1227216681  | -0.0000000000 | 2.4711895653  |
| 6            |               |               |               |
| QSD Point 69 |               |               |               |
| Ca           | -0.7178355168 | -0.0000000000 | -1.4438633618 |
| Ca           | 0.2465370517  | 0.0000000000  | 1.6225904696  |
| H            | 0.1533179400  | 1.4517380189  | -0.3247546475 |
| H            | 0.1533179400  | -1.4517380189 | -0.3247546475 |
| H            | -1.9384139361 | -0.0000000000 | 1.4720451408  |
| H            | 2.1246127676  | -0.0000000000 | 2.4813743106  |
| 6            |               |               |               |
| QSD Point 70 |               |               |               |
| Ca           | -0.7470336338 | -0.0000000000 | -1.4186132757 |
| Ca           | 0.2570741215  | 0.0000000000  | 1.6189991761  |
| H            | 0.1590227790  | 1.4511336159  | -0.3233232925 |
| H            | 0.1590227790  | -1.4511336159 | -0.3233232925 |
| H            | -1.9314528881 | -0.0000000000 | 1.4374483746  |
| H            | 2.1264490482  | -0.0000000000 | 2.4914495747  |
| 6            |               |               |               |
| QSD Point 71 |               |               |               |
| Ca           | -0.7761622984 | -0.0000000000 | -1.3926118080 |
| Ca           | 0.2677299461  | 0.0000000000  | 1.6152233758  |
| H            | 0.1645459333  | 1.4504167468  | -0.3218849177 |
| H            | 0.1645459333  | -1.4504167468 | -0.3218849177 |
| H            | -1.9242254309 | -0.0000000000 | 1.4023462318  |
| H            | 2.1282347097  | -0.0000000000 | 2.5014492975  |
| 6            |               |               |               |
| QSD Point 72 |               |               |               |
| Ca           | -0.8051986599 | -0.0000000000 | -1.3659438413 |
| Ca           | 0.2785203685  | 0.0000000000  | 1.6112566228  |
| H            | 0.1698633446  | 1.4495780057  | -0.3204337015 |
| H            | 0.1698633446  | -1.4495780057 | -0.3204337015 |
| H            | -1.9167301956 | -0.0000000000 | 1.3667799115  |
| H            | 2.1299739510  | -0.0000000000 | 2.5114119655  |
| 6            |               |               |               |
| QSD Point 73 |               |               |               |
| Ca           | -0.8341207025 | -0.0000000000 | -1.3387106464 |
| Ca           | 0.2894663926  | 0.0000000000  | 1.6070876861  |

|              |               |               |               |
|--------------|---------------|---------------|---------------|
| H            | 0.1749507298  | 1.4486065386  | -0.3189623177 |
| H            | 0.1749507298  | -1.4486065386 | -0.3189623177 |
| H            | -1.9089713067 | -0.0000000000 | 1.3308022778  |
| H            | 2.1316709211  | -0.0000000000 | 2.5213825647  |
| 6            |               |               |               |
| QSD Point 74 |               |               |               |
| Ca           | -0.8629075102 | -0.0000000000 | -1.3110339578 |
| Ca           | 0.3005961445  | 0.0000000000  | 1.6026985823  |
| H            | 0.1797833119  | 1.4474894754  | -0.3174620013 |
| H            | 0.1797833119  | -1.4474894754 | -0.3174620013 |
| H            | -1.9009599384 | -0.0000000000 | 1.2944813461  |
| H            | 2.1333297081  | -0.0000000000 | 2.5314152674  |
| 6            |               |               |               |
| QSD Point 75 |               |               |               |
| Ca           | -0.8915391742 | -0.0000000000 | -1.2830620127 |
| Ca           | 0.3119475066  | -0.0000000000 | 1.5980622517  |
| H            | 0.1843351546  | 1.4462109711  | -0.3159226914 |
| H            | 0.1843351546  | -1.4462109711 | -0.3159226914 |
| H            | -1.8927162774 | -0.0000000000 | 1.2579053370  |
| H            | 2.1349542812  | -0.0000000000 | 2.5415770292  |
| 6            |               |               |               |
| QSD Point 76 |               |               |               |
| Ca           | -0.9199991131 | -0.0000000000 | -1.2549776917 |
| Ca           | 0.3235726076  | -0.0000000000 | 1.5931391811  |
| H            | 0.1885785378  | 1.4447509838  | -0.3143330496 |
| H            | 0.1885785378  | -1.4447509838 | -0.3143330496 |
| H            | -1.8842715893 | -0.0000000000 | 1.2211874956  |
| H            | 2.1365488288  | -0.0000000000 | 2.5519543220  |
| 6            |               |               |               |
| QSD Point 77 |               |               |               |
| Ca           | -0.9482722121 | -0.0000000000 | -1.2270110193 |
| Ca           | 0.3355428771  | -0.0000000000 | 1.5878723443  |
| H            | 0.1924816159  | 1.4430828962  | -0.3126815626 |
| H            | 0.1924816159  | -1.4430828962 | -0.3126815626 |
| H            | -1.8756711909 | -0.0000000000 | 1.1844771647  |
| H            | 2.1381175810  | -0.0000000000 | 2.5626618276  |
| 6            |               |               |               |
| QSD Point 78 |               |               |               |
| Ca           | -0.9763470842 | -0.0000000000 | -1.1994576923 |
| Ca           | 0.3479576321  | -0.0000000000 | 1.5821798979  |
| H            | 0.1960058540  | 1.4411702939  | -0.3109578998 |
| H            | 0.1960058540  | -1.4411702939 | -0.3109578998 |
| H            | -1.8669775086 | -0.0000000000 | 1.1479728963  |
| H            | 2.1396649791  | -0.0000000000 | 2.5738578733  |
| 6            |               |               |               |
| QSD Point 79 |               |               |               |
| Ca           | -1.0042114570 | -0.0000000000 | -1.1727074032 |
| Ca           | 0.3609549133  | 0.0000000000  | 1.5759437889  |
| H            | 0.1990996784  | 1.4389610868  | -0.3091577338 |
| H            | 0.1990996784  | -1.4389610868 | -0.3091577338 |
| H            | -1.8582735815 | -0.0000000000 | 1.1119482137  |
| H            | 2.1411947039  | -0.0000000000 | 2.5857680277  |
| 6            |               |               |               |
| QSD Point 80 |               |               |               |
| Ca           | -1.0318468026 | -0.0000000000 | -1.1472874203 |
| Ca           | 0.3747269417  | 0.0000000000  | 1.5689926704  |
| H            | 0.2016889528  | 1.4363786268  | -0.3072932394 |
| H            | 0.2016889528  | -1.4363786268 | -0.3072932394 |
| H            | -1.8496651042 | -0.0000000000 | 1.0767923140  |



|              |               |               |               |
|--------------|---------------|---------------|---------------|
| H            | 2.1427074576  | -0.0000000000 | 2.5987260590  |
| 6            |               |               |               |
| QSD Point 81 |               |               |               |
| Ca           | -1.0592035970 | -0.0000000000 | -1.1239300297 |
| Ca           | 0.3895357263  | 0.0000000000  | 1.5610778435  |
| H            | 0.2036583613  | 1.4333066112  | -0.3054209202 |
| H            | 0.2036583613  | -1.4333066112 | -0.3054209202 |
| H            | -1.8412769976 | -0.0000000000 | 1.0430892094  |
| H            | 2.1441928419  | -0.0000000000 | 2.6132419491  |
| 6            |               |               |               |
| QSD Point 82 |               |               |               |
| Ca           | -1.0861313555 | -0.0000000000 | -1.1036724911 |
| Ca           | 0.4057135230  | 0.0000000000  | 1.5518492845  |
| H            | 0.2048197251  | 1.4295681239  | -0.3037133028 |
| H            | 0.2048197251  | -1.4295681239 | -0.3037133028 |
| H            | -1.8332315321 | -0.0000000000 | 1.0117755921  |
| H            | 2.1456024493  | -0.0000000000 | 2.6301113449  |
| 6            |               |               |               |
| QSD Point 83 |               |               |               |
| Ca           | -1.1121859236 | -0.0000000000 | -1.0879589616 |
| Ca           | 0.4235914928  | 0.0000000000  | 1.5408711641  |
| H            | 0.2048678504  | 1.4249143147  | -0.3026367370 |
| H            | 0.2048678504  | -1.4249143147 | -0.3026367370 |
| H            | -1.8255705025 | -0.0000000000 | 0.9844457382  |
| H            | 2.1467591218  | -0.0000000000 | 2.6505526608  |
| 6            |               |               |               |
| QSD Point 84 |               |               |               |
| Ca           | -1.1361860686 | -0.0000000000 | -1.0784995484 |
| Ca           | 0.4432081954  | 0.0000000000  | 1.5278365655  |
| H            | 0.2033936085  | 1.4191480307  | -0.3033080639 |
| H            | 0.2033936085  | -1.4191480307 | -0.3033080639 |
| H            | -1.8180602184 | -0.0000000000 | 0.9637719287  |
| H            | 2.1470716790  | -0.0000000000 | 2.6761443311  |
| 6            |               |               |               |
| QSD Point 85 |               |               |               |
| Ca           | -1.1557767656 | -0.0000000000 | -1.0759294680 |
| Ca           | 0.4636718912  | 0.0000000000  | 1.5133480173  |
| H            | 0.2003199837  | 1.4128378141  | -0.3076393359 |
| H            | 0.2003199837  | -1.4128378141 | -0.3076393359 |
| H            | -1.8100261565 | -0.0000000000 | 0.9529726602  |
| H            | 2.1449635208  | -0.0000000000 | 2.7075246698  |
| 6            |               |               |               |
| QSD Point 86 |               |               |               |
| Ca           | -1.1700487958 | 0.0000000000  | -1.0764602652 |
| Ca           | 0.4832286250  | -0.0000000000 | 1.4997159162  |
| H            | 0.1974246959  | 1.4084797292  | -0.3161535248 |
| H            | 0.1974246959  | -1.4084797292 | -0.3161535248 |
| H            | -1.8011216184 | -0.0000000000 | 0.9505976060  |
| H            | 2.1383283618  | 0.0000000000  | 2.7410911256  |
| 6            |               |               |               |
| QSD Point 87 |               |               |               |
| Ca           | -1.1814200574 | -0.0000000000 | -1.0760589845 |
| Ca           | 0.5008442197  | 0.0000000000  | 1.4874389513  |
| H            | 0.1968854895  | 1.4069851295  | -0.3268174447 |
| H            | 0.1968854895  | -1.4069851295 | -0.3268174447 |
| H            | -1.7914204544 | -0.0000000000 | 0.9513582627  |
| H            | 2.1270045112  | -0.0000000000 | 2.7735343233  |
| 6            |               |               |               |
| QSD Point 88 |               |               |               |

|              |               |               |               |
|--------------|---------------|---------------|---------------|
| Ca           | -1.1850328576 | 0.0000000000  | -1.0775608206 |
| Ca           | 0.5152143173  | -0.0000000000 | 1.4749660163  |
| H            | 0.1968415945  | 1.4057757524  | -0.3401842462 |
| H            | 0.1968415945  | -1.4057757524 | -0.3401842462 |
| H            | -1.7804631112 | -0.0000000000 | 0.9598298103  |
| H            | 2.1109000068  | -0.0000000000 | 2.8057719843  |
| 6            |               |               |               |
| QSD Point 89 |               |               |               |
| Ca           | -1.2142428940 | 0.0000000000  | -1.0669446343 |
| Ca           | 0.5340947459  | -0.0000000000 | 1.4706016060  |
| H            | 0.2041856580  | 1.4084453776  | -0.3452039594 |
| H            | 0.2041856580  | -1.4084453776 | -0.3452039594 |
| H            | -1.7715628996 | -0.0000000000 | 0.9430629898  |
| H            | 2.0987910052  | 0.0000000000  | 2.8263269599  |

## References

- <sup>1</sup> J. G. Hill and K. A. Peterson. Gaussian basis sets for use in correlated molecular calculations. xi. pseudopotential-based and all-electron relativistic basis sets for alkali metal (k–fr) and alkaline earth (ca–ra) elements. *The Journal of chemical physics*, 147(24):244106, 2017.
- <sup>2</sup> T. Hrenar, H.-J. Werner, and G. Rauhut. Towards accurate ab initio calculations on the vibrational modes of the alkaline earth metal hydrides. *Phys. Chem. Chem. Phys.*, 7(17):3123–3125, 2005.
- <sup>3</sup> K.-P. Huber and G. Herzberg. *Molecular Spectra and Molecular Structure: IV. Constants of Diatomic Molecules*. Springer Science & Business Media, 2013.
- <sup>4</sup> I. S. Lim, H. Stoll, and P. Schwerdtfeger. Relativistic small-core energy-consistent pseudopotentials for the alkaline-earth elements from ca to ra. *The Journal of chemical physics*, 124(3):034107, 2006.
